# Supplementary material for: Some coagulase negative Staphylococcus spp. isolated from buffalo can be misidentified as Staphylococcus aureus by phenotypic and Sa442 PCR methods
Source: PubMed Central journal article supplement (PMC5977496; doi:10.1186/s13104-018-3449-8), 2018-05-30

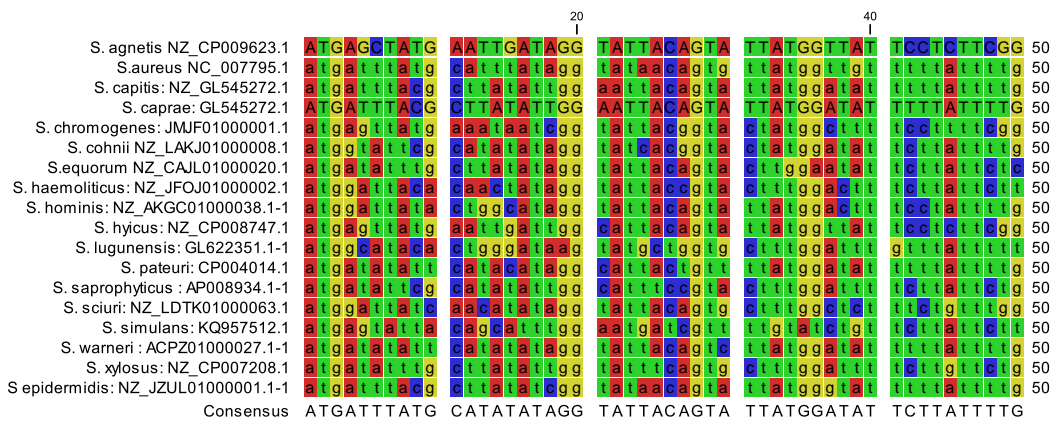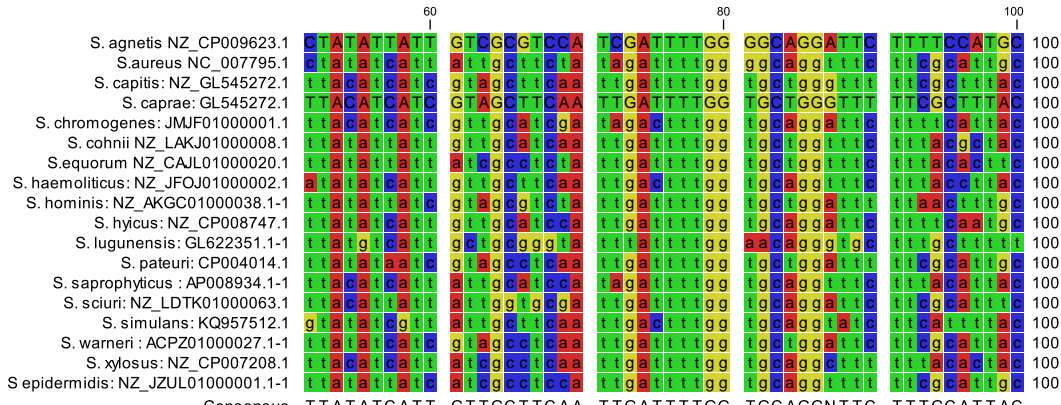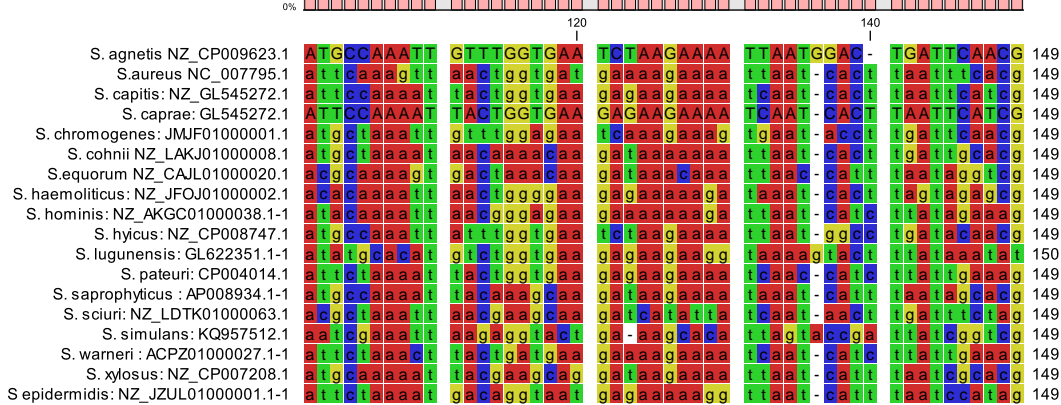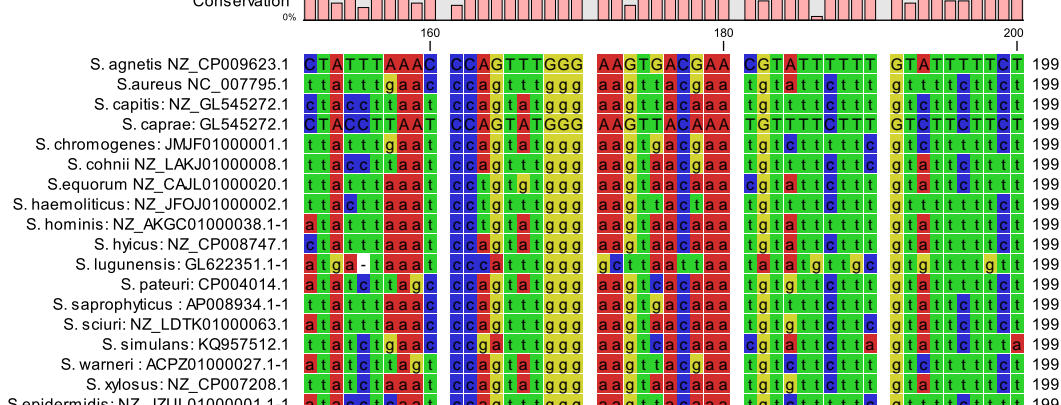

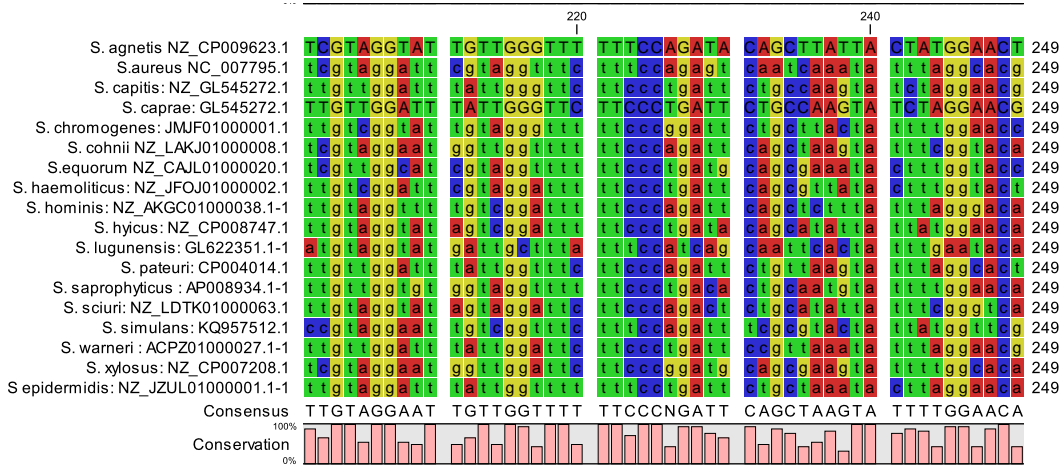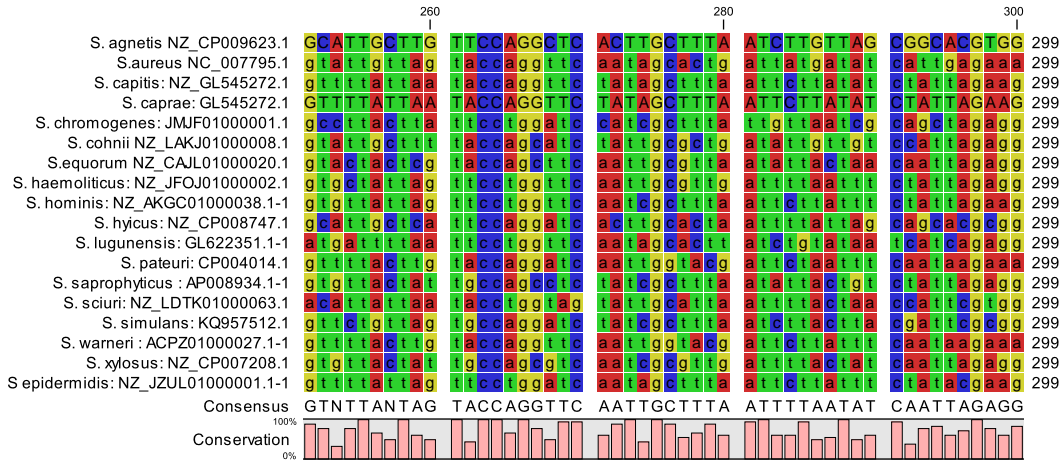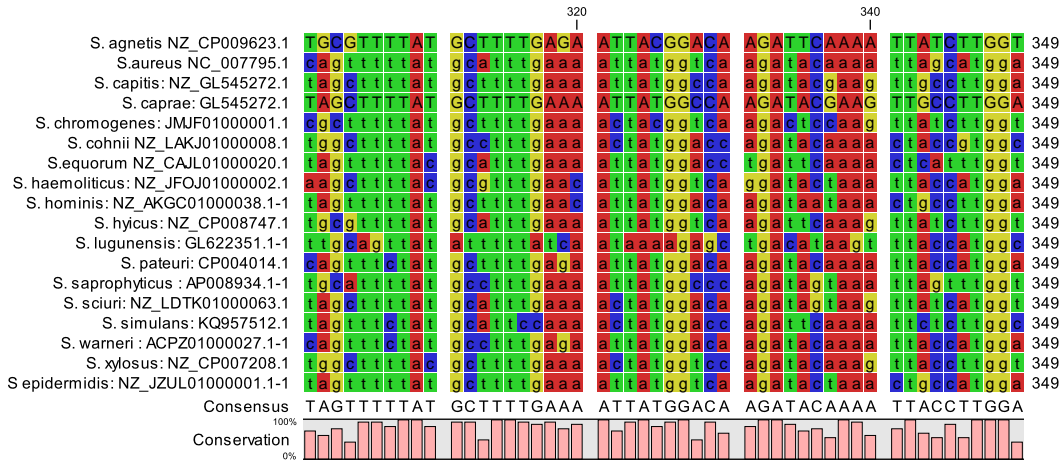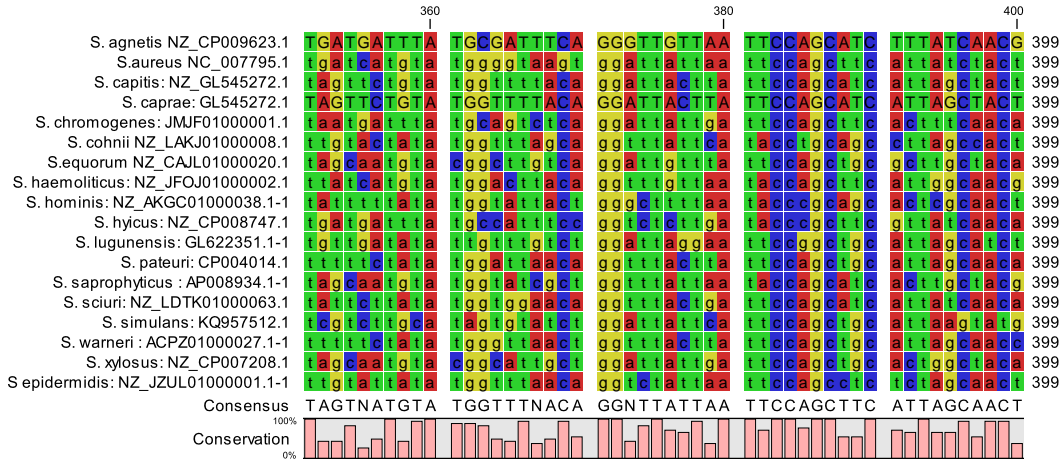

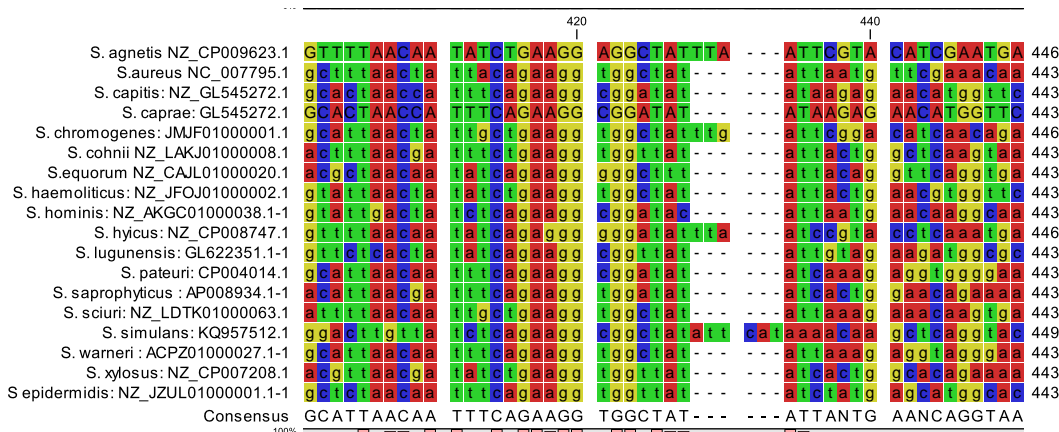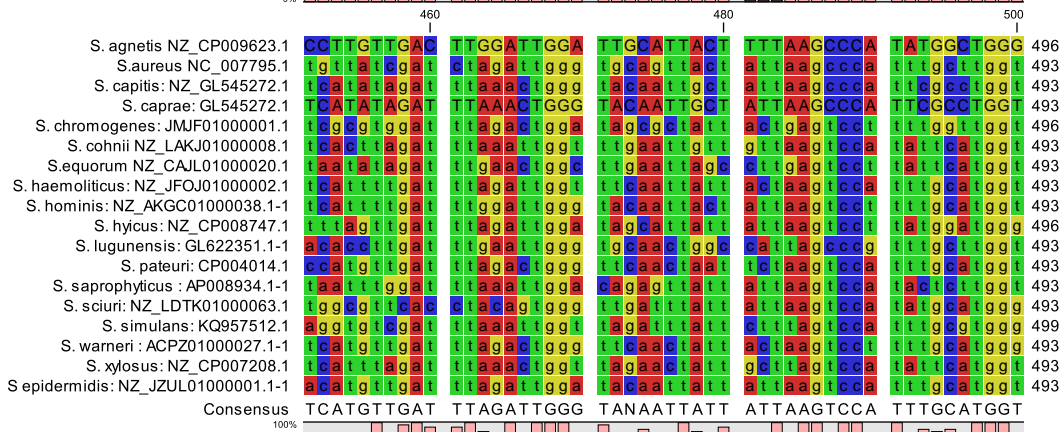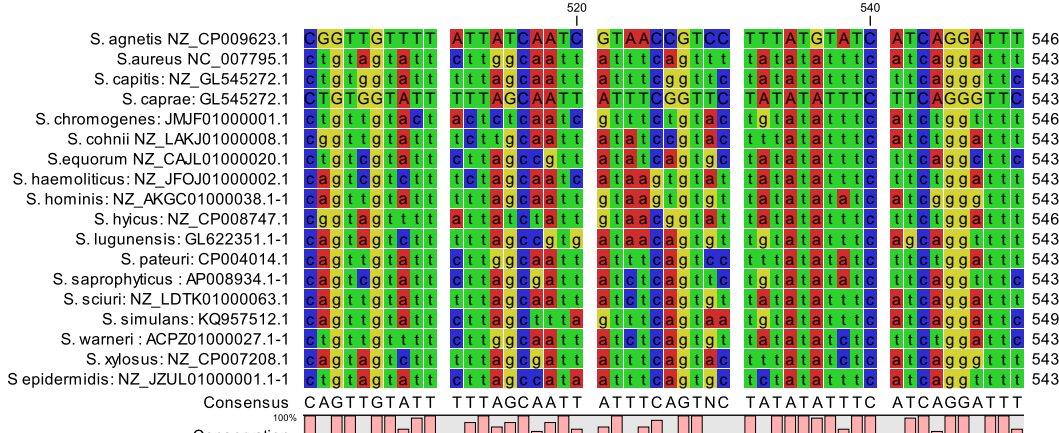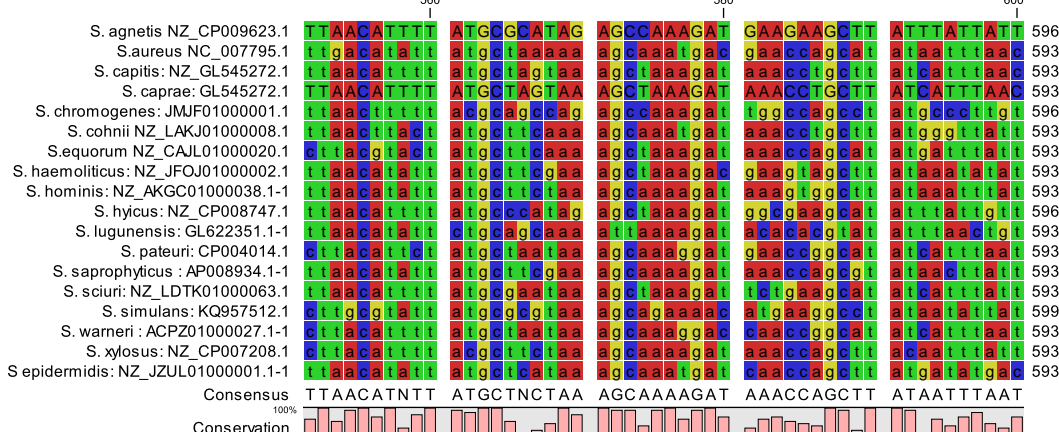

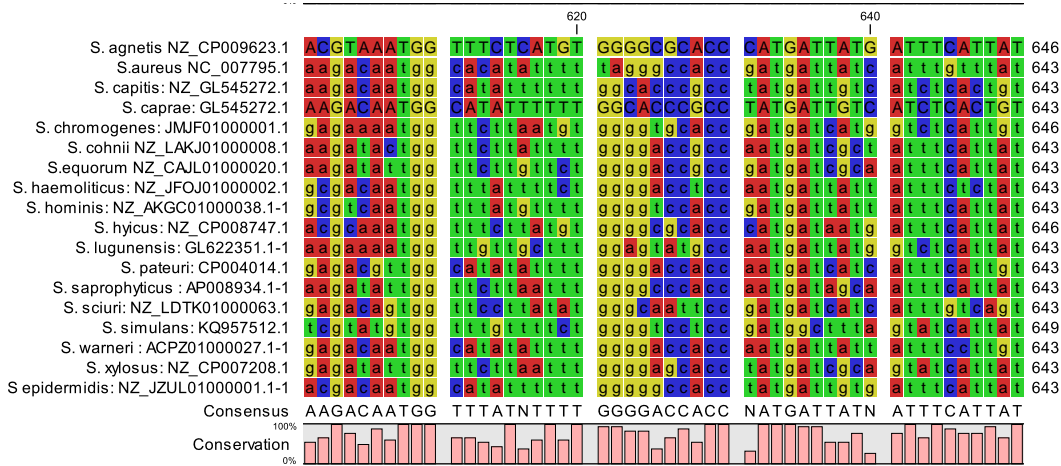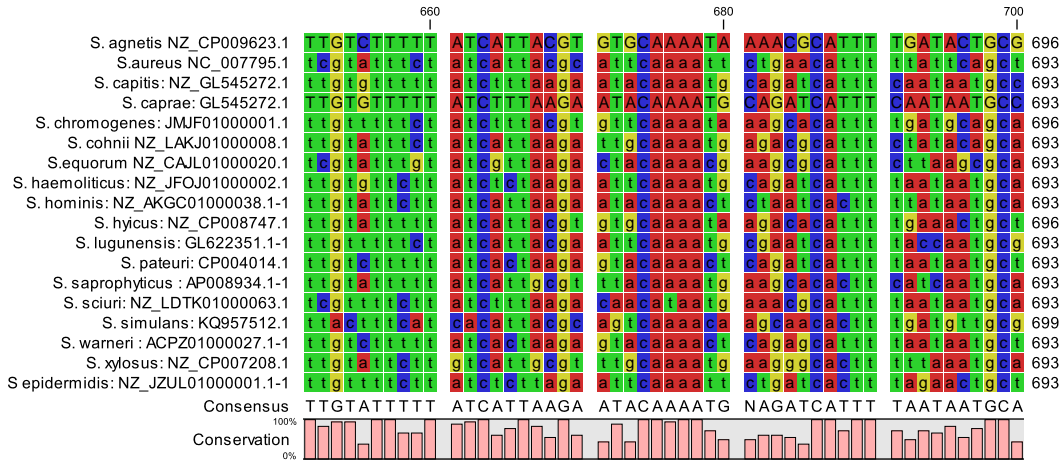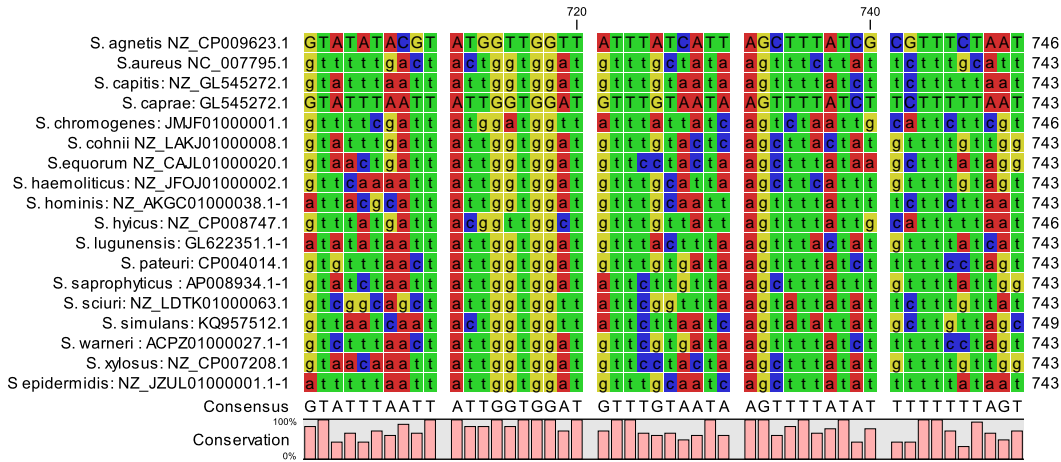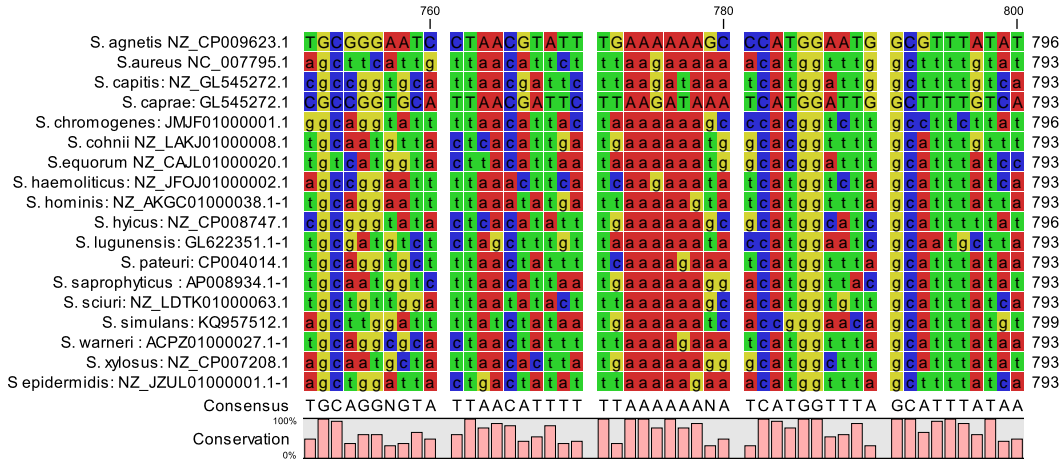

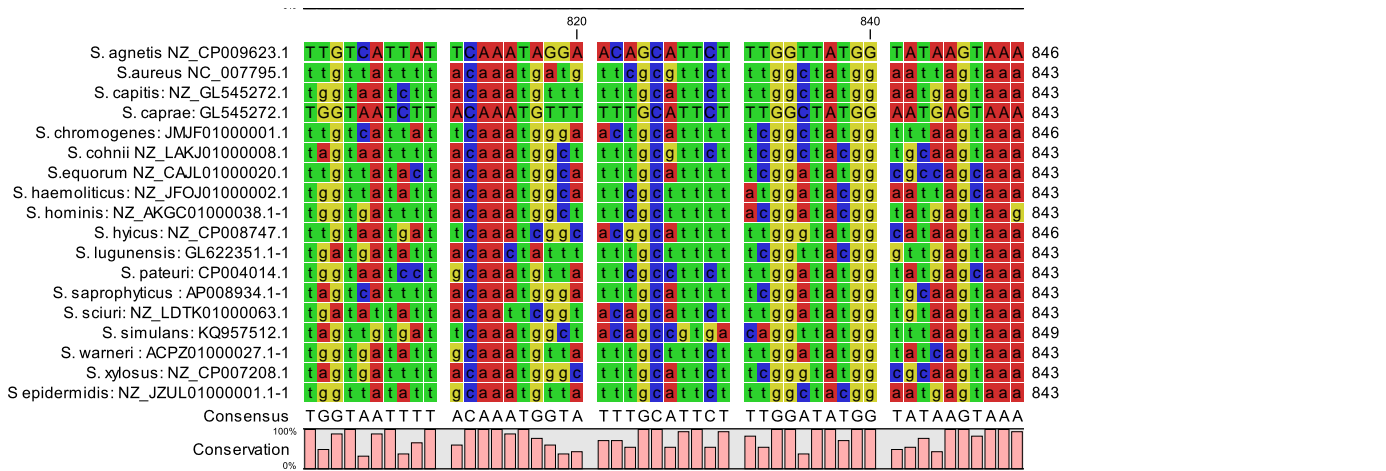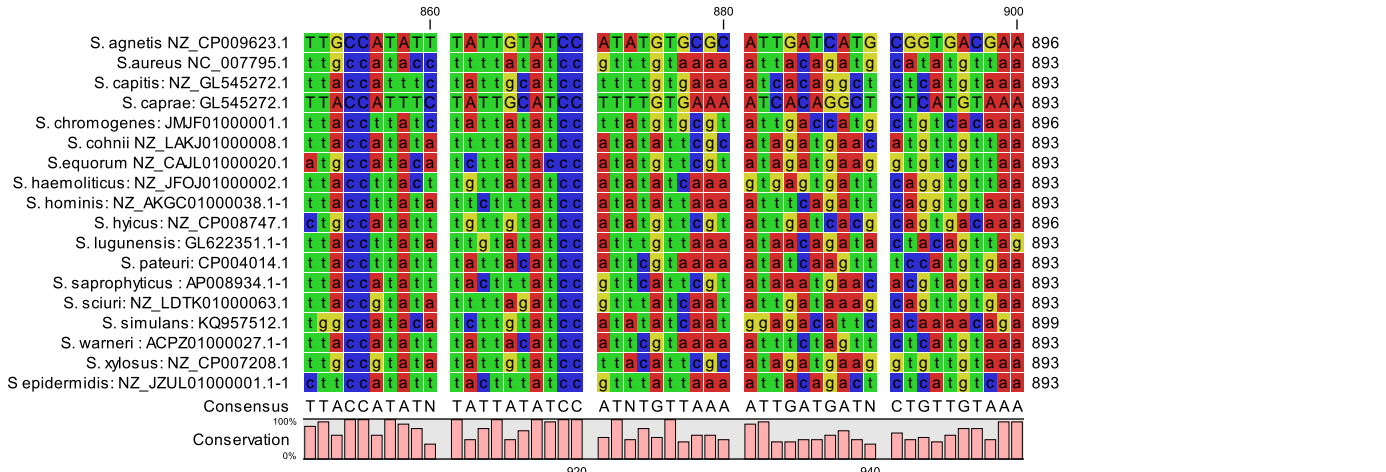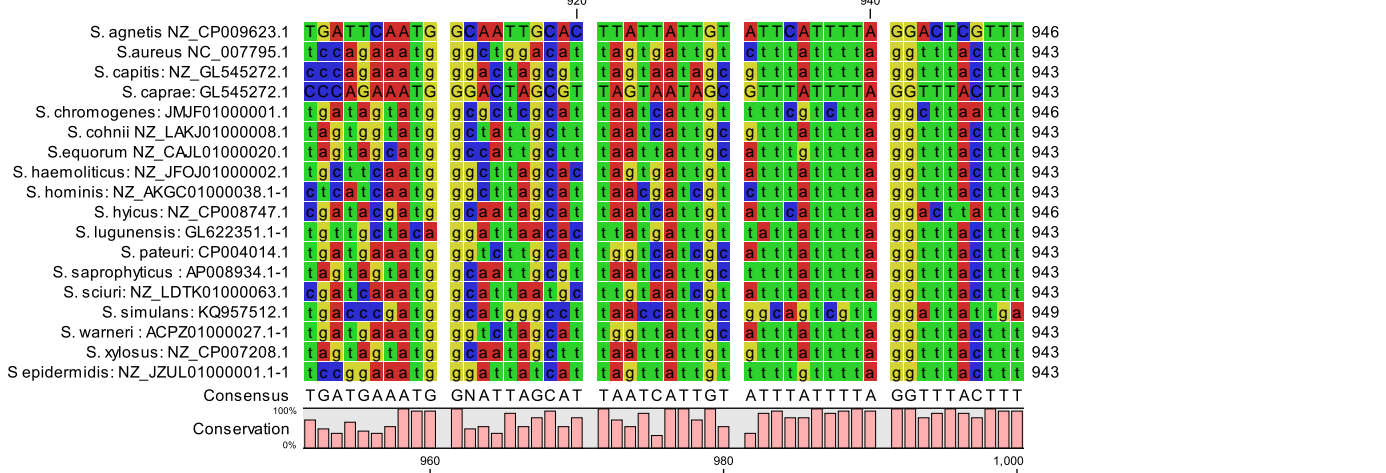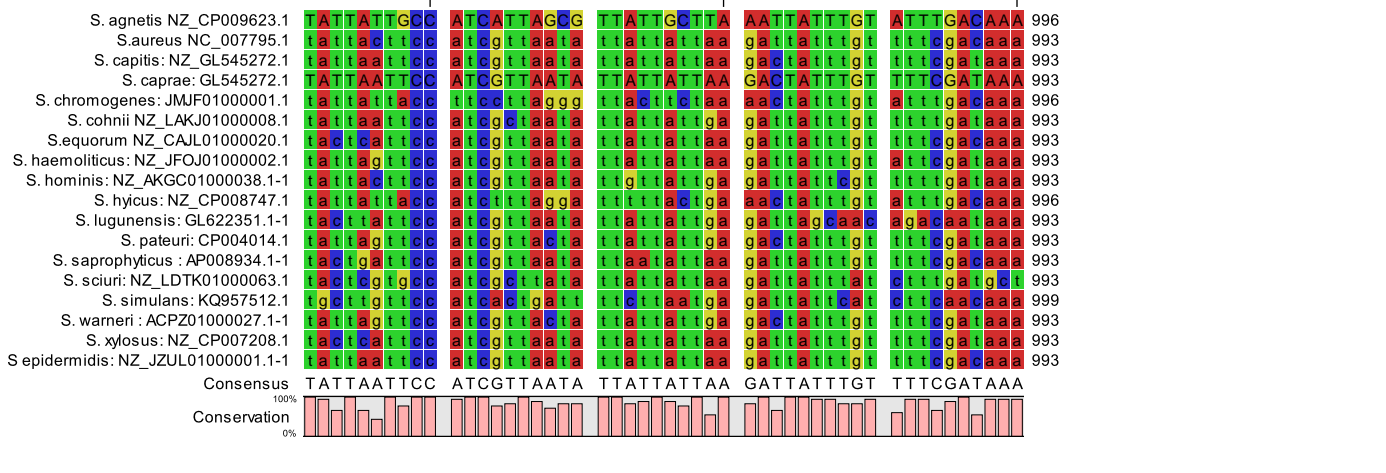

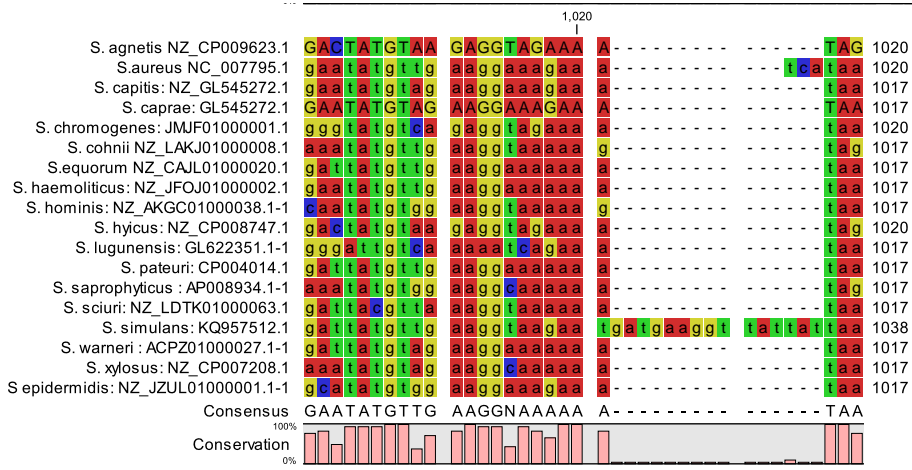

Supplement: 13104_2018_3449_MOESM2_ESM.pdf [file 13104_2018_3449_MOESM2_ESM.pdf]
