# Supplementary material for: Some coagulase negative Staphylococcus spp. isolated from buffalo can be misidentified as Staphylococcus aureus by phenotypic and Sa442 PCR methods
Source: PubMed Central journal article supplement (PMC5977496; doi:10.1186/s13104-018-3449-8), 2018-05-30
Supplement: 13104_2018_3449_MOESM1_ESM.pdf [file 13104_2018_3449_MOESM1_ESM.pdf]

|            |            |          |       |    |
|------------|------------|----------|-------|----|
| CP007670.1 | AATTACATTT | TGGAGGAA | TT    | 84 |
| CP003033.1 | AATTACATTT | TGGAGGAA | TT    | 84 |
| CP018205.1 | AATTACATTT | TGGAGGAA | TT    | 84 |
| AP017377.1 | AATTACATTT | TGGAGGAA | TT    | 84 |
| LT598688.1 | AATTACATTT | TGGAGGAA | TT    | 84 |
| CP007676.1 | AATTACATTT | TGGAGGAA | TT    | 84 |
| CP007672.1 | AATTACATTT | TGGAGGAA | TT    | 84 |
| CP007674.1 | AATTACATTT | TGGAGGAA | TT    | 84 |
| CP011526.1 | AATTACATTT | TGGAGGAA | TT    | 84 |
| HF937103.1 | AATTACATTT | TGGAGGAA | TT    | 84 |
| AP009351.1 | AATTACATTT | TGGAGGAA | TT    | 84 |
| CP000046.1 | AATTACATTT | TGGAGGAA | TT    | 84 |
| CP000253.1 | AATTACATTT | TGGAGGAA | TT    | 84 |
| AC025591.8 | AATTACATTT | TGGAGGAA | TT    | 84 |
| LT671859.1 | AATTACATTT | TGGAGGAA | TT    | 84 |
| CP007499.1 | AATTACATTT | TGGAGGAA | TT    | 84 |
| X17679.1   | AATTACATTT | TGGAGGAA | TT    | 84 |
| CP007657.1 | AATTACATTT | TGGAGGAA | TT    | 84 |
| CP014444.1 | AATTACATTT | TGGAGGAA | TT    | 84 |
| CP014441.1 | AATTACATTT | TGGAGGAA | TT    | 84 |
| CP014438.1 | AATTACATTT | TGGAGGAA | TT    | 84 |
| CP014435.1 | AATTACATTT | TGGAGGAA | TT    | 84 |
| CP014432.1 | AATTACATTT | TGGAGGAA | TT    | 84 |
| CP014429.1 | AATTACATTT | TGGAGGAA | TT    | 84 |
| CP014426.1 | AATTACATTT | TGGAGGAA | TT    | 84 |
| CP014423.1 | AATTACATTT | TGGAGGAA | TT    | 84 |
| CP014420.1 | AATTACATTT | TGGAGGAA | TT    | 84 |
| CP014415.1 | AATTACATTT | TGGAGGAA | TT    | 84 |
| CP014412.1 | AATTACATTT | TGGAGGAA | TT    | 84 |
| CP014409.1 | AATTACATTT | TGGAGGAA | TT    | 84 |
| CP014407.1 | AATTACATTT | TGGAGGAA | TT    | 84 |
| CP014402.1 | AATTACATTT | TGGAGGAA | TT    | 84 |
| CP014397.1 | AATTACATTT | TGGAGGAA | TT    | 84 |
| CP014392.1 | AATTACATTT | TGGAGGAA | TT    | 84 |
| CP014387.1 | AATTACATTT | TGGAGGAA | TT    | 84 |
| CP014384.1 | AATTACATTT | TGGAGGAA | TT    | 84 |
| CP014381.1 | AATTACATTT | TGGAGGAA | TT    | 84 |
| CP014371.1 | AATTACATTT | TGGAGGAA | TT    | 84 |
| CP014368.1 | AATTACATTT | TGGAGGAA | TT    | 84 |
| CP014365.1 | AATTACATTT | TGGAGGAA | TT    | 84 |
| CP014362.1 | AATTACATTT | TGGAGGAA | TT    | 84 |
| CP014376.1 | AATTACATTT | TGGAGGAA | TT    | 84 |
| CP009423.1 | AATTACATTT | TGGAGGAA | TT    | 84 |
| CP016855.1 | AATTACATTT | TGGAGGAA | TT    | 84 |
| CP013231.1 | AATTACATTT | TGGAGGAA | TT    | 84 |
| CP010300.1 | AATTACATTT | TGGAGGAA | TT    | 84 |
| CP010299.1 | AATTACATTT | TGGAGGAA | TT    | 84 |
| CP010298.1 | AATTACATTT | TGGAGGAA | TT    | 84 |
| CP010297.1 | AATTACATTT | TGGAGGAA | TT    | 84 |
| CP010296.1 | AATTACATTT | TGGAGGAA | TT    | 84 |
| CP010295.1 | AATTACATTT | TGGAGGAA | TT    | 84 |
| CP007690.1 | AATTACATTT | TGGAGGAA | TT    | 84 |
| CP007176.1 | AATTACATTT | TGGAGGAA | TT    | 84 |
| CP000730.1 | AATTACATTT | TGGAGGAA | TT    | 84 |
| CP000255.1 | AATTACATTT | TGGAGGAA | TT    | 84 |
| CP007539.1 | AATTACATTT | TGGAGGAA | TT    | 84 |
| CP007657.1 | AATTACATTT | TGGAGGAA | TT    | 85 |
| AP014921.1 | AATTACATTT | TGGAGGAA | TT    | 84 |
| AB436955.1 | -----      | -----    | ----- | -  |
| AB489885.1 | -----      | -----    | ----- | -  |
| AB489873.1 | -----      | -----    | ----- | -  |
| AB489883.1 | -----      | -----    | ----- | -  |
| AB489874.1 | -----      | -----    | ----- | -  |
| LT615218.1 | AATTACATTT | TGGAGGAA | TT    | 84 |
| AB436976.1 | AATTACATTT | TGGAGGAA | TT    | 84 |
| AB489892.1 | -----      | -----    | ----- | -  |
| AJ306908.1 | AATTACATTT | TGGAGGAA | TT    | 84 |
| CP015646.1 | AATTACATTT | TGGAGGAA | TT    | 84 |
| AB488510.1 | -----      | -----    | ----- | -  |
| EU105387.1 | AATTACATTT | TGGAGGAA | TT    | 24 |
| AB436975.1 | AATTACATTT | TGGAGGAA | TT    | 84 |
| AB488499.1 | -----      | -----    | ----- | -  |
| AJ309189.1 | -----      | -----    | ----- | -  |
| FR821779.1 | AATTACATTT | TGGAGGAA | TT    | 84 |
| CP012593.1 | -----      | -----    | ----- | -  |
| CP012692.1 | -----      | -----    | ----- | -  |
| CP013955.1 | -----      | -----    | ----- | -  |
| CP013953.1 | -----      | -----    | ----- | -  |
| CP014064.1 | -----      | -----    | ----- | -  |
| LT009690.1 | -----      | -----    | ----- | -  |
| AP017320.1 | -----      | -----    | ----- | -  |
| CP010890.1 | -----      | -----    | ----- | -  |
| CP001844.2 | -----      | -----    | ----- | -  |
| CP001781.1 | -----      | -----    | ----- | -  |
| AB488501.1 | -----      | -----    | ----- | -  |
| AB489898.1 | -----      | -----    | ----- | -  |
| HE579073.1 | -----      | -----    | ----- | -  |
| HE579071.1 | -----      | -----    | ----- | -  |
| HE579069.1 | -----      | -----    | ----- | -  |
| HE579065.1 | -----      | -----    | ----- | -  |
| HE579063.1 | -----      | -----    | ----- | -  |

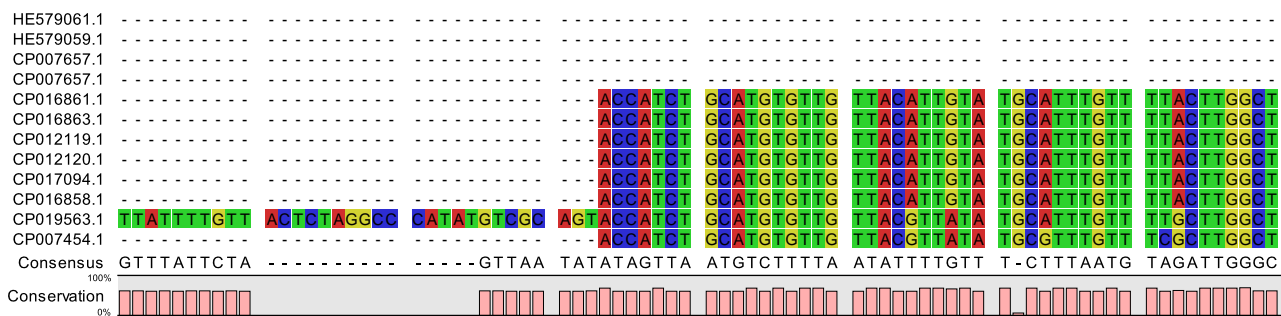

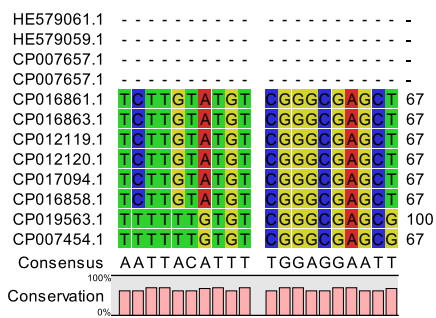



|            |       |     |
|------------|-------|-----|
| CP007670.1 | ----- | 159 |
| CP003033.1 | ----- | 159 |
| CP018205.1 | ----- | 159 |
| AP017377.1 | ----- | 159 |
| LT598688.1 | ----- | 159 |
| CP007676.1 | ----- | 159 |
| CP007672.1 | ----- | 159 |
| CP007674.1 | ----- | 159 |
| CP011526.1 | ----- | 159 |
| HF937103.1 | ----- | 159 |
| AP009351.1 | ----- | 159 |
| CP000046.1 | ----- | 159 |
| CP000253.1 | ----- | 159 |
| AC025591.8 | ----- | 159 |
| LT671859.1 | ----- | 159 |
| CP007499.1 | ----- | 159 |
| X17679.1   | ----- | 159 |
| CP007657.1 | ----- | 159 |
| CP014444.1 | ----- | 159 |
| CP014441.1 | ----- | 159 |
| CP014438.1 | ----- | 159 |
| CP014435.1 | ----- | 159 |
| CP014432.1 | ----- | 159 |
| CP014429.1 | ----- | 159 |
| CP014426.1 | ----- | 159 |
| CP014423.1 | ----- | 159 |
| CP014420.1 | ----- | 159 |
| CP014415.1 | ----- | 159 |
| CP014412.1 | ----- | 159 |
| CP014409.1 | ----- | 159 |
| CP014407.1 | ----- | 159 |
| CP014402.1 | ----- | 159 |
| CP014397.1 | ----- | 159 |
| CP014392.1 | ----- | 159 |
| CP014387.1 | ----- | 159 |
| CP014384.1 | ----- | 159 |
| CP014381.1 | ----- | 159 |
| CP014371.1 | ----- | 159 |
| CP014368.1 | ----- | 159 |
| CP014365.1 | ----- | 159 |
| CP014362.1 | ----- | 159 |
| CP014376.1 | ----- | 159 |
| CP009423.1 | ----- | 159 |
| CP016855.1 | ----- | 159 |
| CP013231.1 | ----- | 159 |
| CP010300.1 | ----- | 159 |
| CP010299.1 | ----- | 159 |
| CP010298.1 | ----- | 159 |
| CP010297.1 | ----- | 159 |
| CP010296.1 | ----- | 159 |
| CP010295.1 | ----- | 159 |
| CP007690.1 | ----- | 159 |
| CP007176.1 | ----- | 159 |
| CP000730.1 | ----- | 159 |
| CP000255.1 | ----- | 159 |
| CP007539.1 | ----- | 159 |
| CP007657.1 | ----- | 160 |
| AP014921.1 | ----- | 159 |
| AB436955.1 | ----- | 67  |
| AB489885.1 | ----- | 67  |
| AB489873.1 | ----- | 67  |
| AB489883.1 | ----- | 67  |
| AB489874.1 | ----- | 67  |
| LT615218.1 | ----- | 159 |
| AB436976.1 | ----- | 159 |
| AB489892.1 | ----- | 67  |
| AJ306908.1 | ----- | 159 |
| CP015646.1 | ----- | 159 |
| AB488510.1 | ----- | 67  |
| EU105387.1 | ----- | 99  |
| AB436975.1 | ----- | 159 |
| AB488499.1 | ----- | 67  |
| AJ309189.1 | ----- | -   |
| FR821779.1 | ----- | 159 |
| CP012593.1 | ----- | -   |
| CP012692.1 | ----- | -   |
| CP013955.1 | ----- | -   |
| CP013953.1 | ----- | -   |
| CP014064.1 | ----- | -   |
| LT009690.1 | ----- | -   |
| AP017320.1 | ----- | -   |
| CP010890.1 | ----- | -   |
| CP001844.2 | ----- | -   |
| CP001781.1 | ----- | -   |
| AB488501.1 | ----- | -   |
| AB489898.1 | ----- | -   |
| HE579073.1 | ----- | -   |
| HE579071.1 | ----- | -   |
| HE579069.1 | ----- | -   |
| HE579065.1 | ----- | -   |
| HE579063.1 | ----- | -   |

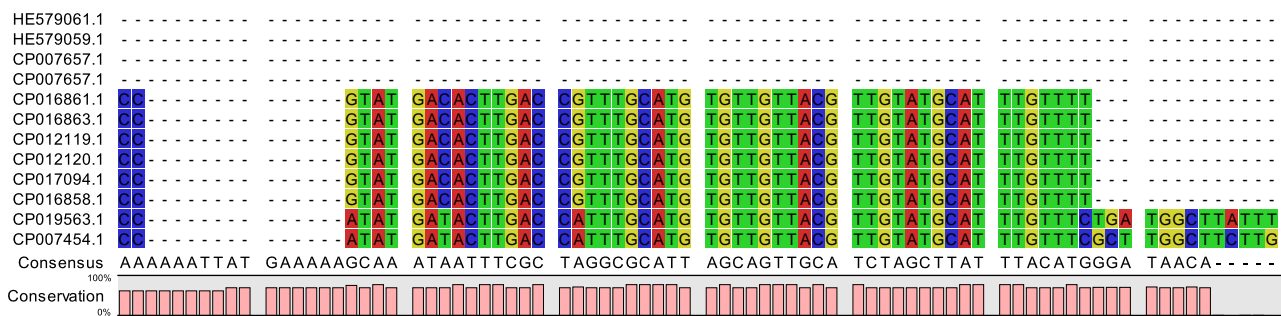

HE579061.1 - - - - -  
 HE579059.1 - - - - -  
 CP007657.1 - - - - -  
 CP007657.1 - - - - -  
 CP016861.1 - - - - - 120  
 CP016863.1 - - - - - 120  
 CP012119.1 - - - - - 120  
 CP012120.1 - - - - - 120  
 CP017094.1 - - - - - 120  
 CP016858.1 - - - - - 120  
 CP019563.1 **TGTGTGGG** **GAGGCCATA** 186  
 CP007454.1 **TATGTCGG** **GAGTCGTA** 153  
 Consensus - - - - -  
 Conservation 100%  
 0%





|            |              |            |     |
|------------|--------------|------------|-----|
| CP007670.1 | TTAA TGCT -G | GGAGTAAAAA | 223 |
| CP003033.1 | TTAA TGCT -G | GGAGTAAAAA | 223 |
| CP018205.1 | TTAA TGCT -G | GGAGTAAAAA | 223 |
| AP017377.1 | TTAA TGCT -G | GGAGTAAAAA | 223 |
| LT598688.1 | TTAA TGCT -G | GGAGTAAAAA | 223 |
| CP007676.1 | TTAA TGCT -G | GGAGTAAAAA | 223 |
| CP007672.1 | TTAA TGCT -G | GGAGTAAAAA | 223 |
| CP007674.1 | TTAA TGCT -G | GGAGTAAAAA | 223 |
| CP011526.1 | TTAA TGCT -G | GGAGTAAAAA | 223 |
| HF937103.1 | TTAA TGCT -G | GGAGTAAAAA | 223 |
| AP009351.1 | TTAA TGCT -G | GGAGTAAAAA | 223 |
| CP000046.1 | TTAA TGCT -G | GGAGTAAAAA | 223 |
| CP000253.1 | TTAA TGCT -G | GGAGTAAAAA | 223 |
| AC025591.8 | TTAA TGCT -G | GGAGTAAAAA | 223 |
| LT671859.1 | TTAA TGCT -G | GGAGTAAAAA | 223 |
| CP007499.1 | TTAA TGCT -G | GGAGTAAAAA | 223 |
| X17679.1   | TTAA TGCT -G | GGAGTAAAAA | 223 |
| CP007657.1 | TTAA TGCT -G | GGAGTAAAAA | 223 |
| CP014444.1 | TTAA TGCT -G | GGAGTAAAAA | 223 |
| CP014441.1 | TTAA TGCT -G | GGAGTAAAAA | 223 |
| CP014438.1 | TTAA TGCT -G | GGAGTAAAAA | 223 |
| CP014435.1 | TTAA TGCT -G | GGAGTAAAAA | 223 |
| CP014432.1 | TTAA TGCT -G | GGAGTAAAAA | 223 |
| CP014429.1 | TTAA TGCT -G | GGAGTAAAAA | 223 |
| CP014426.1 | TTAA TGCT -G | GGAGTAAAAA | 223 |
| CP014423.1 | TTAA TGCT -G | GGAGTAAAAA | 223 |
| CP014420.1 | TTAA TGCT -G | GGAGTAAAAA | 223 |
| CP014415.1 | TTAA TGCT -G | GGAGTAAAAA | 223 |
| CP014412.1 | TTAA TGCT -G | GGAGTAAAAA | 223 |
| CP014409.1 | TTAA TGCT -G | GGAGTAAAAA | 223 |
| CP014407.1 | TTAA TGCT -G | GGAGTAAAAA | 223 |
| CP014402.1 | TTAA TGCT -G | GGAGTAAAAA | 223 |
| CP014397.1 | TTAA TGCT -G | GGAGTAAAAA | 223 |
| CP014392.1 | TTAA TGCT -G | GGAGTAAAAA | 223 |
| CP014387.1 | TTAA TGCT -G | GGAGTAAAAA | 223 |
| CP014384.1 | TTAA TGCT -G | GGAGTAAAAA | 223 |
| CP014381.1 | TTAA TGCT -G | GGAGTAAAAA | 223 |
| CP014371.1 | TTAA TGCT -G | GGAGTAAAAA | 223 |
| CP014368.1 | TTAA TGCT -G | GGAGTAAAAA | 223 |
| CP014365.1 | TTAA TGCT -G | GGAGTAAAAA | 223 |
| CP014362.1 | TTAA TGCT -G | GGAGTAAAAA | 223 |
| CP014376.1 | TTAA TGCT -G | GGAGTAAAAA | 223 |
| CP009423.1 | TTAA TGCT -G | GGAGTAAAAA | 223 |
| CP016855.1 | TTAA TGCT -G | GGAGTAAAAA | 223 |
| CP013231.1 | TTAA TGCT -G | GGAGTAAAAA | 223 |
| CP010300.1 | TTAA TGCT -G | GGAGTAAAAA | 223 |
| CP010299.1 | TTAA TGCT -G | GGAGTAAAAA | 223 |
| CP010298.1 | TTAA TGCT -G | GGAGTAAAAA | 223 |
| CP010297.1 | TTAA TGCT -G | GGAGTAAAAA | 223 |
| CP010296.1 | TTAA TGCT -G | GGAGTAAAAA | 223 |
| CP010295.1 | TTAA TGCT -G | GGAGTAAAAA | 223 |
| CP007690.1 | TTAA TGCT -G | GGAGTAAAAA | 223 |
| CP007176.1 | TTAA TGCT -G | GGAGTAAAAA | 223 |
| CP000730.1 | TTAA TGCT -G | GGAGTAAAAA | 223 |
| CP000255.1 | TTAA TGCT -G | GGAGTAAAAA | 223 |
| CP007539.1 | TTAA TGCT -G | GGAGTAAAAA | 223 |
| CP007657.1 | TTAA TGCT -G | GGAGTAAAAA | 224 |
| AP014921.1 | TTAA TGCT -G | GGAGTAAAAA | 223 |
| AB436955.1 | TTAA TGCT -G | GGAGTAAAAA | 131 |
| AB489885.1 | TTAA TGCT -G | GGAGTAAAAA | 131 |
| AB489873.1 | TTAA TGCT -G | GGAGTAAAAA | 131 |
| AB489883.1 | TTAA TGCT -G | GGAGTAAAAA | 131 |
| AB489874.1 | TTAA TGCT -G | GGAGTAAAAA | 131 |
| LT615218.1 | TTAA TGCT -G | GGAGTAAAAA | 223 |
| AB436976.1 | TTAA TGCT -G | GGAGTAAAAA | 223 |
| AB489892.1 | TTAA TGCT -G | GGAGTAAAAA | 131 |
| AJ306908.1 | TTAA TGCT -G | GGAGTAAAAA | 223 |
| CP015646.1 | TTAA TGCT -G | GGAGTAAAAA | 223 |
| AB488510.1 | TTAA TGCT -G | GGAGTAAAAA | 131 |
| EU105387.1 | TTAA TGCT -G | GGAGTAAAAA | 163 |
| AB436975.1 | TTAA TGCT -G | GGAGTAAAAA | 223 |
| AB488499.1 | TTAA TGCT -G | GGAGTAAAAA | 131 |
| AJ309189.1 | TTAA TGCT -G | GGAGTAAAAA | 47  |
| FR821779.1 | TGAA TGAG -A | ACAGTAAAAA | 223 |
| CP012593.1 | -----        | -----      | -   |
| CP012692.1 | -----        | -----      | -   |
| CP013955.1 | -----        | -----      | -   |
| CP013953.1 | -----        | -----      | -   |
| CP014064.1 | -----        | -----      | -   |
| LT009690.1 | -----        | -----      | -   |
| AP017320.1 | -----        | -----      | -   |
| CP010890.1 | -----        | -----      | -   |
| CP001844.2 | -----        | -----      | -   |
| CP001781.1 | -----        | -----      | -   |
| AB488501.1 | -----        | -----      | -   |
| AB489898.1 | -----        | -----      | -   |
| HE579073.1 | -----        | -----      | -   |
| HE579071.1 | -----        | -----      | -   |
| HE579069.1 | -----        | -----      | -   |
| HE579065.1 | -----        | -----      | -   |
| HE579063.1 | -----        | -----      | -   |

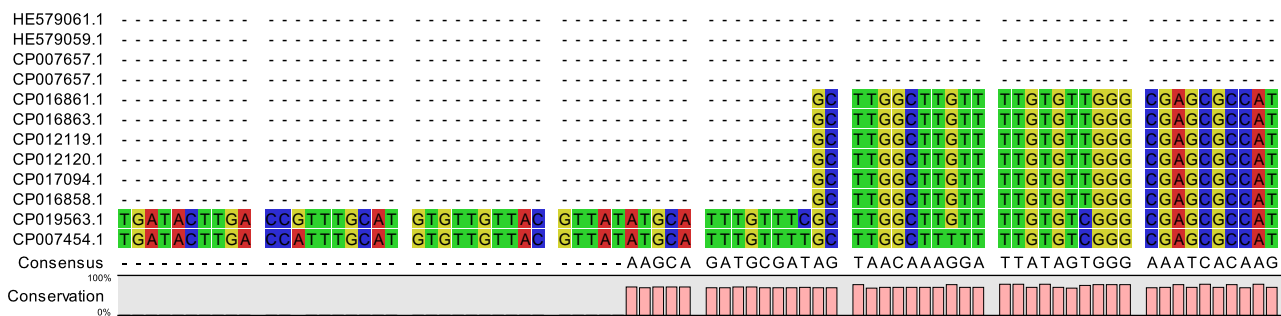

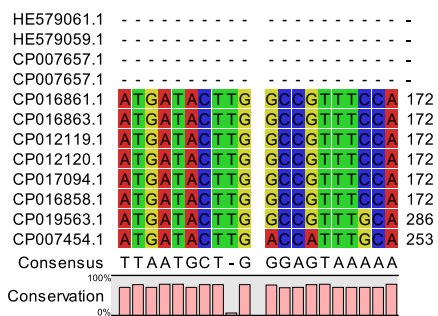



400

|            |            |            |     |
|------------|------------|------------|-----|
| CP007670.1 | TAACTAATAA | ATATGAATAT | 320 |
| CP003033.1 | TAACTAATAA | ATATGAATAT | 320 |
| CP018205.1 | TAACTAATAA | ATATGAATAT | 320 |
| AP017377.1 | TAACTAATAA | ATATGAATAT | 320 |
| LT598688.1 | TAACTAATAA | ATATGAATAT | 320 |
| CP007676.1 | TAACTAATAA | ATATGAATAT | 320 |
| CP007672.1 | TAACTAATAA | ATATGAATAT | 320 |
| CP007674.1 | TAACTAATAA | ATATGAATAT | 320 |
| CP011526.1 | TAACTAATAA | ATATGAATAT | 320 |
| HF937103.1 | TAACTAATAA | ATATGAATAT | 320 |
| AP009351.1 | TAACTAATAA | ATATGAATAT | 320 |
| CP000046.1 | TAACTAATAA | ATATGAATAT | 320 |
| CP000253.1 | TAACTAATAA | ATATGAATAT | 320 |
| AC025591.8 | TAACTAATAA | ATATGAATAT | 320 |
| LT671859.1 | TAACTAATAA | ATATGAATAT | 320 |
| CP007499.1 | TAACTAATAA | ATATGAATAT | 320 |
| X17679.1   | TAACTAATAA | ATATGAATAT | 320 |
| CP007657.1 | TAACTAATAA | ATATGAATAT | 320 |
| CP014444.1 | TAACTAATAA | ATATGAATAT | 320 |
| CP014441.1 | TAACTAATAA | ATATGAATAT | 320 |
| CP014438.1 | TAACTAATAA | ATATGAATAT | 320 |
| CP014435.1 | TAACTAATAA | ATATGAATAT | 320 |
| CP014432.1 | TAACTAATAA | ATATGAATAT | 320 |
| CP014429.1 | TAACTAATAA | ATATGAATAT | 320 |
| CP014426.1 | TAACTAATAA | ATATGAATAT | 320 |
| CP014423.1 | TAACTAATAA | ATATGAATAT | 320 |
| CP014420.1 | TAACTAATAA | ATATGAATAT | 320 |
| CP014415.1 | TAACTAATAA | ATATGAATAT | 320 |
| CP014412.1 | TAACTAATAA | ATATGAATAT | 320 |
| CP014409.1 | TAACTAATAA | ATATGAATAT | 320 |
| CP014407.1 | TAACTAATAA | ATATGAATAT | 320 |
| CP014402.1 | TAACTAATAA | ATATGAATAT | 320 |
| CP014397.1 | TAACTAATAA | ATATGAATAT | 320 |
| CP014392.1 | TAACTAATAA | ATATGAATAT | 320 |
| CP014387.1 | TAACTAATAA | ATATGAATAT | 320 |
| CP014384.1 | TAACTAATAA | ATATGAATAT | 320 |
| CP014381.1 | TAACTAATAA | ATATGAATAT | 320 |
| CP014371.1 | TAACTAATAA | ATATGAATAT | 320 |
| CP014368.1 | TAACTAATAA | ATATGAATAT | 320 |
| CP014365.1 | TAACTAATAA | ATATGAATAT | 320 |
| CP014362.1 | TAACTAATAA | ATATGAATAT | 320 |
| CP014376.1 | TAACTAATAA | ATATGAATAT | 320 |
| CP009423.1 | TAACTAATAA | ATATGAATAT | 320 |
| CP016855.1 | TAACTAATAA | ATATGAATAT | 320 |
| CP013231.1 | TAACTAATAA | ATATGAATAT | 320 |
| CP010300.1 | TAACTAATAA | ATATGAATAT | 320 |
| CP010299.1 | TAACTAATAA | ATATGAATAT | 320 |
| CP010298.1 | TAACTAATAA | ATATGAATAT | 320 |
| CP010297.1 | TAACTAATAA | ATATGAATAT | 320 |
| CP010296.1 | TAACTAATAA | ATATGAATAT | 320 |
| CP010295.1 | TAACTAATAA | ATATGAATAT | 320 |
| CP007690.1 | TAACTAATAA | ATATGAATAT | 320 |
| CP007176.1 | TAACTAATAA | ATATGAATAT | 320 |
| CP000730.1 | TAACTAATAA | ATATGAATAT | 320 |
| CP000255.1 | TAACTAATAA | ATATGAATAT | 320 |
| CP007539.1 | TAACTAATAA | ATATGAATAT | 320 |
| CP007657.1 | TAACTAATAA | ATATGAATAT | 321 |
| AP014921.1 | TAACTAATAA | ATATGAATAT | 320 |
| AB436955.1 | TAACTAATAA | ATATGAATAT | 228 |
| AB489885.1 | TAACTAATAA | ATATGAATAT | 228 |
| AB489873.1 | TAACTAATAA | ATATGAATAT | 228 |
| AB489883.1 | TAACTAATAA | ATATGAATAT | 228 |
| AB489874.1 | TAACTAATAA | ATATGAATAT | 228 |
| LT615218.1 | TAACTAATAA | ATATGAATAT | 320 |
| AB436976.1 | TAACTAATAA | ATATGAATAT | 320 |
| AB489892.1 | TAACTAATAA | ATATGAATAT | 228 |
| AJ306908.1 | TAACTAATAA | ATATGAATAT | 320 |
| CP015646.1 | TAACTAATAA | ATATGAATAT | 320 |
| AB488510.1 | TAACTAATAA | ATATGAATAT | 228 |
| EU105387.1 | TAACTAATAA | ATATGAATAT | 260 |
| AB436975.1 | TAACTAATAA | ATATGAATAT | 320 |
| AB488499.1 | TAACTAATAA | ATATGAATAT | 228 |
| AJ309189.1 | TAACTAATAA | ATATGAATAT | 144 |
| FR821779.1 | TATTGGAGGA | TTATAAATAT | 320 |
| CP012593.1 | -----      | -----      | -   |
| CP012692.1 | -----      | -----      | -   |
| CP013955.1 | -----      | -----      | -   |
| CP013953.1 | -----      | -----      | -   |
| CP014064.1 | -----      | -----      | -   |
| LT009690.1 | -----      | -----      | -   |
| AP017320.1 | -----      | -----      | -   |
| CP010890.1 | -----      | -----      | -   |
| CP001844.2 | -----      | -----      | -   |
| CP001781.1 | -----      | -----      | -   |
| AB488501.1 | -----      | -----      | -   |
| AB489898.1 | -----      | -----      | -   |
| HE579073.1 | -----      | -----      | -   |
| HE579071.1 | -----      | -----      | -   |
| HE579069.1 | -----      | -----      | -   |
| HE579065.1 | -----      | -----      | -   |
| HE579063.1 | -----      | -----      | -   |

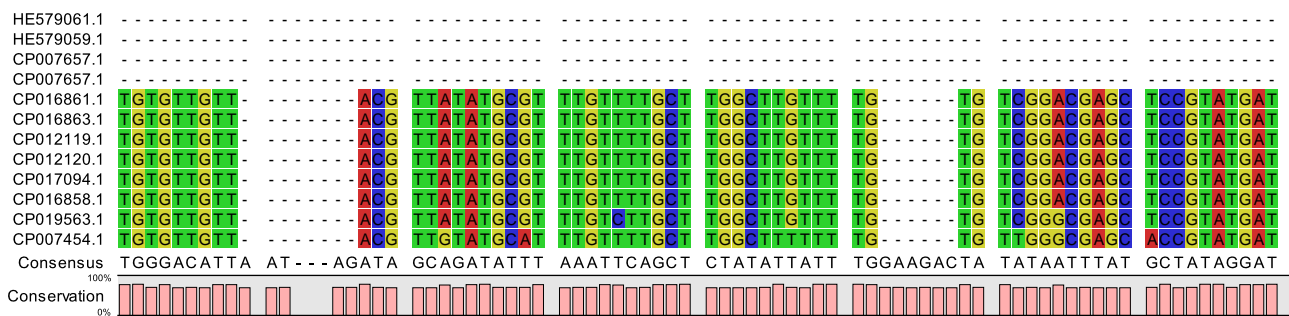

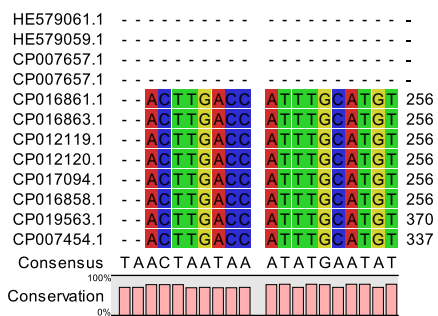



|            | 420        | 440        | 460     | 480   |
|------------|------------|------------|---------|-------|
| CP007670.1 | GGAGATAATA | TTTATAAAGA | AGCTAAA | ----- |
| CP003033.1 | GGAGATAATA | TTTATAAAGA | AGCTAAA | ----- |
| CP018205.1 | GGAGATAATA | TTTATAAAGA | AGCTAAA | ----- |
| AP017377.1 | GGAGATAATA | TTTATAAAGA | AGCTAAA | ----- |
| LT598688.1 | GGAGATAATA | TTTATAAAGA | AGCTAAA | ----- |
| CP007676.1 | GGAGATAATA | TTTATAAAGA | AGCTAAA | ----- |
| CP007672.1 | GGAGATAATA | TTTATAAAGA | AGCTAAA | ----- |
| CP007674.1 | GGAGATAATA | TTTATAAAGA | AGCTAAA | ----- |
| CP011526.1 | GGAGATAATA | TTTATAAAGA | AGCTAAA | ----- |
| HF937103.1 | GGAGATAATA | TTTATAAAGA | AGCTAAA | ----- |
| AP009351.1 | GGAGATAATA | TTTATAAAGA | AGCTAAA | ----- |
| CP000046.1 | GGAGATAATA | TTTATAAAGA | AGCTAAA | ----- |
| CP000253.1 | GGAGATAATA | TTTATAAAGA | AGCTAAA | ----- |
| AC025591.8 | GGAGATAATA | TTTATAAAGA | AGCTAAA | ----- |
| LT671859.1 | GGAGATAATA | TTTATAAAGA | AGCTAAA | ----- |
| CP007499.1 | GGAGATAATA | TTTATAAAGA | AGCTAAA | ----- |
| X17679.1   | GGAGATAATA | TTTATAAAGA | AGCTAAA | ----- |
| CP007657.1 | GGAGATAATA | TTTATAAAGA | AGCTAAA | ----- |
| CP014444.1 | GGAGATAATA | TTTATAAAGA | AGCTAAA | ----- |
| CP014441.1 | GGAGATAATA | TTTATAAAGA | AGCTAAA | ----- |
| CP014438.1 | GGAGATAATA | TTTATAAAGA | AGCTAAA | ----- |
| CP014435.1 | GGAGATAATA | TTTATAAAGA | AGCTAAA | ----- |
| CP014432.1 | GGAGATAATA | TTTATAAAGA | AGCTAAA | ----- |
| CP014429.1 | GGAGATAATA | TTTATAAAGA | AGCTAAA | ----- |
| CP014426.1 | GGAGATAATA | TTTATAAAGA | AGCTAAA | ----- |
| CP014423.1 | GGAGATAATA | TTTATAAAGA | AGCTAAA | ----- |
| CP014420.1 | GGAGATAATA | TTTATAAAGA | AGCTAAA | ----- |
| CP014415.1 | GGAGATAATA | TTTATAAAGA | AGCTAAA | ----- |
| CP014412.1 | GGAGATAATA | TTTATAAAGA | AGCTAAA | ----- |
| CP014409.1 | GGAGATAATA | TTTATAAAGA | AGCTAAA | ----- |
| CP014407.1 | GGAGATAATA | TTTATAAAGA | AGCTAAA | ----- |
| CP014402.1 | GGAGATAATA | TTTATAAAGA | AGCTAAA | ----- |
| CP014397.1 | GGAGATAATA | TTTATAAAGA | AGCTAAA | ----- |
| CP014392.1 | GGAGATAATA | TTTATAAAGA | AGCTAAA | ----- |
| CP014387.1 | GGAGATAATA | TTTATAAAGA | AGCTAAA | ----- |
| CP014384.1 | GGAGATAATA | TTTATAAAGA | AGCTAAA | ----- |
| CP014381.1 | GGAGATAATA | TTTATAAAGA | AGCTAAA | ----- |
| CP014371.1 | GGAGATAATA | TTTATAAAGA | AGCTAAA | ----- |
| CP014368.1 | GGAGATAATA | TTTATAAAGA | AGCTAAA | ----- |
| CP014365.1 | GGAGATAATA | TTTATAAAGA | AGCTAAA | ----- |
| CP014362.1 | GGAGATAATA | TTTATAAAGA | AGCTAAA | ----- |
| CP014376.1 | GGAGATAATA | TTTATAAAGA | AGCTAAA | ----- |
| CP009423.1 | GGAGATAATA | TTTATAAAGA | AGCTAAA | ----- |
| CP016855.1 | GGAGATAATA | TTTATAAAGA | AGCTAAA | ----- |
| CP013231.1 | GGAGATAATA | TTTATAAAGA | AGCTAAA | ----- |
| CP010300.1 | GGAGATAATA | TTTATAAAGA | AGCTAAA | ----- |
| CP010299.1 | GGAGATAATA | TTTATAAAGA | AGCTAAA | ----- |
| CP010298.1 | GGAGATAATA | TTTATAAAGA | AGCTAAA | ----- |
| CP010297.1 | GGAGATAATA | TTTATAAAGA | AGCTAAA | ----- |
| CP010296.1 | GGAGATAATA | TTTATAAAGA | AGCTAAA | ----- |
| CP010295.1 | GGAGATAATA | TTTATAAAGA | AGCTAAA | ----- |
| CP007690.1 | GGAGATAATA | TTTATAAAGA | AGCTAAA | ----- |
| CP007176.1 | GGAGATAATA | TTTATAAAGA | AGCTAAA | ----- |
| CP000730.1 | GGAGATAATA | TTTATAAAGA | AGCTAAA | ----- |
| CP000255.1 | GGAGATAATA | TTTATAAAGA | AGCTAAA | ----- |
| CP007539.1 | GGAGATAATA | TTTATAAAGA | AGCTAAA | ----- |
| CP007657.1 | GGAGATAATA | TTTATAAAGA | AGCTAAA | ----- |
| AP014921.1 | GGAGATAATA | TTTATAAAGA | AGCTAAA | ----- |
| AB436955.1 | GGAGATAATA | TTTATAAAGA | AGCTAAA | ----- |
| AB489885.1 | GGAGATAATA | TTTATAAAGA | AGCTAAA | ----- |
| AB489873.1 | GGAGATAATA | TTTATAAAGA | AGCTAAA | ----- |
| AB489883.1 | GGAGATAATA | TTTATAAAGA | AGCTAAA | ----- |
| AB489874.1 | GGAGATAATA | TTTATAAAGA | AGCTAAA | ----- |
| LT615218.1 | GGAGATAATA | TTTATAAAGA | AGCTAAA | ----- |
| AB436976.1 | GGAGATAATA | TTTATAAAGA | AGCTAAA | ----- |
| AB489892.1 | GGAGATAATA | TTTATAAAGA | AGCTAAA | ----- |
| AJ306908.1 | GGAGATAATA | TTTATAAAGA | AGCTAAA | ----- |
| CP015646.1 | GGAGATAATA | TTTATAAAGA | AGCTAAA | ----- |
| AB488510.1 | GGAGATAATA | TTTATAAAGA | AGCTAAA | ----- |
| EU105387.1 | GGAGATAATA | TTTATAAAGA | AGCTAAA | ----- |
| AB436975.1 | GGAGATAATA | TTTATAAAGA | AGCTAAA | ----- |
| AB488499.1 | GGAGATAATA | TTTATAAAGA | AGCTAAA | ----- |
| AJ309189.1 | GGAGATAATA | TTTATAAAGA | AGCTAAA | ----- |
| FR821779.1 | GGAGATCCTA | TCTATAAAGA | AGCGAAA | ----- |
| CP012593.1 | -----      | -----      | -----   | ----- |
| CP012692.1 | -----      | -----      | -----   | ----- |
| CP013955.1 | -----      | -----      | -----   | ----- |
| CP013953.1 | -----      | -----      | -----   | ----- |
| CP014064.1 | -----      | -----      | -----   | ----- |
| LT009690.1 | -----      | -----      | -----   | ----- |
| AP017320.1 | -----      | -----      | -----   | ----- |
| CP010890.1 | -----      | -----      | -----   | ----- |
| CP001844.2 | -----      | -----      | -----   | ----- |
| CP001781.1 | -----      | -----      | -----   | ----- |
| AB488501.1 | -----      | -----      | -----   | ----- |
| AB489898.1 | -----      | -----      | -----   | ----- |
| HE579073.1 | -----      | -----      | -----   | ----- |
| HE579071.1 | -----      | -----      | -----   | ----- |
| HE579069.1 | -----      | -----      | -----   | ----- |
| HE579065.1 | -----      | -----      | -----   | ----- |
| HE579063.1 | -----      | -----      | -----   | ----- |

|            |       |     |
|------------|-------|-----|
| CP007670.1 | ----- | 347 |
| CP003033.1 | ----- | 347 |
| CP018205.1 | ----- | 347 |
| AP017377.1 | ----- | 347 |
| LT598688.1 | ----- | 347 |
| CP007676.1 | ----- | 347 |
| CP007672.1 | ----- | 347 |
| CP007674.1 | ----- | 347 |
| CP011526.1 | ----- | 347 |
| HF937103.1 | ----- | 347 |
| AP009351.1 | ----- | 347 |
| CP000046.1 | ----- | 347 |
| CP000253.1 | ----- | 347 |
| AC025591.8 | ----- | 347 |
| LT671859.1 | ----- | 347 |
| CP007499.1 | ----- | 347 |
| X17679.1   | ----- | 347 |
| CP007657.1 | ----- | 347 |
| CP014444.1 | ----- | 347 |
| CP014441.1 | ----- | 347 |
| CP014438.1 | ----- | 347 |
| CP014435.1 | ----- | 347 |
| CP014432.1 | ----- | 347 |
| CP014429.1 | ----- | 347 |
| CP014426.1 | ----- | 347 |
| CP014423.1 | ----- | 347 |
| CP014420.1 | ----- | 347 |
| CP014415.1 | ----- | 347 |
| CP014412.1 | ----- | 347 |
| CP014409.1 | ----- | 347 |
| CP014407.1 | ----- | 347 |
| CP014402.1 | ----- | 347 |
| CP014397.1 | ----- | 347 |
| CP014392.1 | ----- | 347 |
| CP014387.1 | ----- | 347 |
| CP014384.1 | ----- | 347 |
| CP014381.1 | ----- | 347 |
| CP014371.1 | ----- | 347 |
| CP014368.1 | ----- | 347 |
| CP014365.1 | ----- | 347 |
| CP014362.1 | ----- | 347 |
| CP014376.1 | ----- | 347 |
| CP009423.1 | ----- | 347 |
| CP016855.1 | ----- | 347 |
| CP013231.1 | ----- | 347 |
| CP010300.1 | ----- | 347 |
| CP010299.1 | ----- | 347 |
| CP010298.1 | ----- | 347 |
| CP010297.1 | ----- | 347 |
| CP010296.1 | ----- | 347 |
| CP010295.1 | ----- | 347 |
| CP007690.1 | ----- | 347 |
| CP007176.1 | ----- | 347 |
| CP000730.1 | ----- | 347 |
| CP000255.1 | ----- | 347 |
| CP007539.1 | ----- | 347 |
| CP007657.1 | ----- | 348 |
| AP014921.1 | ----- | 347 |
| AB436955.1 | ----- | 255 |
| AB489885.1 | ----- | 255 |
| AB489873.1 | ----- | 255 |
| AB489883.1 | ----- | 255 |
| AB489874.1 | ----- | 255 |
| LT615218.1 | ----- | 347 |
| AB436976.1 | ----- | 347 |
| AB489892.1 | ----- | 255 |
| AJ306908.1 | ----- | 347 |
| CP015646.1 | ----- | 347 |
| AB488510.1 | ----- | 255 |
| EU105387.1 | ----- | 287 |
| AB436975.1 | ----- | 347 |
| AB488499.1 | ----- | 255 |
| AJ309189.1 | ----- | 171 |
| FR821779.1 | ----- | 347 |
| CP012593.1 | ----- | -   |
| CP012692.1 | ----- | -   |
| CP013955.1 | ----- | -   |
| CP013953.1 | ----- | -   |
| CP014064.1 | ----- | -   |
| LT009690.1 | ----- | -   |
| AP017320.1 | ----- | -   |
| CP010890.1 | ----- | -   |
| CP001844.2 | ----- | -   |
| CP001781.1 | ----- | -   |
| AB488501.1 | ----- | -   |
| AB489898.1 | ----- | -   |
| HE579073.1 | ----- | -   |
| HE579071.1 | ----- | -   |
| HE579069.1 | ----- | -   |
| HE579065.1 | ----- | -   |
| HE579063.1 | ----- | -   |

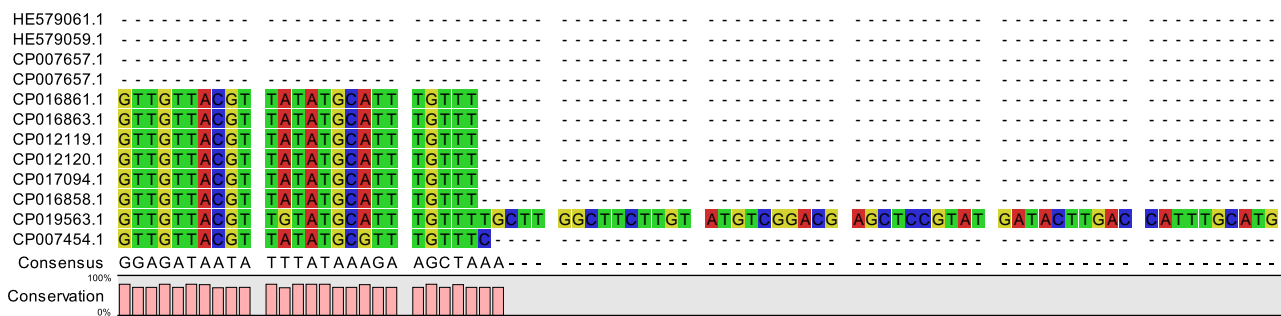

```

HE579061.1 - - - - -
HE579059.1 - - - - -
CP007657.1 - - - - -
CP007657.1 - - - - -
CP016861.1 - - - - - 281
CP016863.1 - - - - - 281
CP012119.1 - - - - - 281
CP012120.1 - - - - - 281
CP017094.1 - - - - - 281
CP016858.1 - - - - - 281
CP019563.1 TGTGTACG TTATGCGT 470
CP007454.1 - - - - - 363
Consensus - - - - -
Conservation 100%
0%

```

|            | 520 | 540 | 560 | 580 |
|------------|-----|-----|-----|-----|
| CP007670.1 |     |     |     |     |
| CP003033.1 |     |     |     |     |
| CP018205.1 |     |     |     |     |
| AP017377.1 |     |     |     |     |
| LT598688.1 |     |     |     |     |
| CP007676.1 |     |     |     |     |
| CP007672.1 |     |     |     |     |
| CP007674.1 |     |     |     |     |
| CP011526.1 |     |     |     |     |
| HF937103.1 |     |     |     |     |
| AP009351.1 |     |     |     |     |
| CP000046.1 |     |     |     |     |
| CP000253.1 |     |     |     |     |
| AC025591.8 |     |     |     |     |
| LT671859.1 |     |     |     |     |
| CP007499.1 |     |     |     |     |
| X17679.1   |     |     |     |     |
| CP007657.1 |     |     |     |     |
| CP014444.1 |     |     |     |     |
| CP014441.1 |     |     |     |     |
| CP014438.1 |     |     |     |     |
| CP014435.1 |     |     |     |     |
| CP014432.1 |     |     |     |     |
| CP014429.1 |     |     |     |     |
| CP014426.1 |     |     |     |     |
| CP014423.1 |     |     |     |     |
| CP014420.1 |     |     |     |     |
| CP014415.1 |     |     |     |     |
| CP014412.1 |     |     |     |     |
| CP014409.1 |     |     |     |     |
| CP014407.1 |     |     |     |     |
| CP014402.1 |     |     |     |     |
| CP014397.1 |     |     |     |     |
| CP014392.1 |     |     |     |     |
| CP014387.1 |     |     |     |     |
| CP014384.1 |     |     |     |     |
| CP014381.1 |     |     |     |     |
| CP014371.1 |     |     |     |     |
| CP014368.1 |     |     |     |     |
| CP014365.1 |     |     |     |     |
| CP014362.1 |     |     |     |     |
| CP014376.1 |     |     |     |     |
| CP009423.1 |     |     |     |     |
| CP016855.1 |     |     |     |     |
| CP013231.1 |     |     |     |     |
| CP010300.1 |     |     |     |     |
| CP010299.1 |     |     |     |     |
| CP010298.1 |     |     |     |     |
| CP010297.1 |     |     |     |     |
| CP010296.1 |     |     |     |     |
| CP010295.1 |     |     |     |     |
| CP007690.1 |     |     |     |     |
| CP007176.1 |     |     |     |     |
| CP000730.1 |     |     |     |     |
| CP000255.1 |     |     |     |     |
| CP007539.1 |     |     |     |     |
| CP007657.1 |     |     |     |     |
| AP014921.1 |     |     |     |     |
| AB436955.1 |     |     |     |     |
| AB489885.1 |     |     |     |     |
| AB489873.1 |     |     |     |     |
| AB489883.1 |     |     |     |     |
| AB489874.1 |     |     |     |     |
| LT615218.1 |     |     |     |     |
| AB436976.1 |     |     |     |     |
| AB489892.1 |     |     |     |     |
| AJ306908.1 |     |     |     |     |
| CP015646.1 |     |     |     |     |
| AB488510.1 |     |     |     |     |
| EU105387.1 |     |     |     |     |
| AB436975.1 |     |     |     |     |
| AB488499.1 |     |     |     |     |
| AJ309189.1 |     |     |     |     |
| FR821779.1 |     |     |     |     |
| CP012593.1 |     |     |     |     |
| CP012692.1 |     |     |     |     |
| CP013955.1 |     |     |     |     |
| CP013953.1 |     |     |     |     |
| CP014064.1 |     |     |     |     |
| LT009690.1 |     |     |     |     |
| AP017320.1 |     |     |     |     |
| CP010890.1 |     |     |     |     |
| CP001844.2 |     |     |     |     |
| CP001781.1 |     |     |     |     |
| AB488501.1 |     |     |     |     |
| AB489898.1 |     |     |     |     |
| HE579073.1 |     |     |     |     |
| HE579071.1 |     |     |     |     |
| HE579069.1 |     |     |     |     |
| HE579065.1 |     |     |     |     |
| HE579063.1 |     |     |     |     |

600

|            |        |            |     |
|------------|--------|------------|-----|
| CP007670.1 | -----G | ATAGGTTGTT | 358 |
| CP003033.1 | -----G | ATAGGTTGTT | 358 |
| CP018205.1 | -----G | ATAGGTTGTT | 358 |
| AP017377.1 | -----G | ATAGGTTGTT | 358 |
| LT598688.1 | -----G | ATAGGTTGTT | 358 |
| CP007676.1 | -----G | ATAGGTTGTT | 358 |
| CP007672.1 | -----G | ATAGGTTGTT | 358 |
| CP007674.1 | -----G | ATAGGTTGTT | 358 |
| CP011526.1 | -----G | ATAGGTTGTT | 358 |
| HF937103.1 | -----G | ATAGGTTGTT | 358 |
| AP009351.1 | -----G | ATAGGTTGTT | 358 |
| CP000046.1 | -----G | ATAGGTTGTT | 358 |
| CP000253.1 | -----G | ATAGGTTGTT | 358 |
| AC025591.8 | -----G | ATAGGTTGTT | 358 |
| LT671859.1 | -----G | ATAGGTTGTT | 358 |
| CP007499.1 | -----G | ATAGGTTGTT | 358 |
| X17679.1   | -----G | ATAGGTTGTT | 358 |
| CP007657.1 | -----G | ATAGGTTGTT | 358 |
| CP014444.1 | -----G | ATAGGTTGTT | 358 |
| CP014441.1 | -----G | ATAGGTTGTT | 358 |
| CP014438.1 | -----G | ATAGGTTGTT | 358 |
| CP014435.1 | -----G | ATAGGTTGTT | 358 |
| CP014432.1 | -----G | ATAGGTTGTT | 358 |
| CP014429.1 | -----G | ATAGGTTGTT | 358 |
| CP014426.1 | -----G | ATAGGTTGTT | 358 |
| CP014423.1 | -----G | ATAGGTTGTT | 358 |
| CP014420.1 | -----G | ATAGGTTGTT | 358 |
| CP014415.1 | -----G | ATAGGTTGTT | 358 |
| CP014412.1 | -----G | ATAGGTTGTT | 358 |
| CP014409.1 | -----G | ATAGGTTGTT | 358 |
| CP014407.1 | -----G | ATAGGTTGTT | 358 |
| CP014402.1 | -----G | ATAGGTTGTT | 358 |
| CP014397.1 | -----G | ATAGGTTGTT | 358 |
| CP014392.1 | -----G | ATAGGTTGTT | 358 |
| CP014387.1 | -----G | ATAGGTTGTT | 358 |
| CP014384.1 | -----G | ATAGGTTGTT | 358 |
| CP014381.1 | -----G | ATAGGTTGTT | 358 |
| CP014371.1 | -----G | ATAGGTTGTT | 358 |
| CP014368.1 | -----G | ATAGGTTGTT | 358 |
| CP014365.1 | -----G | ATAGGTTGTT | 358 |
| CP014362.1 | -----G | ATAGGTTGTT | 358 |
| CP014376.1 | -----G | ATAGGTTGTT | 358 |
| CP009423.1 | -----G | ATAGGTTGTT | 358 |
| CP016855.1 | -----G | ATAGGTTGTT | 358 |
| CP013231.1 | -----G | ATAGGTTGTT | 358 |
| CP010300.1 | -----G | ATAGGTTGTT | 358 |
| CP010299.1 | -----G | ATAGGTTGTT | 358 |
| CP010298.1 | -----G | ATAGGTTGTT | 358 |
| CP010297.1 | -----G | ATAGGTTGTT | 358 |
| CP010296.1 | -----G | ATAGGTTGTT | 358 |
| CP010295.1 | -----G | ATAGGTTGTT | 358 |
| CP007690.1 | -----G | ATAGGTTGTT | 358 |
| CP007176.1 | -----G | ATAGGTTGTT | 358 |
| CP000730.1 | -----G | ATAGGTTGTT | 358 |
| CP000255.1 | -----G | ATAGGTTGTT | 358 |
| CP007539.1 | -----G | ATAGGTTGTT | 358 |
| CP007657.1 | -----G | ATAGGTTGTT | 359 |
| AP014921.1 | -----G | ATAGGTTGTT | 358 |
| AB436955.1 | -----G | ATAGGTTGTT | 266 |
| AB489885.1 | -----G | ATAGGTTGTT | 266 |
| AB489873.1 | -----G | ATAGGTTGTT | 266 |
| AB489883.1 | -----G | ATAGGTTGTT | 266 |
| AB489874.1 | -----G | ATAGGTTGTT | 266 |
| LT615218.1 | -----G | ATAGGTTGTT | 358 |
| AB436976.1 | -----G | ATAGGTTGTT | 358 |
| AB489892.1 | -----G | ATAGGTTGTT | 266 |
| AJ306908.1 | -----G | ATAGGTTGTT | 358 |
| CP015646.1 | -----G | ATAGGTTGTT | 358 |
| AB488510.1 | -----G | ATAGGTTGTT | 266 |
| EU105387.1 | -----G | ATAGGTTGTT | 298 |
| AB436975.1 | -----G | ATAGGTTGTT | 358 |
| AB488499.1 | -----G | ATAGGTTGTT | 266 |
| AJ309189.1 | -----G | ATAGGTTGTT | 182 |
| FR821779.1 | -----G | ATAGATTGAT | 358 |
| CP012593.1 | -----  | -----      | --- |
| CP012692.1 | -----  | -----      | --- |
| CP013955.1 | -----  | -----      | --- |
| CP013953.1 | -----  | -----      | --- |
| CP014064.1 | -----  | -----      | --- |
| LT009690.1 | -----  | -----      | --- |
| AP017320.1 | -----  | -----      | --- |
| CP010890.1 | -----  | -----      | --- |
| CP001844.2 | -----  | -----      | --- |
| CP001781.1 | -----  | -----      | --- |
| AB488501.1 | -----  | -----      | --- |
| AB489898.1 | -----  | -----      | --- |
| HE579073.1 | -----  | -----      | --- |
| HE579071.1 | -----  | -----      | --- |
| HE579069.1 | -----  | -----      | --- |
| HE579065.1 | -----  | -----      | --- |
| HE579063.1 | -----  | -----      | --- |

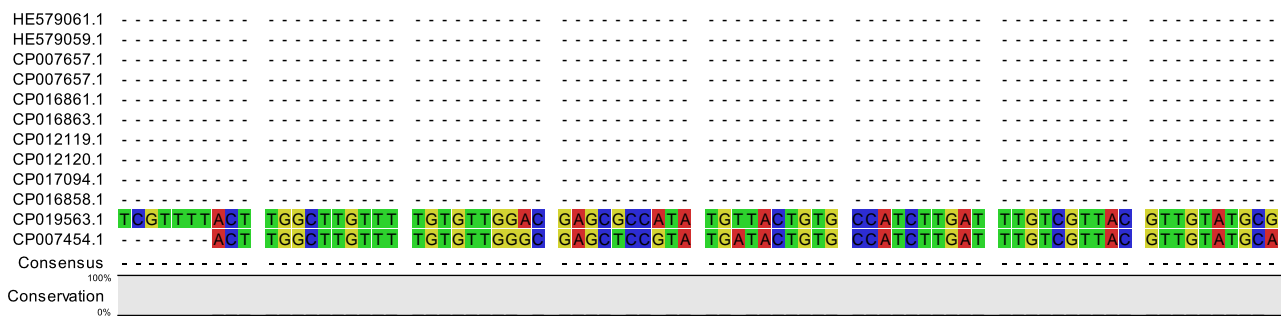

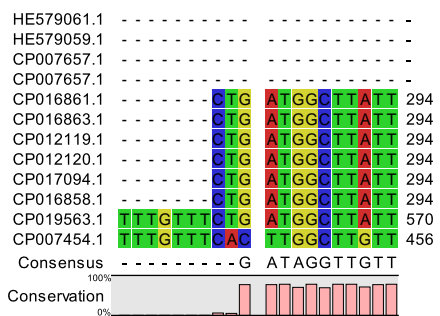





700

|            |                     |                     |     |
|------------|---------------------|---------------------|-----|
| CP007670.1 | A T T A T A A A A A | A G A A A A T C C T | 458 |
| CP003033.1 | A T T A T A A A A A | A G A A A A T C C T | 458 |
| CP018205.1 | A T T A T A A A A A | A G A A A A T C C T | 458 |
| AP017377.1 | A T T A T A A A A A | A G A A A A T C C T | 458 |
| LT598688.1 | A T T A T A A A A A | A G A A A A T C C T | 458 |
| CP007676.1 | A T T A T A A A A A | A G A A A A T C C T | 458 |
| CP007672.1 | A T T A T A A A A A | A G A A A A T C C T | 458 |
| CP007674.1 | A T T A T A A A A A | A G A A A A T C C T | 458 |
| CP011526.1 | A T T A T A A A A A | A G A A A A T C C T | 458 |
| HF937103.1 | A T T A T A A A A A | A G A A A A T C C T | 458 |
| AP009351.1 | A T T A T A A A A A | A G A A A A T C C T | 458 |
| CP000046.1 | A T T A T A A A A A | A G A A A A T C C T | 458 |
| CP000253.1 | A T T A T A A A A A | A G A A A A T C C T | 458 |
| AC025591.8 | A T T A T A A A A A | A G A A A A T C C T | 458 |
| LT671859.1 | A T T A T A A A A A | A G A A A A T C C T | 458 |
| CP007499.1 | A T T A T A A A A A | A G A A A A T C C T | 458 |
| X17679.1   | A T T A T A A A A A | A G A A A A T C C T | 458 |
| CP007657.1 | A T T A T A A A A A | A G A A A A T C C T | 458 |
| CP014444.1 | A T T A T A A A A A | A G A A A A T C C T | 458 |
| CP014441.1 | A T T A T A A A A A | A G A A A A T C C T | 458 |
| CP014438.1 | A T T A T A A A A A | A G A A A A T C C T | 458 |
| CP014435.1 | A T T A T A A A A A | A G A A A A T C C T | 458 |
| CP014432.1 | A T T A T A A A A A | A G A A A A T C C T | 458 |
| CP014429.1 | A T T A T A A A A A | A G A A A A T C C T | 458 |
| CP014426.1 | A T T A T A A A A A | A G A A A A T C C T | 458 |
| CP014423.1 | A T T A T A A A A A | A G A A A A T C C T | 458 |
| CP014420.1 | A T T A T A A A A A | A G A A A A T C C T | 458 |
| CP014415.1 | A T T A T A A A A A | A G A A A A T C C T | 458 |
| CP014412.1 | A T T A T A A A A A | A G A A A A T C C T | 458 |
| CP014409.1 | A T T A T A A A A A | A G A A A A T C C T | 458 |
| CP014407.1 | A T T A T A A A A A | A G A A A A T C C T | 458 |
| CP014402.1 | A T T A T A A A A A | A G A A A A T C C T | 458 |
| CP014397.1 | A T T A T A A A A A | A G A A A A T C C T | 458 |
| CP014392.1 | A T T A T A A A A A | A G A A A A T C C T | 458 |
| CP014387.1 | A T T A T A A A A A | A G A A A A T C C T | 458 |
| CP014384.1 | A T T A T A A A A A | A G A A A A T C C T | 458 |
| CP014381.1 | A T T A T A A A A A | A G A A A A T C C T | 458 |
| CP014371.1 | A T T A T A A A A A | A G A A A A T C C T | 458 |
| CP014368.1 | A T T A T A A A A A | A G A A A A T C C T | 458 |
| CP014365.1 | A T T A T A A A A A | A G A A A A T C C T | 458 |
| CP014362.1 | A T T A T A A A A A | A G A A A A T C C T | 458 |
| CP014376.1 | A T T A T A A A A A | A G A A A A T C C T | 458 |
| CP009423.1 | A T T A T A A A A A | A G A A A A T C C T | 458 |
| CP016855.1 | A T T A T A A A A A | A G A A A A T C C T | 458 |
| CP013231.1 | A T T A T A A A A A | A G A A A A T C C T | 458 |
| CP010300.1 | A T T A T A A A A A | A G A A A A T C C T | 458 |
| CP010299.1 | A T T A T A A A A A | A G A A A A T C C T | 458 |
| CP010298.1 | A T T A T A A A A A | A G A A A A T C C T | 458 |
| CP010297.1 | A T T A T A A A A A | A G A A A A T C C T | 458 |
| CP010296.1 | A T T A T A A A A A | A G A A A A T C C T | 458 |
| CP010295.1 | A T T A T A A A A A | A G A A A A T C C T | 458 |
| CP007690.1 | A T T A T A A A A A | A G A A A A T C C T | 458 |
| CP007176.1 | A T T A T A A A A A | A G A A A A T C C T | 458 |
| CP000730.1 | A T T A T A A A A A | A G A A A A T C C T | 458 |
| CP000255.1 | A T T A T A A A A A | A G A A A A T C C T | 458 |
| CP007539.1 | A T T A T A A A A A | A G A A A A T C C T | 458 |
| CP007657.1 | A T T A T A A A A A | A G A A A A T C C T | 459 |
| AP014921.1 | A T T A T A A A A A | A G A A A A T C C T | 458 |
| AB436955.1 | A T T A T A A A A A | A G A A A A T C C T | 366 |
| AB489885.1 | A T T A T A A A A A | A G A A A A T C C T | 366 |
| AB489873.1 | A T T A T A A A A A | A G A A A A T C C T | 366 |
| AB489883.1 | A T T A T A A A A A | A G A A A A T C C T | 366 |
| AB489874.1 | A T T A T A A A A A | A G A A A A T C C T | 366 |
| LT615218.1 | A T T A T A A A A A | A G A A A A T C C T | 458 |
| AB436976.1 | A T T A T A A A A A | A G A A A A T C C T | 458 |
| AB489892.1 | A T T A T A A A A A | A G A A A A T C C T | 366 |
| AJ306908.1 | A T T A T A A A A A | A G A A A A T C C T | 458 |
| CP015646.1 | A T T A T A A A A A | A G A A A A T C C T | 458 |
| AB488510.1 | A T T A T A A A A A | A G A A A A T C C T | 366 |
| EU105387.1 | A T T A T A A A A A | A G A A A A T C C T | 398 |
| AB436975.1 | A T T A T A A A A A | A G A A A A T C C T | 458 |
| AB488499.1 | A T T A T A A A A A | A G A A A A T C C T | 366 |
| AJ309189.1 | A T T A T A A A A A | A G A A A A T C C T | 282 |
| FR821779.1 | G T T - C A A A T A | A G A A C A C T - - | 455 |
| CP012593.1 | - - - - -           | - - - - -           | -   |
| CP012692.1 | - - - - -           | - - - - -           | -   |
| CP013955.1 | - - - - -           | - - - - -           | -   |
| CP013953.1 | - - - - -           | - - - - -           | -   |
| CP014064.1 | - - - - -           | - - - - -           | -   |
| LT009690.1 | - - - - -           | - - - - -           | -   |
| AP017320.1 | - - - - -           | - - - - -           | -   |
| CP010890.1 | - - - - -           | - - - - -           | -   |
| CP001844.2 | - - - - -           | - - - - -           | -   |
| CP001781.1 | - - - - -           | - - - - -           | -   |
| AB488501.1 | - - - - -           | - - - - -           | -   |
| AB489898.1 | - - - - -           | - - - - -           | -   |
| HE579073.1 | - - - - -           | - - - - -           | -   |
| HE579071.1 | - - - - -           | - - - - -           | -   |
| HE579069.1 | - - - - -           | - - - - -           | -   |
| HE579065.1 | - - - - -           | - - - - -           | -   |
| HE579063.1 | - - - - -           | - - - - -           | -   |

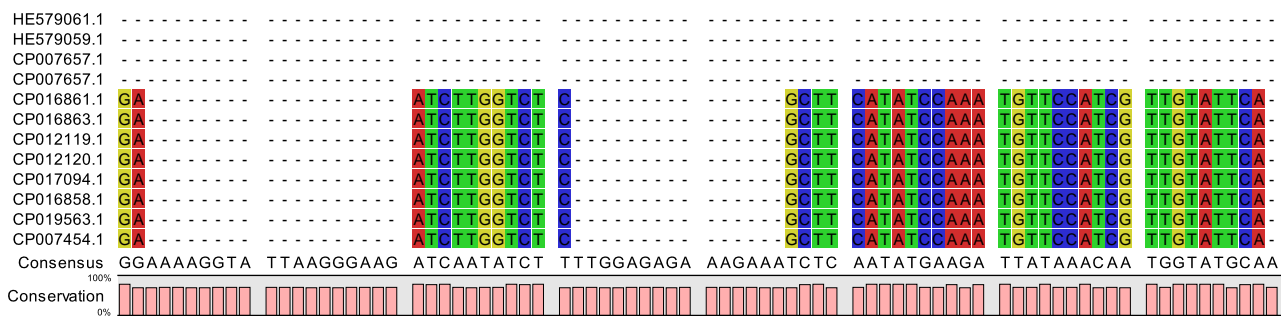

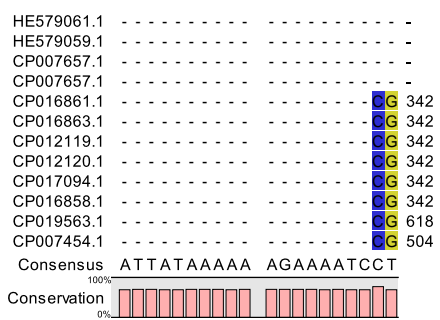



|            |            |            |     |
|------------|------------|------------|-----|
| CP007670.1 | TGCATTAAAG | AGAGCACTGG | 558 |
| CP003033.1 | TGCATTAAAG | AGAGCACTGG | 558 |
| CP018205.1 | TGCATTAAAG | AGAGCACTGG | 558 |
| AP017377.1 | TGCATTAAAG | AGAGCACTGG | 558 |
| LT598688.1 | TGCATTAAAG | AGAGCACTGG | 558 |
| CP007676.1 | TGCATTAAAG | AGAGCACTGG | 558 |
| CP007672.1 | TGCATTAAAG | AGAGCACTGG | 558 |
| CP007674.1 | TGCATTAAAG | AGAGCACTGG | 558 |
| CP011526.1 | TGCATTAAAG | AGAGCACTGG | 558 |
| HF937103.1 | TGCATTAAAG | AGAGCACTGG | 558 |
| AP009351.1 | TGCATTAAAG | AGAGCACTGG | 558 |
| CP000046.1 | TGCATTAAAG | AGAGCACTGG | 558 |
| CP000253.1 | TGCATTAAAG | AGAGCACTGG | 558 |
| AC025591.8 | TGCATTAAAG | AGAGCACTGG | 558 |
| LT671859.1 | TGCATTAAAG | AGAGCACTGG | 558 |
| CP007499.1 | TGCATTAAAG | AGAGCACTGG | 558 |
| X17679.1   | TGCATTAAAG | AGAGCACTGG | 558 |
| CP007657.1 | TGCATTAAAG | AGAGCACTGG | 558 |
| CP014444.1 | TGCATTAAAG | AGAGCACTGG | 558 |
| CP014441.1 | TGCATTAAAG | AGAGCACTGG | 558 |
| CP014438.1 | TGCATTAAAG | AGAGCACTGG | 558 |
| CP014435.1 | TGCATTAAAG | AGAGCACTGG | 558 |
| CP014432.1 | TGCATTAAAG | AGAGCACTGG | 558 |
| CP014429.1 | TGCATTAAAG | AGAGCACTGG | 558 |
| CP014426.1 | TGCATTAAAG | AGAGCACTGG | 558 |
| CP014423.1 | TGCATTAAAG | AGAGCACTGG | 558 |
| CP014420.1 | TGCATTAAAG | AGAGCACTGG | 558 |
| CP014415.1 | TGCATTAAAG | AGAGCACTGG | 558 |
| CP014412.1 | TGCATTAAAG | AGAGCACTGG | 558 |
| CP014409.1 | TGCATTAAAG | AGAGCACTGG | 558 |
| CP014407.1 | TGCATTAAAG | AGAGCACTGG | 558 |
| CP014402.1 | TGCATTAAAG | AGAGCACTGG | 558 |
| CP014397.1 | TGCATTAAAG | AGAGCACTGG | 558 |
| CP014392.1 | TGCATTAAAG | AGAGCACTGG | 558 |
| CP014387.1 | TGCATTAAAG | AGAGCACTGG | 558 |
| CP014384.1 | TGCATTAAAG | AGAGCACTGG | 558 |
| CP014381.1 | TGCATTAAAG | AGAGCACTGG | 558 |
| CP014371.1 | TGCATTAAAG | AGAGCACTGG | 558 |
| CP014368.1 | TGCATTAAAG | AGAGCACTGG | 558 |
| CP014365.1 | TGCATTAAAG | AGAGCACTGG | 558 |
| CP014362.1 | TGCATTAAAG | AGAGCACTGG | 558 |
| CP014376.1 | TGCATTAAAG | AGAGCACTGG | 558 |
| CP009423.1 | TGCATTAAAG | AGAGCACTGG | 558 |
| CP016855.1 | TGCATTAAAG | AGAGCACTGG | 558 |
| CP013231.1 | TGCATTAAAG | AGAGCACTGG | 558 |
| CP010300.1 | TGCATTAAAG | AGAGCACTGG | 558 |
| CP010299.1 | TGCATTAAAG | AGAGCACTGG | 558 |
| CP010298.1 | TGCATTAAAG | AGAGCACTGG | 558 |
| CP010297.1 | TGCATTAAAG | AGAGCACTGG | 558 |
| CP010296.1 | TGCATTAAAG | AGAGCACTGG | 558 |
| CP010295.1 | TGCATTAAAG | AGAGCACTGG | 558 |
| CP007690.1 | TGCATTAAAG | AGAGCACTGG | 558 |
| CP007176.1 | TGCATTAAAG | AGAGCACTGG | 558 |
| CP000730.1 | TGCATTAAAG | AGAGCACTGG | 558 |
| CP000255.1 | TGCATTAAAG | AGAGCACTGG | 558 |
| CP007539.1 | TGCATTAAAG | AGAGCACTGG | 558 |
| CP007657.1 | TGCATTAAAG | AGAGCACTGG | 559 |
| AP014921.1 | TGCATTAAAG | AGAGCACTGG | 558 |
| AB436955.1 | TGCATTAAAG | AGAGCACTGG | 466 |
| AB489885.1 | TGCATTAAAG | AGAGCACTGG | 466 |
| AB489873.1 | TGCATTAAAG | AGAGCACTGG | 466 |
| AB489883.1 | TGCATTAAAG | AGAGCACTGG | 466 |
| AB489874.1 | TGCATTAAAG | AGAGCACTGG | 466 |
| LT615218.1 | TGCATTAAAG | AGAGCACTGG | 558 |
| AB436976.1 | TGCATTAAAG | AGAGCACTGG | 558 |
| AB489892.1 | TGCATTAAAG | AGAGCACTGG | 466 |
| AJ306908.1 | TGCATTAAAG | AGAGCACTGG | 558 |
| CP015646.1 | TGCATTAAAG | AGAGCACTGG | 558 |
| AB488510.1 | TGCATTAAAG | AGAGCACTGG | 466 |
| EU105387.1 | TGCATTAAAG | AGAGCACTGG | 498 |
| AB436975.1 | TGCATTAAAG | GGAGCACTGG | 558 |
| AB488499.1 | TGCATTAAAG | GGAGCACTGG | 466 |
| AJ309189.1 | TGCATTAAAG | AGAGCACTGG | 382 |
| FR821779.1 | CTCTTTGAAA | GATGCAGTTT | 543 |
| CP012593.1 | -----      | -----      | -   |
| CP012692.1 | -----      | -----      | -   |
| CP013955.1 | -----      | -----      | -   |
| CP013953.1 | -----      | -----      | -   |
| CP014064.1 | -----      | -----      | -   |
| LT009690.1 | -----      | -----      | -   |
| AP017320.1 | -----      | -----      | -   |
| CP010890.1 | -----      | -----      | -   |
| CP001844.2 | -----      | -----      | -   |
| CP001781.1 | -----      | -----      | -   |
| AB488501.1 | -----      | -----      | -   |
| AB489898.1 | -----      | -----      | -   |
| HE579073.1 | -----      | -----      | -   |
| HE579071.1 | -----      | -----      | -   |
| HE579069.1 | -----      | -----      | -   |
| HE579065.1 | -----      | -----      | -   |
| HE579063.1 | -----      | -----      | -   |

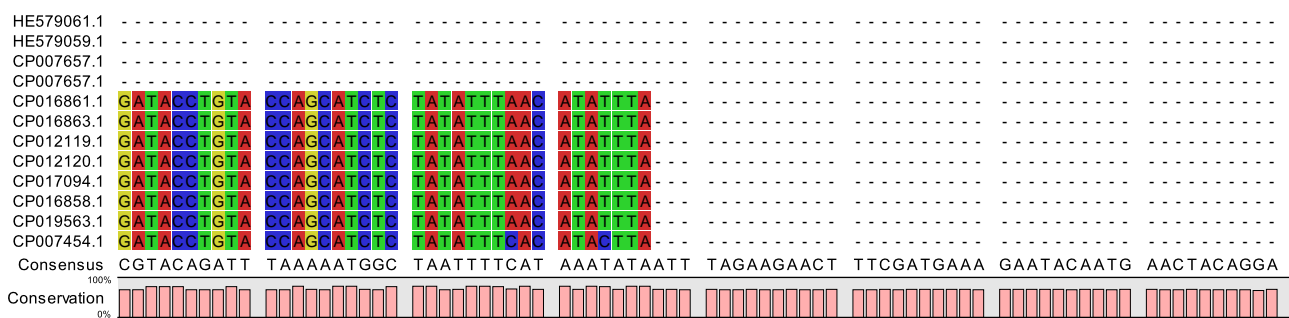

HE579061.1 - - - - -  
 HE579059.1 - - - - -  
 CP007657.1 - - - - -  
 CP007657.1 - - - - -  
 CP016861.1 - - - - - 379  
 CP016863.1 - - - - - 379  
 CP012119.1 - - - - - 379  
 CP012120.1 - - - - - 379  
 CP017094.1 - - - - - 379  
 CP016858.1 - - - - - 379  
 CP019563.1 - - - - - 655  
 CP007454.1 - - - - - 541

Consensus TGCATTAAAG AGAGCACTGG

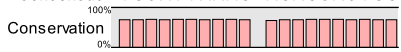







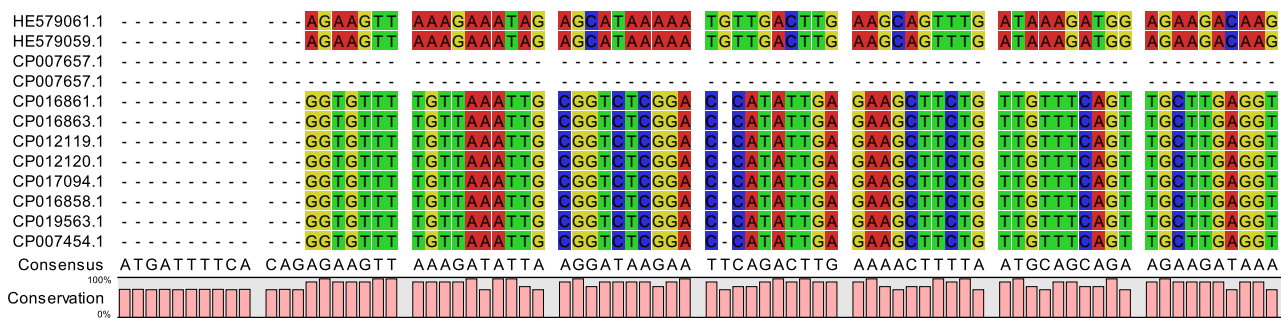

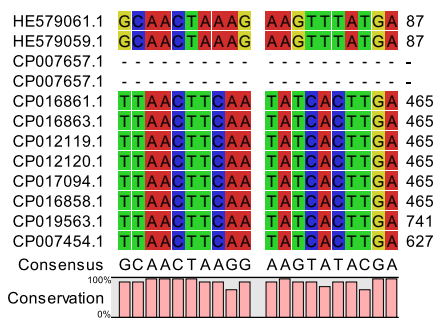





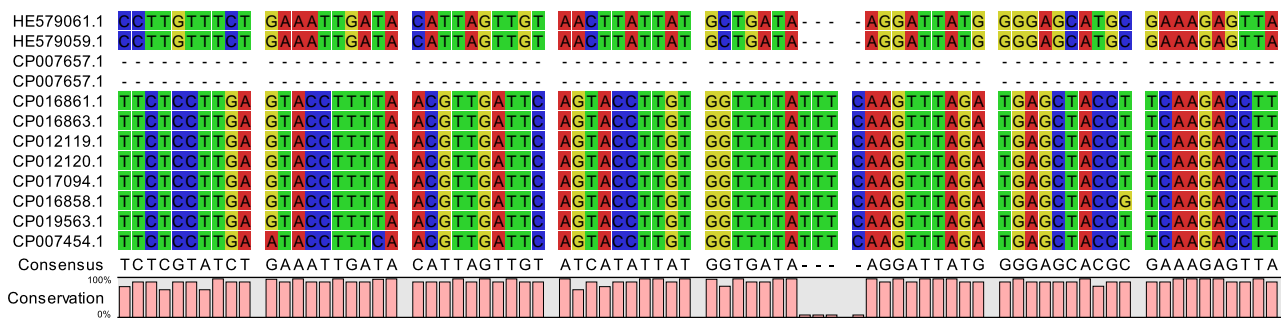

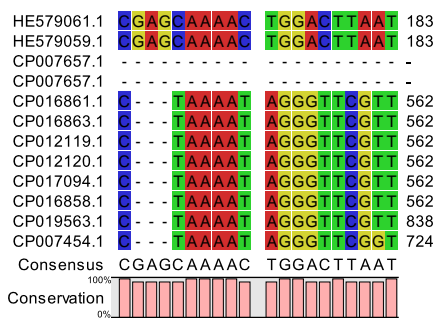





|            | 1,100 |   |   |   |   |   |   |   |   |   |   |   |   |   |   |     |
|------------|-------|---|---|---|---|---|---|---|---|---|---|---|---|---|---|-----|
| CP007670.1 | A     | A | T | T | A | T | G | A | T | T | C | T | T | T | A | 849 |
| CP003033.1 | A     | A | T | T | A | T | G | A | T | T | C | T | T | T | A | 849 |
| CP018205.1 | A     | A | T | T | A | T | G | A | T | T | C | T | T | T | A | 849 |
| AP017377.1 | A     | A | T | T | A | T | G | A | T | T | C | T | T | T | A | 849 |
| LT598688.1 | A     | A | T | T | A | T | G | A | T | T | C | T | T | T | A | 849 |
| CP007676.1 | A     | A | T | T | A | T | G | A | T | T | C | T | T | T | A | 849 |
| CP007672.1 | A     | A | T | T | A | T | G | A | T | T | C | T | T | T | A | 849 |
| CP007674.1 | A     | A | T | T | A | T | G | A | T | T | C | T | T | T | A | 849 |
| CP011526.1 | A     | A | T | T | A | T | G | A | T | T | C | T | T | T | A | 849 |
| HF937103.1 | A     | A | T | T | A | T | G | A | T | T | C | T | T | T | A | 849 |
| AP009351.1 | A     | A | T | T | A | T | G | A | T | T | C | T | T | T | A | 849 |
| CP000046.1 | A     | A | T | T | A | T | G | A | T | T | C | T | T | T | A | 849 |
| CP000253.1 | A     | A | T | T | A | T | G | A | T | T | C | T | T | T | A | 849 |
| AC025591.8 | A     | A | T | T | A | T | G | A | T | T | C | T | T | T | A | 849 |
| LT671859.1 | A     | A | T | T | A | T | G | A | T | T | C | T | T | T | A | 849 |
| CP007499.1 | A     | A | T | T | A | T | G | A | T | T | C | T | T | T | A | 849 |
| X17679.1   | A     | A | T | T | A | T | G | A | T | T | C | T | T | T | A | 849 |
| CP007657.1 | A     | A | T | T | A | T | G | A | T | T | C | T | T | T | A | 849 |
| CP014444.1 | A     | A | T | T | A | T | G | A | T | T | C | T | T | T | A | 849 |
| CP014441.1 | A     | A | T | T | A | T | G | A | T | T | C | T | T | T | A | 849 |
| CP014438.1 | A     | A | T | T | A | T | G | A | T | T | C | T | T | T | A | 849 |
| CP014435.1 | A     | A | T | T | A | T | G | A | T | T | C | T | T | T | A | 849 |
| CP014432.1 | A     | A | T | T | A | T | G | A | T | T | C | T | T | T | A | 849 |
| CP014429.1 | A     | A | T | T | A | T | G | A | T | T | C | T | T | T | A | 849 |
| CP014426.1 | A     | A | T | T | A | T | G | A | T | T | C | T | T | T | A | 849 |
| CP014423.1 | A     | A | T | T | A | T | G | A | T | T | C | T | T | T | A | 849 |
| CP014420.1 | A     | A | T | T | A | T | G | A | T | T | C | T | T | T | A | 849 |
| CP014415.1 | A     | A | T | T | A | T | G | A | T | T | C | T | T | T | A | 849 |
| CP014412.1 | A     | A | T | T | A | T | G | A | T | T | C | T | T | T | A | 849 |
| CP014409.1 | A     | A | T | T | A | T | G | A | T | T | C | T | T | T | A | 849 |
| CP014407.1 | A     | A | T | T | A | T | G | A | T | T | C | T | T | T | A | 849 |
| CP014402.1 | A     | A | T | T | A | T | G | A | T | T | C | T | T | T | A | 849 |
| CP014397.1 | A     | A | T | T | A | T | G | A | T | T | C | T | T | T | A | 849 |
| CP014392.1 | A     | A | T | T | A | T | G | A | T | T | C | T | T | T | A | 849 |
| CP014387.1 | A     | A | T | T | A | T | G | A | T | T | C | T | T | T | A | 849 |
| CP014384.1 | A     | A | T | T | A | T | G | A | T | T | C | T | T | T | A | 849 |
| CP014381.1 | A     | A | T | T | A | T | G | A | T | T | C | T | T | T | A | 849 |
| CP014371.1 | A     | A | T | T | A | T | G | A | T | T | C | T | T | T | A | 849 |
| CP014368.1 | A     | A | T | T | A | T | G | A | T | T | C | T | T | T | A | 849 |
| CP014365.1 | A     | A | T | T | A | T | G | A | T | T | C | T | T | T | A | 849 |
| CP014362.1 | A     | A | T | T | A | T | G | A | T | T | C | T | T | T | A | 849 |
| CP014376.1 | A     | A | T | T | A | T | G | A | T | T | C | T | T | T | A | 849 |
| CP009423.1 | A     | A | T | T | A | T | G | A | T | T | C | T | T | T | A | 849 |
| CP016855.1 | A     | A | T | T | A | T | G | A | T | T | C | T | T | T | A | 849 |
| CP013231.1 | A     | A | T | T | A | T | G | A | T | T | C | T | T | T | A | 849 |
| CP010300.1 | A     | A | T | T | A | T | G | A | T | T | C | T | T | T | A | 849 |
| CP010299.1 | A     | A | T | T | A | T | G | A | T | T | C | T | T | T | A | 849 |
| CP010298.1 | A     | A | T | T | A | T | G | A | T | T | C | T | T | T | A | 849 |
| CP010297.1 | A     | A | T | T | A | T | G | A | T | T | C | T | T | T | A | 849 |
| CP010296.1 | A     | A | T | T | A | T | G | A | T | T | C | T | T | T | A | 849 |
| CP010295.1 | A     | A | T | T | A | T | G | A | T | T | C | T | T | T | A | 849 |
| CP007690.1 | A     | A | T | T | A | T | G | A | T | T | C | T | T | T | A | 849 |
| CP007176.1 | A     | A | T | T | A | T | G | A | T | T | C | T | T | T | A | 849 |
| CP000730.1 | A     | A | T | T | A | T | G | A | T | T | C | T | T | T | A | 849 |
| CP000255.1 | A     | A | T | T | A | T | G | A | T | T | C | T | T | T | A | 849 |
| CP007539.1 | A     | A | T | T | A | T | G | A | T | T | C | T | T | T | A | 849 |
| CP007657.1 | A     | A | T | T | A | T | G | A | T | T | C | T | T | T | A | 849 |
| AP014921.1 | A     | A | T | T | A | T | G | A | T | T | C | T | T | T | A | 849 |
| AB436955.1 | A     | A | T | T | A | T | G | A | T | T | C | T | T | T | A | 757 |
| AB489885.1 | A     | A | T | T | A | T | G | A | T | T | C | T | T | T | A | 757 |
| AB489873.1 | A     | A | T | T | A | T | G | A | T | T | C | T | T | T | A | 757 |
| AB489883.1 | A     | A | T | T | A | T | G | A | T | T | C | T | T | T | A | 757 |
| AB489874.1 | A     | A | T | T | A | T | G | A | T | T | C | T | T | T | A | 757 |
| LT615218.1 | A     | A | T | T | A | T | G | A | T | T | C | T | T | T | A | 849 |
| AB436976.1 | A     | A | T | T | A | T | G | A | T | T | C | T | T | T | A | 849 |
| AB489892.1 | A     | A | T | T | A | T | G | A | T | T | C | T | T | T | A | 757 |
| AJ306908.1 | A     | A | T | T | A | T | G | A | T | T | C | T | T | T | A | 849 |
| CP015646.1 | A     | A | T | T | A | T | G | A | T | T | C | T | T | T | A | 849 |
| AB488510.1 | A     | A | T | T | A | T | G | A | T | T | C | T | T | T | A | 757 |
| EU105387.1 | A     | A | T | T | A | T | G | A | T | T | C | T | T | T | A | 789 |
| AB436975.1 | A     | A | T | T | A | T | G | A | T | T | C | T | T | T | A | 849 |
| AB488499.1 | A     | A | T | T | A | T | G | A | T | T | C | T | T | T | A | 757 |
| AJ309189.1 | A     | A | T | T | A | T | G | A | T | T | C | T | T | T | A | 673 |
| FR821779.1 | A     | A | T | T | A | T | G | A | T | T | C | T | T | T | A | 834 |
| CP012593.1 | A     | A | T | T | A | T | A | G | A | T | T | C | T | T | A | 278 |
| CP012692.1 | A     | A | T | T | A | T | A | G | A | T | T | C | T | T | A | 278 |
| CP013955.1 | A     | A | T | T | A | T | A | G | A | T | T | C | T | T | A | 278 |
| CP013953.1 | A     | A | T | T | A | T | A | G | A | T | T | C | T | T | A | 278 |
| CP014064.1 | A     | A | T | T | A | T | A | G | A | T | T | C | T | T | A | 278 |
| LT009690.1 | A     | A | T | T | A | T | A | G | A | T | T | C | T | T | A | 278 |
| AP017320.1 | A     | A | T | T | A | T | A | G | A | T | T | C | T | T | A | 278 |
| CP010890.1 | A     | A | T | T | A | T | A | G | A | T | T | C | T | T | A | 278 |
| CP001844.2 | A     | A | T | T | A | T | A | G | A | T | T | C | T | T | A | 278 |
| CP001781.1 | A     | A | T | T | A | T | A | G | A | T | T | C | T | T | A | 278 |
| AB488501.1 | A     | A | T | T | A | T | A | G | A | T | T | C | T | T | A | 278 |
| AB489898.1 | A     | A | T | T | A | T | A | G | A | T | T | C | T | T | A | 278 |
| HE579073.1 | A     | A | T | T | A | T | A | G | A | T | T | C | T | T | A | 278 |
| HE579071.1 | A     | A | T | T | A | T | A | G | A | T | T | C | T | T | A | 278 |
| HE579069.1 | A     | A | T | T | A | T | A | G | A | T | T | C | T | T | A | 278 |
| HE579065.1 | A     | A | T | T | A | T | A | G | A | T | T | C | T | T | A | 278 |
| HE579063.1 | A     | A | T | T | A | T | A | G | A | T | T | C | T | T | A | 278 |

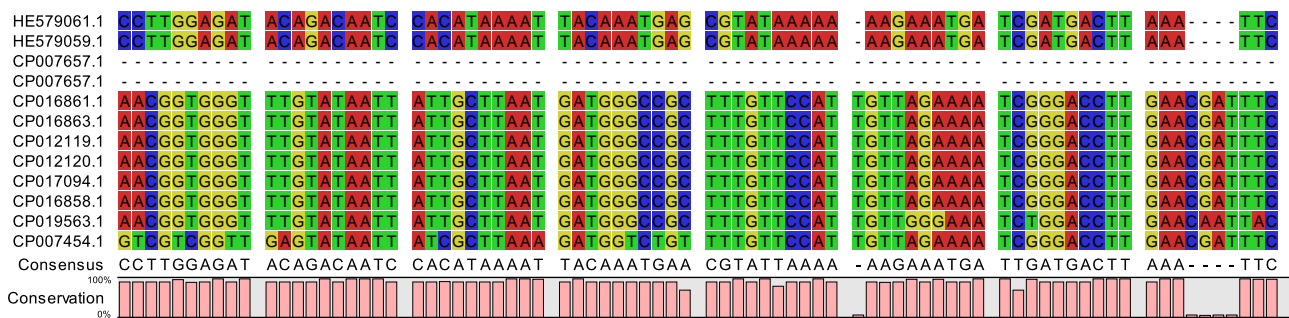

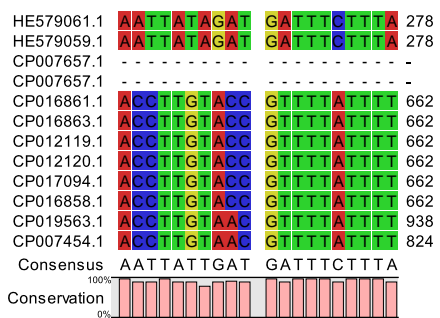





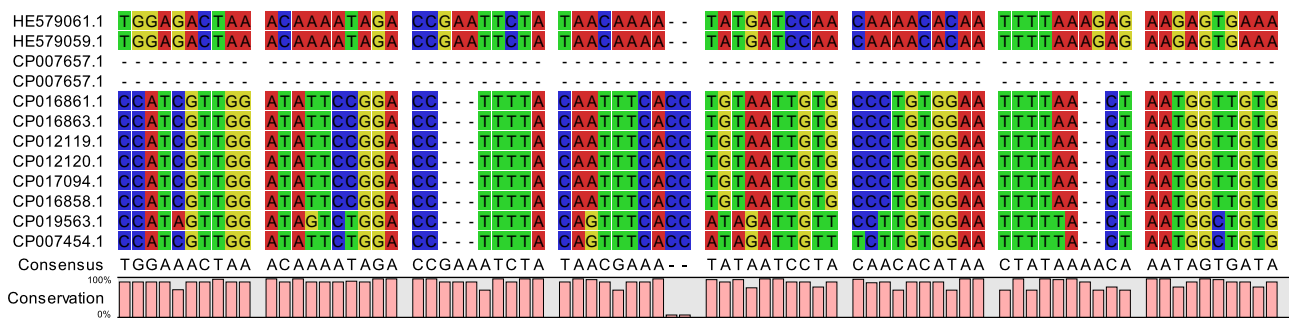

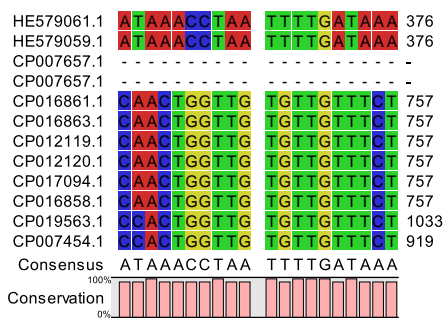







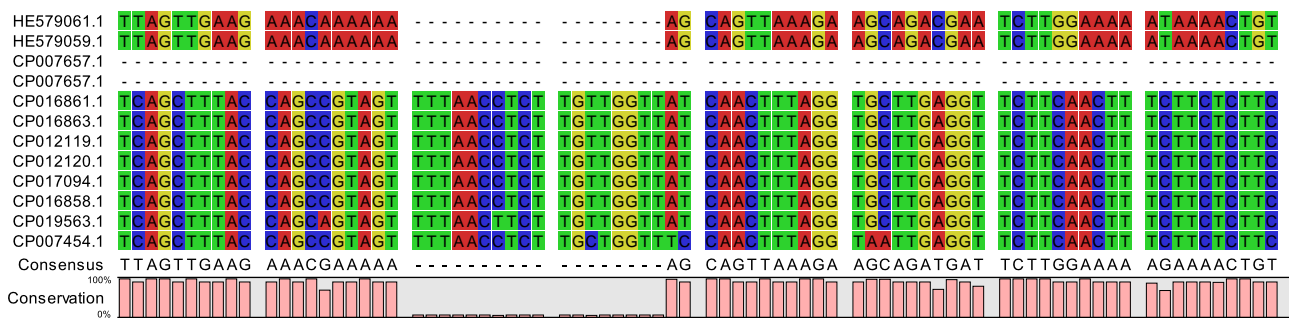

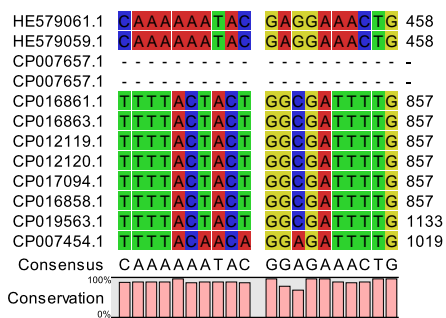





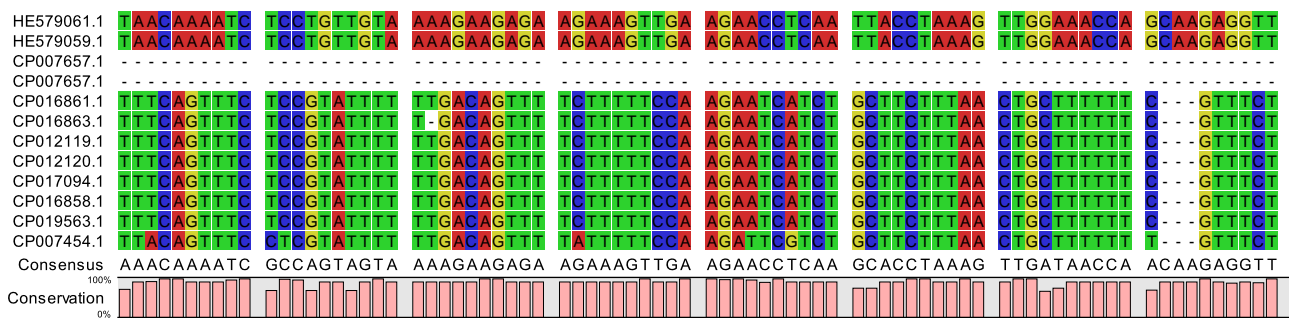

HE579061.1 AAAAC TACGG CTGGT AAAGC 558  
 HE579059.1 AAAAC TACGG CTGGT AAAGC 558  
 CP007657.1 - - - - -  
 CP007657.1 - - - - -  
 CP016861.1 TCAACTAATT TATCAAAATT 954  
 CP016863.1 TCAACTAATT TATCAAAATT 953  
 CP012119.1 TCAACTAATT TATCAAAATT 954  
 CP012120.1 TCAACTAATT TATCAAAATT 954  
 CP017094.1 TCAACTAATT TATCAAAATT 954  
 CP016858.1 TCAACTAATT TATCAAAATT 954  
 CP019563.1 TCAACTAATT TATCAAAATT 1230  
 CP007454.1 TCAACTAATT TATCAAAATT 1116

Consensus AAAACTACGG CTGGTAAAGC

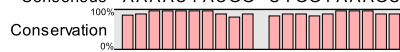





1,500

|            |       |       |             |      |
|------------|-------|-------|-------------|------|
| CP007670.1 | GGTCC | ----- | GGAAATATCCA | 1220 |
| CP003033.1 | GGTCC | ----- | GGAAATATCCA | 1220 |
| CP018205.1 | GGTCC | ----- | GGAAATATCCA | 1220 |
| AP017377.1 | GGTCC | ----- | GGAAATATCCA | 1220 |
| LT598688.1 | GGTCC | ----- | GGAAATATCCA | 1220 |
| CP007676.1 | GGTCC | ----- | GGAAATATCCA | 1220 |
| CP007672.1 | GGTCC | ----- | GGAAATATCCA | 1220 |
| CP007674.1 | GGTCC | ----- | GGAAATATCCA | 1220 |
| CP011526.1 | GGTCC | ----- | GGAAATATCCA | 1220 |
| HF937103.1 | GGTCC | ----- | GGAAATATCCA | 1220 |
| AP009351.1 | GGTCC | ----- | GGAAATATCCA | 1220 |
| CP000046.1 | GGTCC | ----- | GGAAATATCCA | 1220 |
| CP000253.1 | GGTCC | ----- | GGAAATATCCA | 1220 |
| AC025591.8 | GGTCC | ----- | GGAAATATCCA | 1220 |
| LT671859.1 | GGTCC | ----- | GGAAATATCCA | 1220 |
| CP007499.1 | GGTCC | ----- | GGAAATATCCA | 1220 |
| X17679.1   | GGTCC | ----- | GGAAATATCCA | 1220 |
| CP007657.1 | GGTCC | ----- | GGAAATATCCA | 1220 |
| CP014444.1 | GGTCC | ----- | GGAAATATCCA | 1220 |
| CP014441.1 | GGTCC | ----- | GGAAATATCCA | 1220 |
| CP014438.1 | GGTCC | ----- | GGAAATATCCA | 1220 |
| CP014435.1 | GGTCC | ----- | GGAAATATCCA | 1220 |
| CP014432.1 | GGTCC | ----- | GGAAATATCCA | 1220 |
| CP014429.1 | GGTCC | ----- | GGAAATATCCA | 1220 |
| CP014426.1 | GGTCC | ----- | GGAAATATCCA | 1220 |
| CP014423.1 | GGTCC | ----- | GGAAATATCCA | 1220 |
| CP014420.1 | GGTCC | ----- | GGAAATATCCA | 1220 |
| CP014415.1 | GGTCC | ----- | GGAAATATCCA | 1220 |
| CP014412.1 | GGTCC | ----- | GGAAATATCCA | 1220 |
| CP014409.1 | GGTCC | ----- | GGAAATATCCA | 1220 |
| CP014407.1 | GGTCC | ----- | GGAAATATCCA | 1220 |
| CP014402.1 | GGTCC | ----- | GGAAATATCCA | 1220 |
| CP014397.1 | GGTCC | ----- | GGAAATATCCA | 1220 |
| CP014392.1 | GGTCC | ----- | GGAAATATCCA | 1220 |
| CP014387.1 | GGTCC | ----- | GGAAATATCCA | 1220 |
| CP014384.1 | GGTCC | ----- | GGAAATATCCA | 1220 |
| CP014381.1 | GGTCC | ----- | GGAAATATCCA | 1220 |
| CP014371.1 | GGTCC | ----- | GGAAATATCCA | 1220 |
| CP014368.1 | GGTCC | ----- | GGAAATATCCA | 1220 |
| CP014365.1 | GGTCC | ----- | GGAAATATCCA | 1220 |
| CP014362.1 | GGTCC | ----- | GGAAATATCCA | 1220 |
| CP014376.1 | GGTCC | ----- | GGAAATATCCA | 1220 |
| CP009423.1 | GGTCC | ----- | GGAAATATCCA | 1220 |
| CP016855.1 | GGTCC | ----- | GGAAATATCCA | 1220 |
| CP013231.1 | GGTCC | ----- | GGAAATATCCA | 1220 |
| CP010300.1 | GGTCC | ----- | GGAAATATCCA | 1220 |
| CP010299.1 | GGTCC | ----- | GGAAATATCCA | 1220 |
| CP010298.1 | GGTCC | ----- | GGAAATATCCA | 1220 |
| CP010297.1 | GGTCC | ----- | GGAAATATCCA | 1220 |
| CP010296.1 | GGTCC | ----- | GGAAATATCCA | 1220 |
| CP010295.1 | GGTCC | ----- | GGAAATATCCA | 1220 |
| CP007690.1 | GGTCC | ----- | GGAAATATCCA | 1220 |
| CP007176.1 | GGTCC | ----- | GGAAATATCCA | 1220 |
| CP000730.1 | GGTCC | ----- | GGAAATATCCA | 1220 |
| CP000255.1 | GGTCC | ----- | GGAAATATCCA | 1220 |
| CP007539.1 | GGTCC | ----- | GGAAATATCCA | 1220 |
| CP007657.1 | GGTCC | ----- | GGAAATATCCA | 1220 |
| AP014921.1 | GGTCC | ----- | GGAAATATCCA | 1220 |
| AB436955.1 | GGTCC | ----- | GGAAATATCCA | 1128 |
| AB489885.1 | GGTCC | ----- | GGAAATATCCA | 1128 |
| AB489873.1 | GGTCC | ----- | GGAAATATCCA | 1128 |
| AB489883.1 | GGTCC | ----- | GGAAATATCCA | 1128 |
| AB489874.1 | GGTCC | ----- | GGAAATATCCA | 1116 |
| LT615218.1 | GGTCC | ----- | AGACTATCCA  | 1220 |
| AB436976.1 | GGTCC | ----- | AGACTATCCA  | 1220 |
| AB489892.1 | GGTCC | ----- | AGACTATCCA  | 1128 |
| AJ306908.1 | GGTCC | ----- | AGACTATCCA  | 1220 |
| CP015646.1 | GGTCC | ----- | AGACTATCCA  | 1220 |
| AB488510.1 | GGTCC | ----- | GGAAATATCCA | 1128 |
| EU105387.1 | GGTCC | ----- | GGAAATATCCA | 1160 |
| AB436975.1 | GGTCC | ----- | GGAATATCTA  | 1220 |
| AB488499.1 | GGTCC | ----- | GGAATATCTA  | 1128 |
| AJ309189.1 | GGTCC | ----- | GGAAATATCCA | 1044 |
| FR821779.1 | GGTCC | ----- | GGAATATCTA  | 1205 |
| CP012593.1 | GGTCC | ----- | AGAAATATCCA | 649  |
| CP012692.1 | GGTCC | ----- | AGAAATATCCA | 649  |
| CP013955.1 | GGTCC | ----- | AGAAATATCCA | 649  |
| CP013953.1 | GGTCC | ----- | AGAAATATCCA | 649  |
| CP014064.1 | GGTCC | ----- | AGAAATATCCA | 649  |
| LT009690.1 | GGTCC | ----- | AGAAATATCCA | 649  |
| AP017320.1 | GGTCC | ----- | AGAAATATCCA | 649  |
| CP010890.1 | GGTCC | ----- | AGAAATATCCA | 649  |
| CP001844.2 | GGTCC | ----- | AGAAATATCCA | 649  |
| CP001781.1 | GGTCC | ----- | AGAAATATCCA | 649  |
| AB488501.1 | GGTCC | ----- | AGAAATATCCA | 649  |
| AB489898.1 | GGTCC | ----- | AGAAATATCCA | 649  |
| HE579073.1 | GGTCC | ----- | AGAAATATCCA | 649  |
| HE579071.1 | GGTCC | ----- | AGAAATATCCA | 649  |
| HE579069.1 | GGTCC | ----- | AGAAATATCCA | 649  |
| HE579065.1 | GGTCC | ----- | AGAAATATCCA | 649  |
| HE579063.1 | GGTCC | ----- | AGAAATATCCA | 649  |

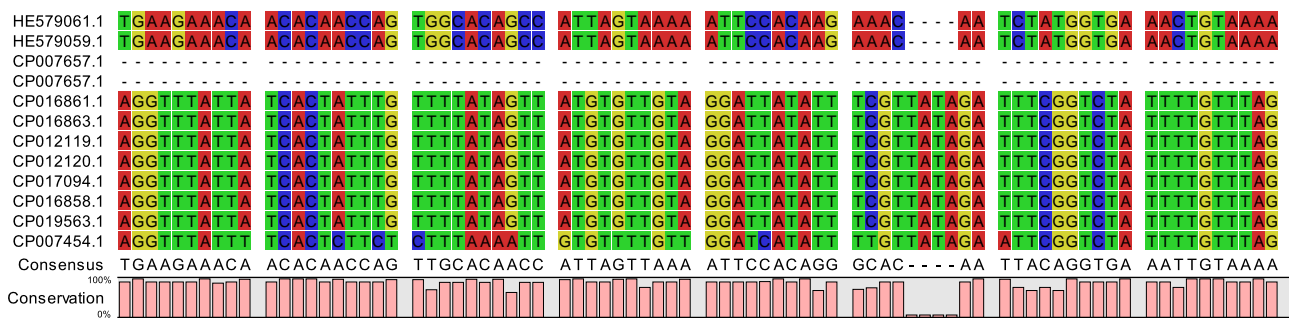

HE579061.1 GGTCC- - - - - AGAATATCCA 649  
 HE579059.1 GGTCC- - - - - AGAATATCCA 649  
 CP007657.1 - - - - - - - - - - - - -  
 CP007657.1 - - - - - - - - - - - - -  
 CP016861.1 TTTCCATAAA GAAATCATCA 1054  
 CP016863.1 TTTCCATAAA GAAATCATCA 1053  
 CP012119.1 TTTCCATAAA GAAATCATCA 1054  
 CP012120.1 TTTCCATAAA GAAATCATCA 1054  
 CP017094.1 TTTCCATAAA GAAATCATCA 1054  
 CP016858.1 TTTCCATAAA GAAATCATCA 1054  
 CP019563.1 TTTCCATAAA GAAATCATCA 1330  
 CP007454.1 TTTCCATAAA GAAATCATCA 1216

Consensus GGTCC- - - - - GGAATATCCA

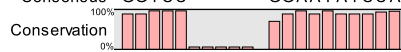



1,600

|            |                      |      |
|------------|----------------------|------|
| CP007670.1 | AAAGGGCCCATCATTAAGC  | 1304 |
| CP003033.1 | AAAGGGCCCATCATTAAGC  | 1304 |
| CP018205.1 | AAAGGGCCCATCATTAAGC  | 1304 |
| AP017377.1 | AAAGGGCCCATCATTAAGC  | 1304 |
| LT598688.1 | AAAGGGCCCATCATTAAGC  | 1304 |
| CP007676.1 | AAAGGGCCCATCATTAAGC  | 1304 |
| CP007672.1 | AAAGGGCCCATCATTAAGC  | 1304 |
| CP007674.1 | AAAGGGCCCATCATTAAGC  | 1304 |
| CP011526.1 | AAAGGGCCCATCATTAAGC  | 1304 |
| HF937103.1 | AAAGGGCCCATCATTAAGC  | 1304 |
| AP009351.1 | AAAGGGCCCATCATTAAGC  | 1304 |
| CP000046.1 | AAAGGGCCCATCATTAAGC  | 1304 |
| CP000253.1 | AAAGGGCCCATCATTAAGC  | 1304 |
| AC025591.8 | AAAGGGCCCATCATTAAGC  | 1304 |
| LT671859.1 | AAAGGGCCCATCATTAAGC  | 1304 |
| CP007499.1 | AAAGGGCCCATCATTAAGC  | 1304 |
| X17679.1   | AAAGGGCCCATCATTAAGC  | 1304 |
| CP007657.1 | AAAGGGCCCATCATTAAGC  | 1304 |
| CP014444.1 | AAAGGGCCCATCATTAAGC  | 1304 |
| CP014441.1 | AAAGGGCCCATCATTAAGC  | 1304 |
| CP014438.1 | AAAGGGCCCATCATTAAGC  | 1304 |
| CP014435.1 | AAAGGGCCCATCATTAAGC  | 1304 |
| CP014432.1 | AAAGGGCCCATCATTAAGC  | 1304 |
| CP014429.1 | AAAGGGCCCATCATTAAGC  | 1304 |
| CP014426.1 | AAAGGGCCCATCATTAAGC  | 1304 |
| CP014423.1 | AAAGGGCCCATCATTAAGC  | 1304 |
| CP014420.1 | AAAGGGCCCATCATTAAGC  | 1304 |
| CP014415.1 | AAAGGGCCCATCATTAAGC  | 1304 |
| CP014412.1 | AAAGGGCCCATCATTAAGC  | 1304 |
| CP014409.1 | AAAGGGCCCATCATTAAGC  | 1304 |
| CP014407.1 | AAAGGGCCCATCATTAAGC  | 1304 |
| CP014402.1 | AAAGGGCCCATCATTAAGC  | 1304 |
| CP014397.1 | AAAGGGCCCATCATTAAGC  | 1304 |
| CP014392.1 | AAAGGGCCCATCATTAAGC  | 1304 |
| CP014387.1 | AAAGGGCCCATCATTAAGC  | 1304 |
| CP014384.1 | AAAGGGCCCATCATTAAGC  | 1304 |
| CP014381.1 | AAAGGGCCCATCATTAAGC  | 1304 |
| CP014371.1 | AAAGGGCCCATCATTAAGC  | 1304 |
| CP014368.1 | AAAGGGCCCATCATTAAGC  | 1304 |
| CP014365.1 | AAAGGGCCCATCATTAAGC  | 1304 |
| CP014362.1 | AAAGGGCCCATCATTAAGC  | 1304 |
| CP014376.1 | AAAGGGCCCATCATTAAGC  | 1304 |
| CP009423.1 | AAAGGGCCCATCATTAAGC  | 1304 |
| CP016855.1 | AAAGGGCCCATCATTAAGC  | 1304 |
| CP013231.1 | AAAGGGCCCATCATTAAGC  | 1304 |
| CP010300.1 | AAAGGGCCCATCATTAAGC  | 1304 |
| CP010299.1 | AAAGGGCCCATCATTAAGC  | 1304 |
| CP010298.1 | AAAGGGCCCATCATTAAGC  | 1304 |
| CP010297.1 | AAAGGGCCCATCATTAAGC  | 1304 |
| CP010296.1 | AAAGGGCCCATCATTAAGC  | 1304 |
| CP010295.1 | AAAGGGCCCATCATTAAGC  | 1304 |
| CP007690.1 | AAAGGGCCCATCATTAAGC  | 1304 |
| CP007176.1 | AAAGGGCCCATCATTAAGC  | 1304 |
| CP000730.1 | AAAGGGCCCATCATTAAGC  | 1304 |
| CP000255.1 | AAAGGGCCCATCATTAAGC  | 1304 |
| CP007539.1 | AAAGGGCCCATCATTAAGC  | 1303 |
| CP007657.1 | AAAGGGCCCATCATTAAGC  | 1304 |
| AP014921.1 | AAAGGGCCCATCATTAAGC  | 1304 |
| AB436955.1 | AAAGGGCCCATCATTAAGC  | 1212 |
| AB489885.1 | AAAGGGCCCATCATTAAGC  | 1212 |
| AB489873.1 | AAAGGGCCCATCATTAAGC  | 1212 |
| AB489883.1 | AAAGGGCCCATCATTAAGC  | 1212 |
| AB489874.1 | AAAGGGCCCATCATTAAGC  | 1200 |
| LT615218.1 | AAAGGGCCCATCATTAAGC  | 1304 |
| AB436976.1 | AAAGGGCCCATCATTAAGC  | 1304 |
| AB489892.1 | AAAGGGCCCATCATTAAGC  | 1212 |
| AJ306908.1 | AAAAAGAGCCATCTTAAAGC | 1304 |
| CP015646.1 | AAAAAGAGCCATCTTAAAGC | 1304 |
| AB488510.1 | AAAGGGCCCATCATTAAGC  | 1212 |
| EU105387.1 | AAAGGGCCCATCATTAAGC  | 1244 |
| AB436975.1 | AAAAAGAGCCATCTTAAAGC | 1304 |
| AB488499.1 | AAAAAGAGCCATCTTAAAGC | 1212 |
| AJ309189.1 | AAAGGGCCCATCATTAAGC  | 1128 |
| FR821779.1 | AAAAAGAGCCATCTTAAAGC | 1289 |
| CP012593.1 | AAAAAGAGCCATCTTAAAGC | 733  |
| CP012692.1 | AAAAAGAGCCATCTTAAAGC | 733  |
| CP013955.1 | AAAAAGAGCCATCTTAAAGC | 733  |
| CP013953.1 | AAAAAGAGCCATCTTAAAGC | 733  |
| CP014064.1 | AAAAAGAGCCATCTTAAAGC | 733  |
| LT009690.1 | AAAAAGAGCCATCTTAAAGC | 733  |
| AP017320.1 | AAAAAGAGCCATCTTAAAGC | 733  |
| CP010890.1 | AAAAAGAGCCATCTTAAAGC | 733  |
| CP001844.2 | AAAAAGAGCCATCTTAAAGC | 733  |
| CP001781.1 | AAAAAGAGCCATCTTAAAGC | 733  |
| AB488501.1 | AAAAAGAGCCATCTTAAAGC | 733  |
| AB489898.1 | AAAAAGAGCCATCTTAAAGC | 733  |
| HE579073.1 | AAAAAGAGCCATCTTAAAGC | 733  |
| HE579071.1 | AAAAAGAGCCATCTTAAAGC | 733  |
| HE579069.1 | AAAAAGAGCCATCTTAAAGC | 733  |
| HE579065.1 | AAAAAGAGCCATCTTAAAGC | 733  |
| HE579063.1 | AAAAAGAGCCATCTTAAAGC | 733  |

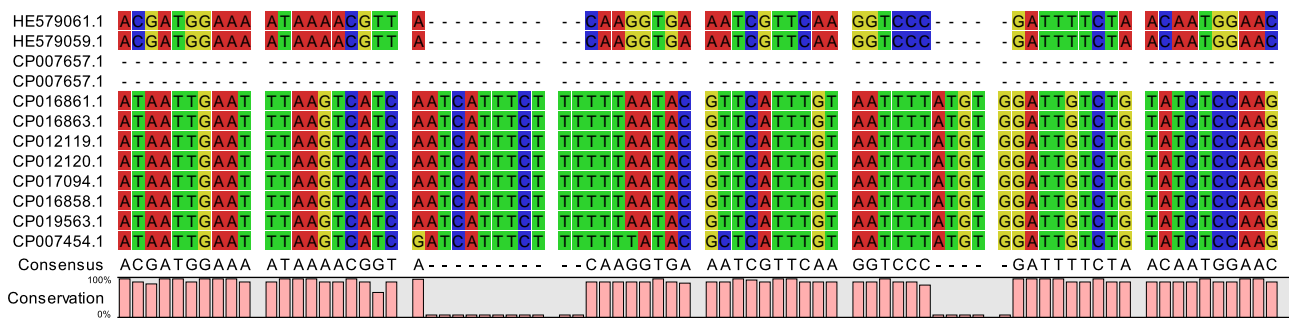

HE579061.1 AAAA CAGACC ATCTT AAGC 733  
 HE579059.1 AAAA CAGACC ATCTT AAGC 733  
 CP007657.1 - - - - -  
 CP007657.1 - - - - -  
 CP016861.1 GATT AAGTCC AGTTT GCTC 1154  
 CP016863.1 GATT AAGTCC AGTTT GCTC 1153  
 CP012119.1 GATT AAGTCC AGTTT GCTC 1154  
 CP012120.1 GATT AAGTCC AGTTT GCTC 1154  
 CP017094.1 GATT AAGTCC AGTTT GCTC 1154  
 CP016858.1 GATT AAGTCC AGTTT GCTC 1154  
 CP019563.1 GATT AAGTCC AGTTT GCTC 1430  
 CP007454.1 GATT AAGTCC AGTTT GCTC 1316

Consensus AAAGCGGCC ATCATT AAGC

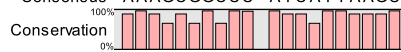







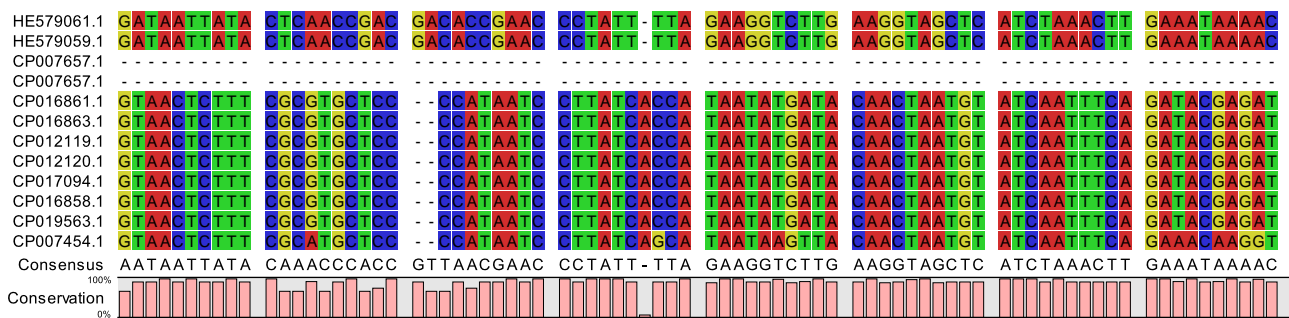

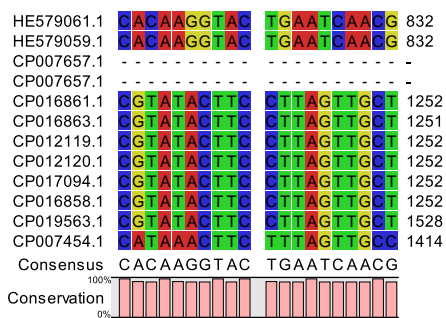



1,800

|            |      |    |     |            |      |
|------------|------|----|-----|------------|------|
| CP007670.1 | TCCG | -- | AGA | CCGCAATTTA | 1500 |
| CP003033.1 | TCCG | -- | AGA | CCGCAATTTA | 1500 |
| CP018205.1 | TCCG | -- | AGA | CCGCAATTTA | 1500 |
| AP017377.1 | TCCG | -- | AGA | CCGCAATTTA | 1500 |
| LT598688.1 | TCCG | -- | AGA | CCGCAATTTA | 1500 |
| CP007676.1 | TCCG | -- | AGA | CCGCAATTTA | 1500 |
| CP007672.1 | TCCG | -- | AGA | CCGCAATTTA | 1500 |
| CP007674.1 | TCCG | -- | AGA | CCGCAATTTA | 1500 |
| CP011526.1 | TCCG | -- | AGA | CCGCAATTTA | 1500 |
| HF937103.1 | TCCG | -- | AGA | CCGCAATTTA | 1500 |
| AP009351.1 | TCCG | -- | AGA | CCGCAATTTA | 1500 |
| CP000046.1 | TCCG | -- | AGA | CCGCAATTTA | 1500 |
| CP000253.1 | TCCG | -- | AGA | CCGCAATTTA | 1500 |
| AC025591.8 | TCCG | -- | AGA | CCGCAATTTA | 1500 |
| LT671859.1 | TCCG | -- | AGA | CCGCAATTTA | 1500 |
| CP007499.1 | TCCG | -- | AGA | CCGCAATTTA | 1500 |
| X17679.1   | TCCG | -- | AGA | CCGCAATTTA | 1500 |
| CP007657.1 | TCCG | -- | AGA | CCGCAATTTA | 1500 |
| CP014444.1 | TCCG | -- | AGA | CCGCAATTTA | 1500 |
| CP014441.1 | TCCG | -- | AGA | CCGCAATTTA | 1500 |
| CP014438.1 | TCCG | -- | AGA | CCGCAATTTA | 1500 |
| CP014435.1 | TCCG | -- | AGA | CCGCAATTTA | 1500 |
| CP014432.1 | TCCG | -- | AGA | CCGCAATTTA | 1500 |
| CP014429.1 | TCCG | -- | AGA | CCGCAATTTA | 1500 |
| CP014426.1 | TCCG | -- | AGA | CCGCAATTTA | 1500 |
| CP014423.1 | TCCG | -- | AGA | CCGCAATTTA | 1500 |
| CP014420.1 | TCCG | -- | AGA | CCGCAATTTA | 1500 |
| CP014415.1 | TCCG | -- | AGA | CCGCAATTTA | 1500 |
| CP014412.1 | TCCG | -- | AGA | CCGCAATTTA | 1500 |
| CP014409.1 | TCCG | -- | AGA | CCGCAATTTA | 1500 |
| CP014407.1 | TCCG | -- | AGA | CCGCAATTTA | 1500 |
| CP014402.1 | TCCG | -- | AGA | CCGCAATTTA | 1500 |
| CP014397.1 | TCCG | -- | AGA | CCGCAATTTA | 1500 |
| CP014392.1 | TCCG | -- | AGA | CCGCAATTTA | 1500 |
| CP014387.1 | TCCG | -- | AGA | CCGCAATTTA | 1500 |
| CP014384.1 | TCCG | -- | AGA | CCGCAATTTA | 1500 |
| CP014381.1 | TCCG | -- | AGA | CCGCAATTTA | 1500 |
| CP014371.1 | TCCG | -- | AGA | CCGCAATTTA | 1500 |
| CP014368.1 | TCCG | -- | AGA | CCGCAATTTA | 1500 |
| CP014365.1 | TCCG | -- | AGA | CCGCAATTTA | 1500 |
| CP014362.1 | TCCG | -- | AGA | CCGCAATTTA | 1500 |
| CP014376.1 | TCCG | -- | AGA | CCGCAATTTA | 1500 |
| CP009423.1 | TCCG | -- | AGA | CCGCAATTTA | 1500 |
| CP016855.1 | TCCG | -- | AGA | CCGCAATTTA | 1500 |
| CP013231.1 | TCCG | -- | AGA | CCGCAATTTA | 1500 |
| CP010300.1 | TCCG | -- | AGA | CCGCAATTTA | 1500 |
| CP010299.1 | TCCG | -- | AGA | CCGCAATTTA | 1500 |
| CP010298.1 | TCCG | -- | AGA | CCGCAATTTA | 1500 |
| CP010297.1 | TCCG | -- | AGA | CCGCAATTTA | 1500 |
| CP010296.1 | TCCG | -- | AGA | CCGCAATTTA | 1500 |
| CP010295.1 | TCCG | -- | AGA | CCGCAATTTA | 1500 |
| CP007690.1 | TCCG | -- | AGA | CCGCAATTTA | 1500 |
| CP007176.1 | TCCG | -- | AGA | CCGCAATTTA | 1500 |
| CP000730.1 | TCCG | -- | AGA | CCGCAATTTA | 1500 |
| CP000255.1 | TCCG | -- | AGA | CCGCAATTTA | 1500 |
| CP007539.1 | TCCG | -- | AGA | CCGCAATTTA | 1499 |
| CP007657.1 | TCCG | -- | AGA | CCGCAATTTA | 1500 |
| AP014921.1 | TCCG | -- | AGA | CCGCAATTTA | 1500 |
| AB436955.1 | TCCG | -- | AGA | CCGCAATTTA | 1408 |
| AB489885.1 | TCCG | -- | AGA | CCGCAATTTA | 1408 |
| AB489873.1 | TCCG | -- | AGA | CCGCAATTTA | 1408 |
| AB489883.1 | TCCG | -- | AGA | CCGCAATTTA | 1408 |
| AB489874.1 | TCCG | -- | AGA | CCGCAATTTA | 1396 |
| LT615218.1 | TCCG | -- | AGA | CCGCAATTTA | 1500 |
| AB436976.1 | TCCG | -- | AGA | CCGCAATTTA | 1500 |
| AB489892.1 | TCCG | -- | AGA | CCGCAATTTA | 1408 |
| AJ306908.1 | AGCG | -- | AGA | CCGCAATTTA | 1500 |
| CP015646.1 | AGCG | -- | AGA | CCGCAATTTA | 1500 |
| AB488510.1 | TCCG | -- | AGA | CCGCAATTTA | 1408 |
| EU105387.1 | TCCG | -- | AGA | CCGCAATTTA | 1440 |
| AB436975.1 | TCCG | -- | AGA | CCGCAATTTA | 1500 |
| AB488499.1 | TCCG | -- | AGA | CCGCAATTTA | 1408 |
| AJ309189.1 | TCCG | -- | AGA | CCGCAATTTA | 1324 |
| FR821779.1 | TCCG | -- | AGA | CCGCAATTTA | 1485 |
| CP012593.1 | TCCG | -- | AGA | CCGCAATTTA | 929  |
| CP012692.1 | TCCG | -- | AGA | CCGCAATTTA | 929  |
| CP013955.1 | TCCG | -- | AGA | CCGCAATTTA | 929  |
| CP013953.1 | TCCG | -- | AGA | CCGCAATTTA | 929  |
| CP014064.1 | TCCG | -- | AGA | CCGCAATTTA | 929  |
| LT009690.1 | TCCG | -- | AGA | CCGCAATTTA | 929  |
| AP017320.1 | TCCG | -- | AGA | CCGCAATTTA | 929  |
| CP010890.1 | TCCG | -- | AGA | CCGCAATTTA | 929  |
| CP001844.2 | TCCG | -- | AGA | CCGCAATTTA | 929  |
| CP001781.1 | TCCG | -- | AGA | CCGCAATTTA | 929  |
| AB488501.1 | TCCG | -- | AGA | CCGCAATTTA | 929  |
| AB489898.1 | TCCG | -- | AGA | CCGCAATTTA | 929  |
| HE579073.1 | TCCG | -- | AGA | CCGCAATTTA | 929  |
| HE579071.1 | TCCG | -- | AGA | CCGCAATTTA | 929  |
| HE579069.1 | TCCG | -- | AGA | CCGCAATTTA | 929  |
| HE579065.1 | TCCG | -- | AGA | CCGCAATTTA | 929  |
| HE579063.1 | TCCG | -- | AGA | CCGCAATTTA | 929  |

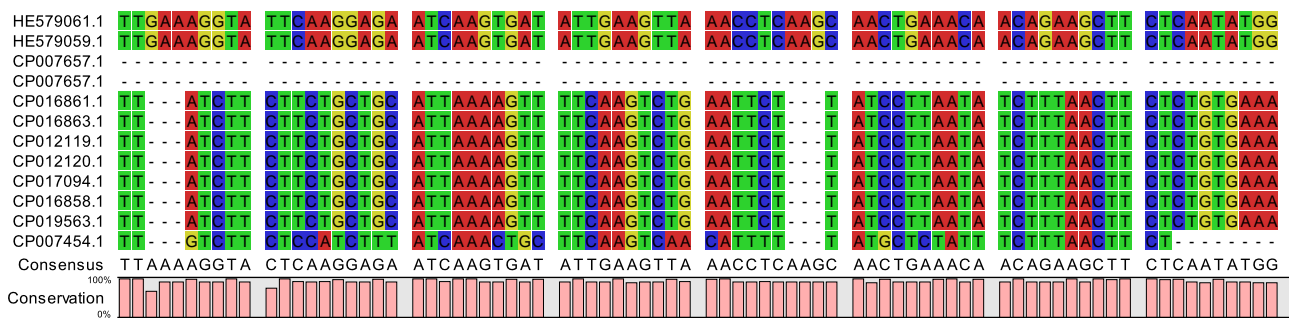

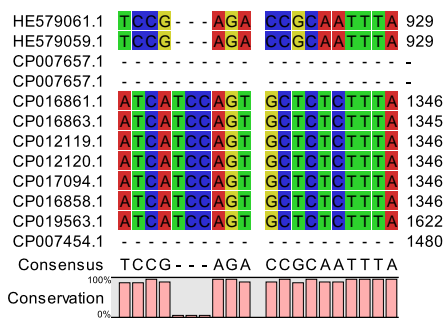







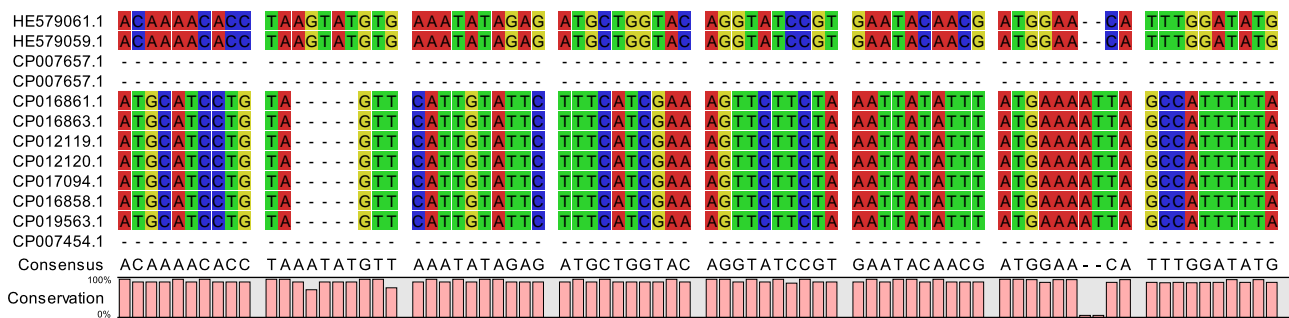

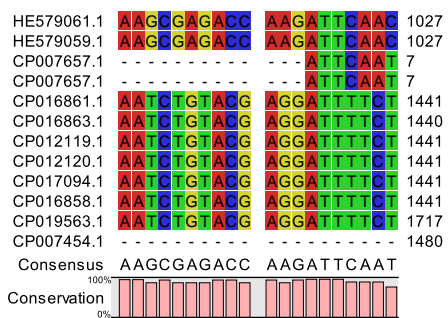

|            | 1,920       | 1,940      | 1,960      | 1,980      |            |            |            |            |
|------------|-------------|------------|------------|------------|------------|------------|------------|------------|
| CP007670.1 | AAGCCATCAG  | AAACAAATGC | ATA        | -----      |            |            |            |            |
| CP003033.1 | AAGCCATCAG  | AAACAAATGC | ATA        | -----      |            |            |            |            |
| CP018205.1 | AAGCCATCAG  | AAACAAATGC | ATA        | -----      |            |            |            |            |
| AP017377.1 | AAGCCATCAG  | AAACAAATGC | ATA        | -----      |            |            |            |            |
| LT598688.1 | AAGCCATCAG  | AAACAAATGC | ATA        | -----      |            |            |            |            |
| CP007676.1 | AAGCCATCAG  | AAACAAATGC | ATA        | -----      |            |            |            |            |
| CP007672.1 | AAGCCATCAG  | AAACAAATGC | ATA        | -----      |            |            |            |            |
| CP007674.1 | AAGCCATCAG  | AAACAAATGC | ATA        | -----      |            |            |            |            |
| CP011526.1 | AAGCCATCAG  | AAACAAATGC | ATA        | -----      |            |            |            |            |
| HF937103.1 | AAGCCATCAG  | AAACAAATGC | ATA        | -----      |            |            |            |            |
| AP009351.1 | AAGCCATCAG  | AAACAAATGC | ATA        | -----      |            |            |            |            |
| CP000046.1 | AAGCCATCAG  | AAACAAATGC | ATA        | -----      |            |            |            |            |
| CP000253.1 | AAGCCATCAG  | AAACAAATGC | ATA        | -----      |            |            |            |            |
| AC025591.8 | AAGCCATCAG  | AAACAAATGC | ATA        | -----      |            |            |            |            |
| LT671859.1 | AAGCCATCAG  | AAACAAATGC | ATA        | -----      |            |            |            |            |
| CP007499.1 | AAGCCATCAG  | AAACAAATGC | ATA        | -----      |            |            |            |            |
| X17679.1   | AAGCCATCAG  | AAACAAATGC | ATA        | -----      |            |            |            |            |
| CP007657.1 | AAGCCATCAG  | AAACAAATGC | ATA        | -----      |            |            |            |            |
| CP014444.1 | AAGCCATCAG  | AAACAAATGC | ATA        | -----      |            |            |            |            |
| CP014441.1 | AAGCCATCAG  | AAACAAATGC | ATA        | -----      |            |            |            |            |
| CP014438.1 | AAGCCATCAG  | AAACAAATGC | ATA        | -----      |            |            |            |            |
| CP014435.1 | AAGCCATCAG  | AAACAAATGC | ATA        | -----      |            |            |            |            |
| CP014432.1 | AAGCCATCAG  | AAACAAATGC | ATA        | -----      |            |            |            |            |
| CP014429.1 | AAGCCATCAG  | AAACAAATGC | ATA        | -----      |            |            |            |            |
| CP014426.1 | AAGCCATCAG  | AAACAAATGC | ATA        | -----      |            |            |            |            |
| CP014423.1 | AAGCCATCAG  | AAACAAATGC | ATA        | -----      |            |            |            |            |
| CP014420.1 | AAGCCATCAG  | AAACAAATGC | ATA        | -----      |            |            |            |            |
| CP014415.1 | AAGCCATCAG  | AAACAAATGC | ATA        | -----      |            |            |            |            |
| CP014412.1 | AAGCCATCAG  | AAACAAATGC | ATA        | -----      |            |            |            |            |
| CP014409.1 | AAGCCATCAG  | AAACAAATGC | ATA        | -----      |            |            |            |            |
| CP014407.1 | AAGCCATCAG  | AAACAAATGC | ATA        | -----      |            |            |            |            |
| CP014402.1 | AAGCCATCAG  | AAACAAATGC | ATA        | -----      |            |            |            |            |
| CP014397.1 | AAGCCATCAG  | AAACAAATGC | ATA        | -----      |            |            |            |            |
| CP014392.1 | AAGCCATCAG  | AAACAAATGC | ATA        | -----      |            |            |            |            |
| CP014387.1 | AAGCCATCAG  | AAACAAATGC | ATA        | -----      |            |            |            |            |
| CP014384.1 | AAGCCATCAG  | AAACAAATGC | ATA        | -----      |            |            |            |            |
| CP014381.1 | AAGCCATCAG  | AAACAAATGC | ATA        | -----      |            |            |            |            |
| CP014371.1 | AAGCCATCAG  | AAACAAATGC | ATA        | -----      |            |            |            |            |
| CP014368.1 | AAGCCATCAG  | AAACAAATGC | ATA        | -----      |            |            |            |            |
| CP014365.1 | AAGCCATCAG  | AAACAAATGC | ATA        | -----      |            |            |            |            |
| CP014362.1 | AAGCCATCAG  | AAACAAATGC | ATA        | -----      |            |            |            |            |
| CP014376.1 | AAGCCATCAG  | AAACAAATGC | ATA        | -----      |            |            |            |            |
| CP009423.1 | AAGCCATCAG  | AAACAAATGC | ATA        | -----      |            |            |            |            |
| CP016855.1 | AAGCCATCAG  | AAACAAATGC | ATA        | -----      |            |            |            |            |
| CP013231.1 | AAGCCATCAG  | AAACAAATGC | ATA        | -----      |            |            |            |            |
| CP010300.1 | AAGCCATCAG  | AAACAAATGC | ATA        | -----      |            |            |            |            |
| CP010299.1 | AAGCCATCAG  | AAACAAATGC | ATA        | -----      |            |            |            |            |
| CP010298.1 | AAGCCATCAG  | AAACAAATGC | ATA        | -----      |            |            |            |            |
| CP010297.1 | AAGCCATCAG  | AAACAAATGC | ATA        | -----      |            |            |            |            |
| CP010296.1 | AAGCCATCAG  | AAACAAATGC | ATA        | -----      |            |            |            |            |
| CP010295.1 | AAGCCATCAG  | AAACAAATGC | ATA        | -----      |            |            |            |            |
| CP007690.1 | AAGCCATCAG  | AAACAAATGC | ATA        | -----      |            |            |            |            |
| CP007176.1 | AAGCCATCAG  | AAACAAATGC | ATA        | -----      |            |            |            |            |
| CP000730.1 | AAGCCATCAG  | AAACAAATGC | ATA        | -----      |            |            |            |            |
| CP000255.1 | AAGCCATCAG  | AAACAAATGC | ATA        | -----      |            |            |            |            |
| CP007539.1 | AAGCCATCAG  | AAACAAATGC | ATA        | -----      |            |            |            |            |
| CP007657.1 | AAGCCATCAG  | AAACAAATGC | ATA        | -----      |            |            |            |            |
| AP014921.1 | AAGCCATCAG  | AAACAAATGC | ATA        | -----      |            |            |            |            |
| AB436955.1 | AAGCCATCAG  | AAACAAATGC | ATA        | -----      |            |            |            |            |
| AB489885.1 | AAGCCATCAG  | AAACAAATGC | ATA        | -----      |            |            |            |            |
| AB489873.1 | AAGCCATCAG  | AAACAAATGC | ATA        | -----      |            |            |            |            |
| AB489883.1 | AAGCCATCAG  | AAACAAATGC | ATA        | -----      |            |            |            |            |
| AB489874.1 | AAGCCATCAG  | AAACAAATGC | ATA        | -----      |            |            |            |            |
| LT615218.1 | AAGCCATCAG  | AAACAAAGCG | ATACAAAGTA | ACGACAAATC | AAGATGGCAC | AGTAACATAT | GGGCGTCGTC | CAACACAAAA |
| AB436976.1 | AAGCCATCAG  | AAACAAAGCG | ATACAAAGTA | ACGACAAATC | AAGATGGCAC | AGTAACATAT | GGGCGTCGTC | CAACACAAAA |
| AB489892.1 | AAGCCATCAG  | AAACAAAGCG | ATACAAAGTA | ACGACAAATC | AAGATGGCAC | AGTAACATAT | GGGCGTCGTC | CAACACAAAA |
| AJ306908.1 | AAGCCATCAG  | AAACAAAGCG | ATACAAAGTA | ACGACAAATC | AAGATGGCAC | AGTAACATAT | GGGCGTCGTC | CAACACAAAA |
| CP015646.1 | AAGCCATCAG  | AAACAAAGCG | ATACAAAGTA | ACGACAAATC | AAGATGGCAC | AGTAACATAT | GGGCGTCGTC | CAACACAAAA |
| AB488510.1 | AAGCCATCAG  | AAACAAATGC | ATA        | -----      | -----      | -----      | -----      | -----      |
| EU105387.1 | -----       | -----      | -----      | -----      | -----      | -----      | -----      | -----      |
| AB436975.1 | AAGCCATCAG  | AAACAAAGCG | ATACAAAGTA | ACGACAAACC | AAGATGGCAC | AGTATCATAC | GGGCGTCGTC | CGACATACAA |
| AB488499.1 | AAGCCATCAG  | AAACAAAGCG | ATACAAAGTA | ACGACAAACC | AAGATGGCAC | AGTATCATAC | GGGCGTCGTC | CGACATACAA |
| AJ309189.1 | -----       | -----      | -----      | -----      | -----      | -----      | -----      | -----      |
| FR821779.1 | AAGCCAAAGTG | AAACAAAGCG | ATACAAAGTA | ACGACAAATC | AAGATGGCAC | AGTATCATAT | GGGCGTCGTC | CGACACAAAA |
| CP012593.1 | AAGCCAAAGTG | AAACAAATGC | ATACAAAGTA | ACGACAAATC | AAGATGGCAC | AGTATCATAC | GGGCGTCGTC | CAACACAAAA |
| CP012692.1 | AAGCCAAAGTG | AAACAAATGC | ATACAAAGTA | ACGACAAATC | AAGATGGCAC | AGTATCATAC | GGGCGTCGTC | CAACACAAAA |
| CP013955.1 | AAGCCAAAGTG | AAACAAATGC | ATACAAAGTA | ACGACAAATC | AAGATGGCAC | AGTATCATAC | GGGCGTCGTC | CAACACAAAA |
| CP013953.1 | AAGCCAAAGTG | AAACAAATGC | ATACAAAGTA | ACGACAAATC | AAGATGGCAC | AGTATCATAC | GGGCGTCGTC | CAACACAAAA |
| CP014064.1 | AAGCCAAAGTG | AAACAAATGC | ATACAAAGTA | ACGACAAATC | AAGATGGCAC | AGTATCATAC | GGGCGTCGTC | CAACACAAAA |
| LT009690.1 | AAGCCAAAGTG | AAACAAATGC | ATACAAAGTA | ACGACAAATC | AAGATGGCAC | AGTATCATAC | GGGCGTCGTC | CAACACAAAA |
| AP017320.1 | AAGCCAAAGTG | AAACAAATGC | ATACAAAGTA | ACGACAAATC | AAGATGGCAC | AGTATCATAC | GGGCGTCGTC | CAACACAAAA |
| CP010890.1 | AAGCCAAAGTG | AAACAAATGC | ATACAAAGTA | ACGACAAATC | AAGATGGCAC | AGTATCATAC | GGGCGTCGTC | CAACACAAAA |
| CP001844.2 | AAGCCAAAGTG | AAACAAATGC | ATACAAAGTA | ACGACAAATC | AAGATGGCAC | AGTATCATAC | GGGCGTCGTC | CAACACAAAA |
| CP001781.1 | AAGCCAAAGTG | AAACAAATGC | ATACAAAGTA | ACGACAAATC | AAGATGGCAC | AGTATCATAC | GGGCGTCGTC | CAACACAAAA |
| AB488501.1 | AAGCCAAAGTG | AAACAAATGC | ATACAAAGTA | ACGACAAATC | AAGATGGCAC | AGTATCATAC | GGGCGTCGTC | CAACACAAAA |
| AB489898.1 | AAGCCAAAGTG | AAACAAATGC | ATACAAAGTA | ACGACAAATC | AAGATGGCAC | AGTATCATAC | GGGCGTCGTC | CAACACAAAA |
| HE579073.1 | AAGCCAAAGTG | AAACAAATGC | ATACAAAGTA | ACGACAAATC | AAGATGGCAC | AGTATCATAC | GGGCGTCGTC | CAACACAAAA |
| HE579071.1 | AAGCCAAAGTG | AAACAAATGC | ATACAAAGTA | ACGACAAATC | AAGATGGCAC | AGTATCATAC | GGGCGTCGTC | CAACACAAAA |
| HE579069.1 | AAGCCAAAGTG | AAACAAATGC | ATACAAAGTA | ACGACAAATC | AAGATGGCAC | AGTATCATAC | GGGCGTCGTC | CAACACAAAA |
| HE579065.1 | AAGCCAAAGTG | AAACAAATGC | ATACAAAGTA | ACGACAAATC | AAGATGGCAC | AGTATCATAC | GGGCGTCGTC | CAACACAAAA |
| HE579063.1 | AAGCCAAAGTG | AAACAAATGC | ATACAAAGTA | ACGACAAATC | AAGATGGCAC | AGTATCATAC | GGGCGTCGTC | CAACACAAAA |

2,000

|            |             |             |      |
|------------|-------------|-------------|------|
| CP007670.1 | -----       | -----       | 1621 |
| CP003033.1 | -----       | -----       | 1621 |
| CP018205.1 | -----       | -----       | 1621 |
| AP017377.1 | -----       | -----       | 1621 |
| LT598688.1 | -----       | -----       | 1621 |
| CP007676.1 | -----       | -----       | 1621 |
| CP007672.1 | -----       | -----       | 1621 |
| CP007674.1 | -----       | -----       | 1621 |
| CP011526.1 | -----       | -----       | 1621 |
| HF937103.1 | -----       | -----       | 1621 |
| AP009351.1 | -----       | -----       | 1621 |
| CP000046.1 | -----       | -----       | 1621 |
| CP000253.1 | -----       | -----       | 1621 |
| AC025591.8 | -----       | -----       | 1621 |
| LT671859.1 | -----       | -----       | 1621 |
| CP007499.1 | -----       | -----       | 1621 |
| X17679.1   | -----       | -----       | 1621 |
| CP007657.1 | -----       | -----       | 1621 |
| CP014444.1 | -----       | -----       | 1621 |
| CP014441.1 | -----       | -----       | 1621 |
| CP014438.1 | -----       | -----       | 1621 |
| CP014435.1 | -----       | -----       | 1621 |
| CP014432.1 | -----       | -----       | 1621 |
| CP014429.1 | -----       | -----       | 1621 |
| CP014426.1 | -----       | -----       | 1621 |
| CP014423.1 | -----       | -----       | 1621 |
| CP014420.1 | -----       | -----       | 1621 |
| CP014415.1 | -----       | -----       | 1621 |
| CP014412.1 | -----       | -----       | 1621 |
| CP014409.1 | -----       | -----       | 1621 |
| CP014407.1 | -----       | -----       | 1621 |
| CP014402.1 | -----       | -----       | 1621 |
| CP014397.1 | -----       | -----       | 1621 |
| CP014392.1 | -----       | -----       | 1621 |
| CP014387.1 | -----       | -----       | 1621 |
| CP014384.1 | -----       | -----       | 1621 |
| CP014381.1 | -----       | -----       | 1621 |
| CP014371.1 | -----       | -----       | 1621 |
| CP014368.1 | -----       | -----       | 1621 |
| CP014365.1 | -----       | -----       | 1621 |
| CP014362.1 | -----       | -----       | 1621 |
| CP014376.1 | -----       | -----       | 1621 |
| CP009423.1 | -----       | -----       | 1621 |
| CP016855.1 | -----       | -----       | 1621 |
| CP013231.1 | -----       | -----       | 1621 |
| CP010300.1 | -----       | -----       | 1621 |
| CP010299.1 | -----       | -----       | 1621 |
| CP010298.1 | -----       | -----       | 1621 |
| CP010297.1 | -----       | -----       | 1621 |
| CP010296.1 | -----       | -----       | 1621 |
| CP010295.1 | -----       | -----       | 1621 |
| CP007690.1 | -----       | -----       | 1621 |
| CP007176.1 | -----       | -----       | 1621 |
| CP000730.1 | -----       | -----       | 1621 |
| CP000255.1 | -----       | -----       | 1621 |
| CP007539.1 | -----       | -----       | 1620 |
| CP007657.1 | -----       | -----       | 1621 |
| AP014921.1 | -----       | -----       | 1621 |
| AB436955.1 | -----       | -----       | 1529 |
| AB489885.1 | -----       | -----       | 1529 |
| AB489873.1 | -----       | -----       | 1529 |
| AB489883.1 | -----       | -----       | 1529 |
| AB489874.1 | -----       | -----       | 1517 |
| LT615218.1 | CAAAGCCAAGT | AAAAAGAAACG | 1698 |
| AB436976.1 | CAAAGCCAAGT | AAAAAGAAACG | 1698 |
| AB489892.1 | CAAAGCCAAGT | AAAAAGAAACG | 1606 |
| AJ306908.1 | CAAAGCCAAGT | AAAAAGAAACG | 1698 |
| CP015646.1 | CAAAGCCAAGT | AAAAAGAAACG | 1698 |
| AB488510.1 | -----       | -----       | 1529 |
| EU105387.1 | -----       | -----       | 1520 |
| AB436975.1 | TAAAGCCATCA | GAAACAAAACG | 1698 |
| AB488499.1 | TAAAGCCATCA | GAAACAAAACG | 1606 |
| AJ309189.1 | -----       | -----       | 1386 |
| FR821779.1 | CAAAGCCAAGC | GAAACAAAATG | 1683 |
| CP012593.1 | CAAAGCCAAGT | GAAACAAAACG | 1127 |
| CP012692.1 | CAAAGCCAAGT | GAAACAAAACG | 1127 |
| CP013955.1 | CAAAGCCAAGT | GAAACAAAACG | 1127 |
| CP013953.1 | CAAAGCCAAGT | GAAACAAAACG | 1127 |
| CP014064.1 | CAAAGCCAAGT | GAAACAAAACG | 1127 |
| LT009690.1 | CAAAGCCAAGT | GAAACAAAACG | 1127 |
| AP017320.1 | CAAAGCCAAGT | GAAACAAAACG | 1127 |
| CP010890.1 | CAAAGCCAAGT | GAAACAAAACG | 1127 |
| CP001844.2 | CAAAGCCAAGT | GAAACAAAACG | 1127 |
| CP001781.1 | CAAAGCCAAGT | GAAACAAAACG | 1127 |
| AB488501.1 | CAAAGCCAAGT | GAAACAAAACG | 1127 |
| AB489898.1 | CAAAGCCAAGT | GAAACAAAACG | 1127 |
| HE579073.1 | CAAAGCCAAGT | GAAACAAAACG | 1127 |
| HE579071.1 | CAAAGCCAAGT | GAAACAAAACG | 1127 |
| HE579069.1 | CAAAGCCAAGT | GAAACAAAACG | 1127 |
| HE579065.1 | CAAAGCCAAGT | GAAACAAAACG | 1127 |
| HE579063.1 | CAAAGCCAAGT | GAAACAAAACG | 1127 |

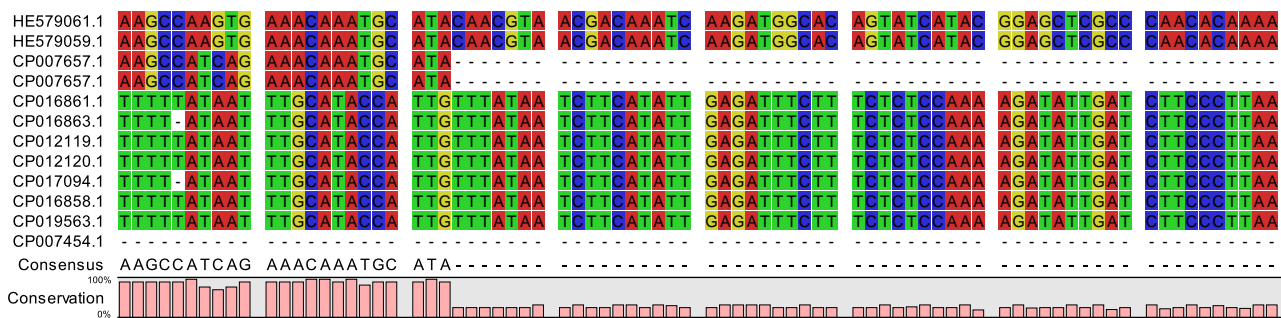

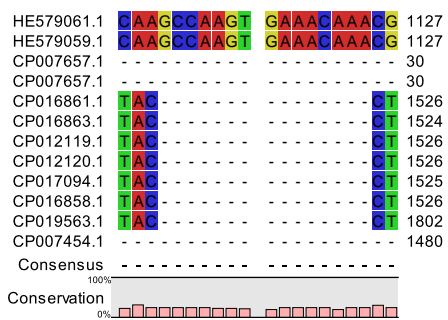





2,100

|            |                     |                     |      |
|------------|---------------------|---------------------|------|
| CP007670.1 | G C A T A C A A T G | T A A C A A C A C A | 1717 |
| CP003033.1 | G C A T A C A A T G | T A A C A A C A C A | 1717 |
| CP018205.1 | G C A T A C A A T G | T A A C A A C A C A | 1717 |
| AP017377.1 | G C A T A C A A T G | T A A C A A C A C A | 1717 |
| LT598688.1 | G C A T A C A A T G | T A A C A A C A C A | 1717 |
| CP007676.1 | G C A T A C A A T G | T A A C A A C A C A | 1717 |
| CP007672.1 | G C A T A C A A T G | T A A C A A C A C A | 1717 |
| CP007674.1 | G C A T A C A A T G | T A A C A A C A C A | 1717 |
| CP011526.1 | G C A T A C A A T G | T A A C A A C A C A | 1717 |
| HF937103.1 | G C A T A C A A T G | T A A C A A C A C A | 1717 |
| AP009351.1 | G C A T A C A A T G | T A A C A A C A C A | 1717 |
| CP000046.1 | G C A T A C A A T G | T A A C A A C A C A | 1717 |
| CP000253.1 | G C A T A C A A T G | T A A C A A C A C A | 1717 |
| AC025591.8 | G C A T A C A A T G | T A A C A A C A C A | 1717 |
| LT671859.1 | G C A T A C A A T G | T A A C A A C A C A | 1717 |
| CP007499.1 | G C A T A C A A T G | T A A C A A C A C A | 1717 |
| X17679.1   | G C A T A C A A T G | T A A C A A C A C A | 1717 |
| CP007657.1 | G C A T A C A A T G | T A A C A A C A C A | 1717 |
| CP014444.1 | -----               | -----               | 1673 |
| CP014441.1 | -----               | -----               | 1673 |
| CP014438.1 | -----               | -----               | 1673 |
| CP014435.1 | -----               | -----               | 1673 |
| CP014432.1 | -----               | -----               | 1673 |
| CP014429.1 | -----               | -----               | 1673 |
| CP014426.1 | -----               | -----               | 1673 |
| CP014423.1 | -----               | -----               | 1673 |
| CP014420.1 | -----               | -----               | 1673 |
| CP014415.1 | -----               | -----               | 1673 |
| CP014412.1 | -----               | -----               | 1673 |
| CP014409.1 | -----               | -----               | 1673 |
| CP014407.1 | -----               | -----               | 1673 |
| CP014402.1 | -----               | -----               | 1673 |
| CP014397.1 | -----               | -----               | 1673 |
| CP014392.1 | -----               | -----               | 1673 |
| CP014387.1 | -----               | -----               | 1673 |
| CP014384.1 | -----               | -----               | 1673 |
| CP014381.1 | -----               | -----               | 1673 |
| CP014371.1 | -----               | -----               | 1673 |
| CP014368.1 | -----               | -----               | 1673 |
| CP014365.1 | -----               | -----               | 1673 |
| CP014362.1 | -----               | -----               | 1673 |
| CP014376.1 | -----               | -----               | 1673 |
| CP009423.1 | -----               | -----               | 1673 |
| CP016855.1 | -----               | -----               | 1673 |
| CP013231.1 | -----               | -----               | 1673 |
| CP010300.1 | -----               | -----               | 1673 |
| CP010299.1 | -----               | -----               | 1673 |
| CP010298.1 | -----               | -----               | 1673 |
| CP010297.1 | -----               | -----               | 1673 |
| CP010296.1 | -----               | -----               | 1673 |
| CP010295.1 | -----               | -----               | 1673 |
| CP007690.1 | -----               | -----               | 1673 |
| CP007176.1 | -----               | -----               | 1673 |
| CP000730.1 | -----               | -----               | 1673 |
| CP000255.1 | -----               | -----               | 1673 |
| CP007539.1 | G C A T A C A A T G | T A A C A A C A C A | 1716 |
| CP007657.1 | G C A T A C A A T G | T A A C A A C A C A | 1717 |
| AP014921.1 | -----               | -----               | 1673 |
| AB436955.1 | G C A T A C A A T G | T A A C A A C A C A | 1625 |
| AB489885.1 | G C A T A C A A T G | T A A C A A C A C A | 1625 |
| AB489873.1 | G C A T A C A A T G | T A A C A A C A C A | 1625 |
| AB489883.1 | -----               | -----               | 1581 |
| AB489874.1 | -----               | -----               | 1569 |
| LT615218.1 | G C A T A C A A C G | T A A C A A C A C A | 1798 |
| AB436976.1 | G C A T A C A A C G | T A A C A A C A C A | 1798 |
| AB489892.1 | G C A T A C A A C G | T A A C A A C A C A | 1706 |
| AJ306908.1 | G C A T A C A A T G | T A A C A A C A C A | 1798 |
| CP015646.1 | G C A T A C A A T G | T A A C A A C A C A | 1798 |
| AB488510.1 | -----               | -----               | 1568 |
| EU105387.1 | -----               | -----               | 1520 |
| AB436975.1 | G C A T A T A A C G | T A A C A A C A C A | 1798 |
| AB488499.1 | G C A T A T A A C G | T A A C A A C A C A | 1706 |
| AJ309189.1 | -----               | -----               | 1386 |
| FR821779.1 | G C A T A T A A C G | T A A C A A C A C A | 1783 |
| CP012593.1 | G C A T A C A A C G | T A A C A A C A C A | 1227 |
| CP012692.1 | G C A T A C A A C G | T A A C A A C A C A | 1227 |
| CP013955.1 | G C A T A C A A C G | T A A C A A C A C A | 1227 |
| CP013953.1 | G C A T A C A A C G | T A A C A A C A C A | 1227 |
| CP014064.1 | G C A T A C A A C G | T A A C A A C A C A | 1227 |
| LT009690.1 | G C A T A C A A C G | T A A C A A C A C A | 1227 |
| AP017320.1 | G C A T A C A A C G | T A A C A A C A C A | 1227 |
| CP010890.1 | G C A T A C A A C G | T A A C A A C A C A | 1227 |
| CP001844.2 | G C A T A C A A C G | T A A C A A C A C A | 1227 |
| CP001781.1 | G C A T A C A A C G | T A A C A A C A C A | 1227 |
| AB488501.1 | G C A T A C A A C G | T A A C A A C A C A | 1227 |
| AB489898.1 | G C A T A C A A C G | T A A C A A C A C A | 1227 |
| HE579073.1 | G C A T A C A A C G | T A A C A A C A C A | 1227 |
| HE579071.1 | G C A T A C A A C G | T A A C A A C A C A | 1227 |
| HE579069.1 | G C A T A C A A C G | T A A C A A C A C A | 1227 |
| HE579065.1 | G C A T A C A A C G | T A A C A A C A C A | 1227 |
| HE579063.1 | G C A T A C A A C G | T A A C A A C A C A | 1227 |

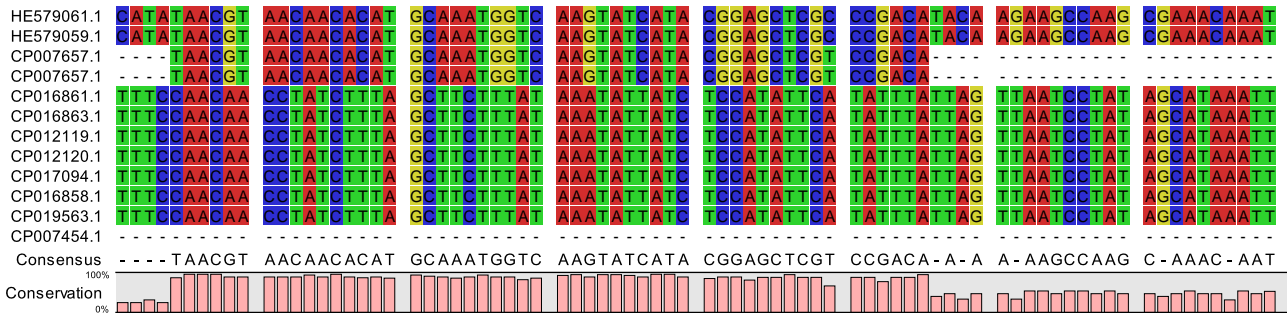

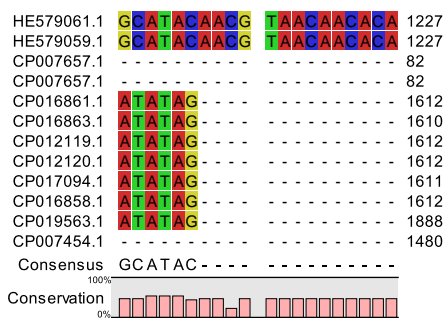





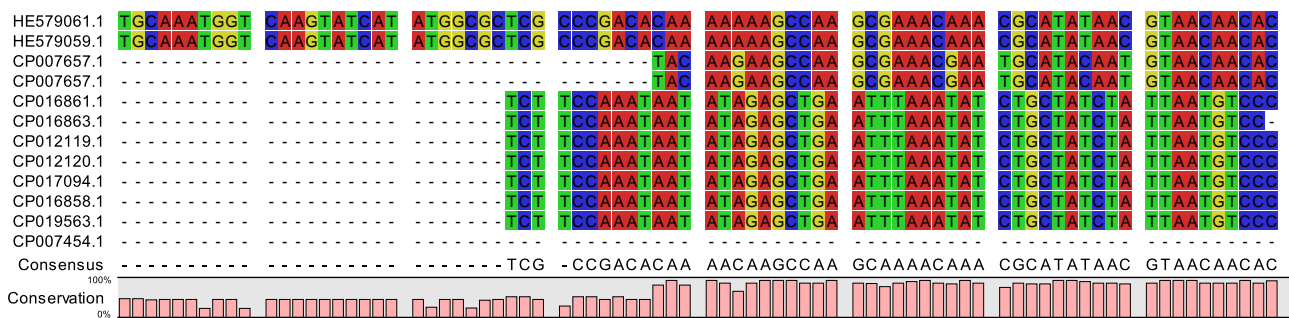

HE579061.1 ATGC AAA TGG TCAAGTATCA 1327  
 HE579059.1 ATGC AAA TGG TCAAGTATCA 1327  
 CP007657.1 ATGG AAA CGG CCAAGTATCA 145  
 CP007657.1 ATGG AAA CGG CCAAGTATCA 145  
 CP016861.1 ATTTT A CTC CCA - GCATTA 1684  
 CP016863.1 ATTTT A CTC CCA - GCATTA 1681  
 CP012119.1 ATTTT A CTC CCA - GCATTA 1684  
 CP012120.1 ATTTT A CTC CCA - GCATTA 1684  
 CP017094.1 ATTTT A CTC CCA - GCATTA 1683  
 CP016858.1 ATTTT A CTC CCA - GCATTA 1684  
 CP019563.1 ATTTT A CTC CCA - GCATTA 1960  
 CP007454.1 ----- 1480

Consensus ATGGAAACGG CCAAGTATCA

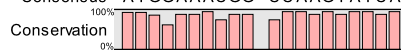





2,300

|            |            |             |       |      |
|------------|------------|-------------|-------|------|
| CP007670.1 | CATACGGAGC | TCGCCG      | ----  | 1912 |
| CP003033.1 | CATACGGAGC | TCGCCG      | ----  | 1912 |
| CP018205.1 | CATACGGAGC | TCGCCG      | ----  | 1912 |
| AP017377.1 | CATACGGAGC | TCGCCG      | ----  | 1912 |
| LT598688.1 | CATACGGAGC | TCGCCG      | ----  | 1912 |
| CP007676.1 | CATACGGAGC | TCGCCG      | ----  | 1912 |
| CP007672.1 | CATACGGAGC | TCGCCG      | ----  | 1912 |
| CP007674.1 | CATACGGAGC | TCGCCG      | ----  | 1912 |
| CP011526.1 | CATACGGAGC | TCGCCG      | ----  | 1912 |
| HF937103.1 | CATACGGAGC | TCGCCG      | ----  | 1912 |
| AP009351.1 | CATACGGAGC | TCGCCG      | ----  | 1912 |
| CP000046.1 | CATACGGAGC | TCGCCG      | ----  | 1912 |
| CP000253.1 | CATACGGAGC | TCGCCG      | ----  | 1912 |
| AC025591.8 | CATACGGAGC | TCGCCG      | ----  | 1912 |
| LT671859.1 | CATACGGAGC | TCGCCG      | ----  | 1912 |
| CP007499.1 | CATACGGAGC | TCGCCG      | ----  | 1912 |
| X17679.1   | CATACGGAGC | TCGCCG      | ----  | 1912 |
| CP007657.1 | CATACGGAGC | TCGCCG      | ----  | 1831 |
| CP014444.1 | CATACGGAGC | TCGCCG      | ----  | 1831 |
| CP014441.1 | CATACGGAGC | TCGCCG      | ----  | 1831 |
| CP014438.1 | CATACGGAGC | TCGCCG      | ----  | 1831 |
| CP014435.1 | CATACGGAGC | TCGCCG      | ----  | 1831 |
| CP014432.1 | CATACGGAGC | TCGCCG      | ----  | 1831 |
| CP014429.1 | CATACGGAGC | TCGCCG      | ----  | 1831 |
| CP014426.1 | CATACGGAGC | TCGCCG      | ----  | 1831 |
| CP014423.1 | CATACGGAGC | TCGCCG      | ----  | 1831 |
| CP014420.1 | CATACGGAGC | TCGCCG      | ----  | 1831 |
| CP014415.1 | CATACGGAGC | TCGCCG      | ----  | 1831 |
| CP014412.1 | CATACGGAGC | TCGCCG      | ----  | 1831 |
| CP014409.1 | CATACGGAGC | TCGCCG      | ----  | 1831 |
| CP014407.1 | CATACGGAGC | TCGCCG      | ----  | 1831 |
| CP014402.1 | CATACGGAGC | TCGCCG      | ----  | 1831 |
| CP014397.1 | CATACGGAGC | TCGCCG      | ----  | 1831 |
| CP014392.1 | CATACGGAGC | TCGCCG      | ----  | 1831 |
| CP014387.1 | CATACGGAGC | TCGCCG      | ----  | 1831 |
| CP014384.1 | CATACGGAGC | TCGCCG      | ----  | 1831 |
| CP014381.1 | CATACGGAGC | TCGCCG      | ----  | 1831 |
| CP014371.1 | CATACGGAGC | TCGCCG      | ----  | 1831 |
| CP014368.1 | CATACGGAGC | TCGCCG      | ----  | 1831 |
| CP014365.1 | CATACGGAGC | TCGCCG      | ----  | 1831 |
| CP014362.1 | CATACGGAGC | TCGCCG      | ----  | 1831 |
| CP014376.1 | CATACGGAGC | TCGCCG      | ----  | 1831 |
| CP009423.1 | CATACGGAGC | TCGCCG      | ----  | 1831 |
| CP016855.1 | CATACGGAGC | TCGCCG      | ----  | 1831 |
| CP013231.1 | CATACGGAGC | TCGCCG      | ----  | 1831 |
| CP010300.1 | CATACGGAGC | TCGCCG      | ----  | 1831 |
| CP010299.1 | CATACGGAGC | TCGCCG      | ----  | 1831 |
| CP010298.1 | CATACGGAGC | TCGCCG      | ----  | 1831 |
| CP010297.1 | CATACGGAGC | TCGCCG      | ----  | 1831 |
| CP010296.1 | CATACGGAGC | TCGCCG      | ----  | 1831 |
| CP010295.1 | CATACGGAGC | TCGCCG      | ----  | 1831 |
| CP007690.1 | CATACGGAGC | TCGCCG      | ----  | 1831 |
| CP007176.1 | CATACGGAGC | TCGCCG      | ----  | 1831 |
| CP000730.1 | CATACGGAGC | TCGCCG      | ----  | 1831 |
| CP000255.1 | CATACGGAGC | TCGCCG      | ----  | 1831 |
| CP007539.1 | CATACGGAGC | TCGCCG      | ----  | 1911 |
| CP007657.1 | CATACGGAGC | TCGCCG      | ----  | 1831 |
| AP014921.1 | CATACGGAGC | TCGCCG      | ----  | 1831 |
| AB436955.1 | CATACGGAGC | TCGCCG      | ----  | 1820 |
| AB489885.1 | CATACGGAGC | TCGCCG      | ----  | 1820 |
| AB489873.1 | CATACGGAGC | TCGCCG      | ----  | 1820 |
| AB489883.1 | CATACGGAGC | TCGCCG      | ----  | 1739 |
| AB489874.1 | CATACGGAGC | TCGCCG      | ----  | 1727 |
| LT615218.1 | CATATGGCGG | TCGCCGAAACA | ----  | 1997 |
| AB436976.1 | CATATGGCGG | TCGCCGAAACA | ----  | 1997 |
| AB489892.1 | CATATGGCGG | TCGCCGAAACA | ----  | 1905 |
| AJ306908.1 | CATATGGCGG | TCGCCGAAACA | ----  | 1997 |
| CP015646.1 | CATATGGCGG | TCGCCGAAACA | ----  | 1997 |
| AB488510.1 | -----      | -----       | ----- | 1568 |
| EU105387.1 | -----      | -----       | ----- | 1520 |
| AB436975.1 | CATATGGCGG | TCGCCGAAACA | ----  | 1997 |
| AB488499.1 | CATATGGCGG | TCGCCGAAACA | ----  | 1905 |
| AJ309189.1 | -----      | -----       | ----- | 1386 |
| FR821779.1 | CATACGGTGG | TCGCCGAAACA | ----  | 1982 |
| CP012593.1 | CATATGGCGG | TCGCCG      | ----  | 1422 |
| CP012692.1 | CATATGGCGG | TCGCCG      | ----  | 1422 |
| CP013955.1 | CATATGGCGG | TCGCCG      | ----  | 1422 |
| CP013953.1 | CATATGGCGG | TCGCCG      | ----  | 1422 |
| CP014064.1 | CATATGGCGG | TCGCCG      | ----  | 1422 |
| LT009690.1 | CATATGGCGG | TCGCCG      | ----  | 1422 |
| AP017320.1 | CATATGGCGG | TCGCCG      | ----  | 1422 |
| CP010890.1 | CATATGGCGG | TCGCCG      | ----  | 1422 |
| CP001844.2 | CATATGGCGG | TCGCCG      | ----  | 1422 |
| CP001781.1 | CATATGGCGG | TCGCCG      | ----  | 1422 |
| AB488501.1 | CATATGGCGG | TCGCCG      | ----  | 1422 |
| AB489898.1 | CATATGGCGG | TCGCCG      | ----  | 1422 |
| HE579073.1 | CATATGGCGG | TCGCCG      | ----  | 1422 |
| HE579071.1 | CATATGGCGG | TCGCCG      | ----  | 1422 |
| HE579069.1 | CATATGGCGG | TCGCCG      | ----  | 1422 |
| HE579065.1 | CATATGGCGG | TCGCCG      | ----  | 1422 |
| HE579063.1 | CATATGGCGG | TCGCCG      | ----  | 1422 |

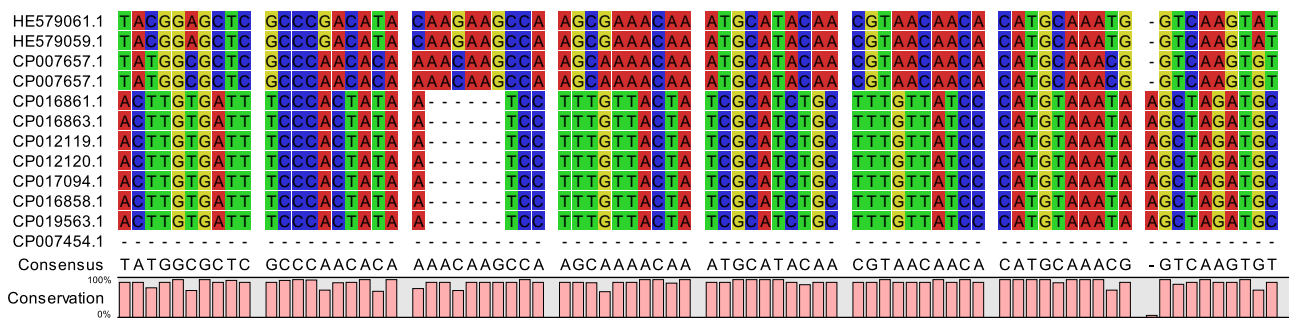

HE579061.1 CATATGGCGC TCGCC - - - 1422  
 HE579059.1 CATATGGCGC TCGCC - - - 1422  
 CP007657.1 CATACGGAGC TCGCC - - - 240  
 CP007657.1 CATACGGAGC TCGCC - - - 240  
 CP016861.1 AACTGCTAAT GCGCCTAGCG 1778  
 CP016863.1 AACTGCTAAT GCGCCTAGCG 1775  
 CP012119.1 AACTGCTAAT GCGCCTAGCG 1778  
 CP012120.1 AACTGCTAAT GCGCCTAGCG 1778  
 CP017094.1 AACTGCTAAT GCGCCTAGCG 1777  
 CP016858.1 AACTGCTAAT GCGCCTAGCG 1778  
 CP019563.1 AACTGCTAAT GCGCCTAGCG 2054  
 CP007454.1 - - - - - 1480

Consensus CATACGGAGC TCGCC - - -

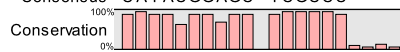

|            | 2,320      | 2,340      | 2,360       | 2,380      |            |            |            |            |
|------------|------------|------------|-------------|------------|------------|------------|------------|------------|
| CP007670.1 |            |            |             | -GAC       |            |            |            |            |
| CP003033.1 |            |            |             | -GAC       |            |            |            |            |
| CP018205.1 |            |            |             | -GAC       |            |            |            |            |
| AP017377.1 |            |            |             | -GAC       |            |            |            |            |
| LT598688.1 |            |            |             | -GAC       |            |            |            |            |
| CP007676.1 |            |            |             | -GAC       |            |            |            |            |
| CP007672.1 |            |            |             | -GAC       |            |            |            |            |
| CP007674.1 |            |            |             | -GAC       |            |            |            |            |
| CP011526.1 |            |            |             | -GAC       |            |            |            |            |
| HF937103.1 |            |            |             | -GAC       |            |            |            |            |
| AP009351.1 |            |            |             | -GAC       |            |            |            |            |
| CP000046.1 |            |            |             | -GAC       |            |            |            |            |
| CP000253.1 |            |            |             | -GAC       |            |            |            |            |
| AC025591.8 |            |            |             | -GAC       |            |            |            |            |
| LT671859.1 |            |            |             | -GAC       |            |            |            |            |
| CP007499.1 |            |            |             | -GAC       |            |            |            |            |
| X17679.1   |            |            |             | -GAC       |            |            |            |            |
| CP007657.1 |            |            |             | -GAC       |            |            |            |            |
| CP014444.1 |            |            |             | -GAC       |            |            |            |            |
| CP014441.1 |            |            |             | -GAC       |            |            |            |            |
| CP014438.1 |            |            |             | -GAC       |            |            |            |            |
| CP014435.1 |            |            |             | -GAC       |            |            |            |            |
| CP014432.1 |            |            |             | -GAC       |            |            |            |            |
| CP014429.1 |            |            |             | -GAC       |            |            |            |            |
| CP014426.1 |            |            |             | -GAC       |            |            |            |            |
| CP014423.1 |            |            |             | -GAC       |            |            |            |            |
| CP014420.1 |            |            |             | -GAC       |            |            |            |            |
| CP014415.1 |            |            |             | -GAC       |            |            |            |            |
| CP014412.1 |            |            |             | -GAC       |            |            |            |            |
| CP014409.1 |            |            |             | -GAC       |            |            |            |            |
| CP014407.1 |            |            |             | -GAC       |            |            |            |            |
| CP014402.1 |            |            |             | -GAC       |            |            |            |            |
| CP014397.1 |            |            |             | -GAC       |            |            |            |            |
| CP014392.1 |            |            |             | -GAC       |            |            |            |            |
| CP014387.1 |            |            |             | -GAC       |            |            |            |            |
| CP014384.1 |            |            |             | -GAC       |            |            |            |            |
| CP014381.1 |            |            |             | -GAC       |            |            |            |            |
| CP014371.1 |            |            |             | -GAC       |            |            |            |            |
| CP014368.1 |            |            |             | -GAC       |            |            |            |            |
| CP014365.1 |            |            |             | -GAC       |            |            |            |            |
| CP014362.1 |            |            |             | -GAC       |            |            |            |            |
| CP014376.1 |            |            |             | -GAC       |            |            |            |            |
| CP009423.1 |            |            |             | -GAC       |            |            |            |            |
| CP016855.1 |            |            |             | -GAC       |            |            |            |            |
| CP013231.1 |            |            |             | -GAC       |            |            |            |            |
| CP010300.1 |            |            |             | -GAC       |            |            |            |            |
| CP010299.1 |            |            |             | -GAC       |            |            |            |            |
| CP010298.1 |            |            |             | -GAC       |            |            |            |            |
| CP010297.1 |            |            |             | -GAC       |            |            |            |            |
| CP010296.1 |            |            |             | -GAC       |            |            |            |            |
| CP010295.1 |            |            |             | -GAC       |            |            |            |            |
| CP007690.1 |            |            |             | -GAC       |            |            |            |            |
| CP007176.1 |            |            |             | -GAC       |            |            |            |            |
| CP000730.1 |            |            |             | -GAC       |            |            |            |            |
| CP000255.1 |            |            |             | -GAC       |            |            |            |            |
| CP007539.1 |            |            |             | -GAC       |            |            |            |            |
| CP007657.1 |            |            |             | -GAC       |            |            |            |            |
| AP014921.1 |            |            |             | -GAC       |            |            |            |            |
| AB436955.1 |            |            |             | -GAC       |            |            |            |            |
| AB489885.1 |            |            |             | -GAC       |            |            |            |            |
| AB489873.1 |            |            |             | -GAC       |            |            |            |            |
| AB489883.1 |            |            |             | -GAC       |            |            |            |            |
| AB489874.1 |            |            |             | -GAC       |            |            |            |            |
| LT615218.1 | CAAAATAAGC | CATCAGAAAC | AAATGCATAC  | AAGGTAACAA | CACATGCAAA | TGGTCAAGTA | TCATATGGCG | CTGCCCGAC  |
| AB436976.1 | CAAAATAAGC | CATCAGAAAC | AAATGCATAC  | AAGGTAACAA | CACATGCAAA | TGGTCAAGTA | TCATATGGCG | CTGCCCGAC  |
| AB489892.1 | CAAAATAAGC | CATCAGAAAC | AAATGCATAC  | AAGGTAACAA | CACATGCAAA | TGGTCAAGTA | TCATATGGCG | CTGCCCGAC  |
| AJ306908.1 | CAAAACAAGC | CAAGCGAAAC | AAACGCATAT  | AAGGTAACAA | CACATGCAAA | TGGTCAAGTG | TCATACGGGG | CTGCCCGAC  |
| CP015646.1 | CAAAACAAGC | CAAGCGAAAC | AAACGCATAT  | AAGGTAACAA | CACATGCAAA | TGGTCAAGTG | TCATACGGGG | CTGCCCGAC  |
| AB488510.1 |            |            |             |            |            |            |            |            |
| EU105387.1 |            |            |             |            |            |            |            |            |
| AB436975.1 | CAAAACAAGC | CAAGTGAAAC | GAAACGCATAT | AAGGTAACAA | CACACGGAAA | TGGCCAAGTA | TCATATGGCG | CTGCCCGAAC |
| AB488499.1 | CAAAACAAGC | CAAGTGAAAC | GAAACGCATAT | AAGGTAACAA | CACACGGAAA | TGGCCAAGTA | TCATATGGCG | CTGCCCGAAC |
| AJ309189.1 |            |            |             |            |            |            |            |            |
| FR821779.1 | CAAAACAAGC | CAAAACAAC  | AAACGCATAT  | AAGGTAACAA | CACATGCAAA | CGGCCAAGTG | TCATACGGAG | CTCGTCCGAC |
| CP012593.1 |            |            |             |            |            |            |            | -GAC       |
| CP012692.1 |            |            |             |            |            |            |            | -GAC       |
| CP013955.1 |            |            |             |            |            |            |            | -GAC       |
| CP013953.1 |            |            |             |            |            |            |            | -GAC       |
| CP014064.1 |            |            |             |            |            |            |            | -GAC       |
| LT009690.1 |            |            |             |            |            |            |            | -GAC       |
| AP017320.1 |            |            |             |            |            |            |            | -GAC       |
| CP010890.1 |            |            |             |            |            |            |            | -GAC       |
| CP001844.2 |            |            |             |            |            |            |            | -GAC       |
| CP001781.1 |            |            |             |            |            |            |            | -GAC       |
| AB488501.1 |            |            |             |            |            |            |            | -GAC       |
| AB489898.1 |            |            |             |            |            |            |            | -GAC       |
| HE579073.1 |            |            |             |            |            |            |            | -GAC       |
| HE579071.1 |            |            |             |            |            |            |            | -GAC       |
| HE579069.1 |            |            |             |            |            |            |            | -GAC       |
| HE579065.1 |            |            |             |            |            |            |            | -GAC       |
| HE579063.1 |            |            |             |            |            |            |            | -GAC       |



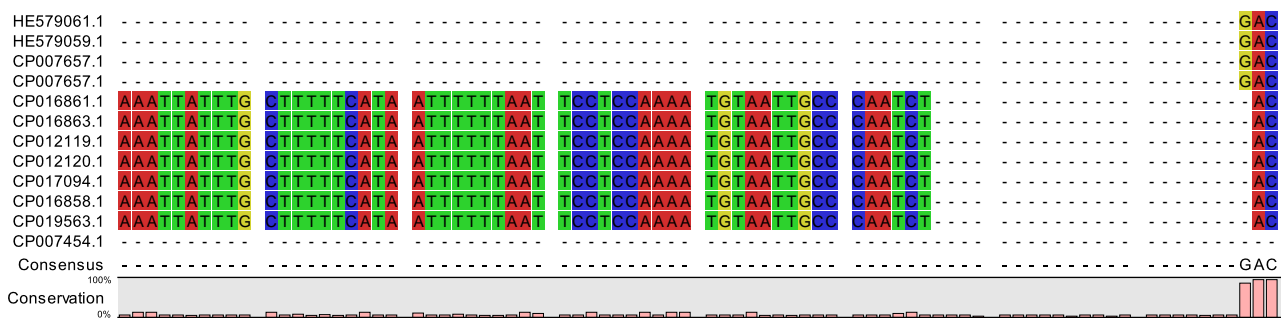

HE579061.1 ACAA AAAAAG CCAAGGA - A 1444  
 HE579059.1 ACAA AAAAAG CCAAGGA - A 1444  
 CP007657.1 ATACAAGAAG CCAAGTAA - A 262  
 CP007657.1 ATACAAGAAG CCAAGTAA - A 262  
 CP016861.1 ATTAAGAAA CAAAAATTTA 1856  
 CP016863.1 ATTAAGAAA CAAAAATTTA 1853  
 CP012119.1 ATTAAGAAA CAAAAATTTA 1856  
 CP012120.1 ATTAAGAAA CAAAAATTTA 1856  
 CP017094.1 ATTAAGAAA CAAAAATTTA 1855  
 CP016858.1 ATTAAGAAA CAAAAATTTA 1856  
 CP019563.1 ATTAAGAAA CAAAAATTTA 2132  
 CP007454.1 ----- 1480

Consensus ATACAAGAAG CCAAGTAA - A

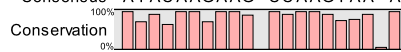



|            | 2,420       | 2,440      | 2,460      |            |            |            |            |      |
|------------|-------------|------------|------------|------------|------------|------------|------------|------|
| CP007670.1 | ACAAATGCAT  | ACAAATGTAA | AACACATGCA | 1964       |            |            |            |      |
| CP003033.1 | ACAAATGCAT  | ACAAATGTAA | AACACATGCA | 1964       |            |            |            |      |
| CP018205.1 | ACAAATGCAT  | ACAAATGTAA | AACACATGCA | 1964       |            |            |            |      |
| AP017377.1 | ACAAATGCAT  | ACAAATGTAA | AACACATGCA | 1964       |            |            |            |      |
| LT598688.1 | ACAAATGCAT  | ACAAATGTAA | AACACATGCA | 1964       |            |            |            |      |
| CP007676.1 | ACAAATGCAT  | ACAAATGTAA | AACACATGCA | 1964       |            |            |            |      |
| CP007672.1 | ACAAATGCAT  | ACAAATGTAA | AACACATGCA | 1964       |            |            |            |      |
| CP007674.1 | ACAAATGCAT  | ACAAATGTAA | AACACATGCA | 1964       |            |            |            |      |
| CP011526.1 | ACAAATGCAT  | ACAAATGTAA | AACACATGCA | 1964       |            |            |            |      |
| HF937103.1 | ACAAATGCAT  | ACAAATGTAA | AACACATGCA | 1964       |            |            |            |      |
| AP009351.1 | ACAAATGCAT  | ACAAATGTAA | AACACATGCA | 1964       |            |            |            |      |
| CP000046.1 | ACAAATGCAT  | ACAAATGTAA | AACACATGCA | 1964       |            |            |            |      |
| CP000253.1 | ACAAATGCAT  | ACAAATGTAA | AACACATGCA | 1964       |            |            |            |      |
| AC025591.8 | ACAAATGCAT  | ACAAATGTAA | AACACATGCA | 1964       |            |            |            |      |
| LT671859.1 | ACAAATGCAT  | ACAAATGTAA | AACACATGCA | 1964       |            |            |            |      |
| CP007499.1 | ACAAATGCAT  | ACAAATGTAA | AACACATGCA | 1964       |            |            |            |      |
| X17679.1   | ACAAATGCAT  | ACAAATGTAA | AACACATGCA | 1964       |            |            |            |      |
| CP007657.1 | ACAAATGCAT  | ACAAATGTAA | AACACATGCA | 1883       |            |            |            |      |
| CP014444.1 | ACAAATGCAT  | ACAAATGTAA | AACACATGCA | 1883       |            |            |            |      |
| CP014441.1 | ACAAATGCAT  | ACAAATGTAA | AACACATGCA | 1883       |            |            |            |      |
| CP014438.1 | ACAAATGCAT  | ACAAATGTAA | AACACATGCA | 1883       |            |            |            |      |
| CP014435.1 | ACAAATGCAT  | ACAAATGTAA | AACACATGCA | 1883       |            |            |            |      |
| CP014432.1 | ACAAATGCAT  | ACAAATGTAA | AACACATGCA | 1883       |            |            |            |      |
| CP014429.1 | ACAAATGCAT  | ACAAATGTAA | AACACATGCA | 1883       |            |            |            |      |
| CP014426.1 | ACAAATGCAT  | ACAAATGTAA | AACACATGCA | 1883       |            |            |            |      |
| CP014423.1 | ACAAATGCAT  | ACAAATGTAA | AACACATGCA | 1883       |            |            |            |      |
| CP014420.1 | ACAAATGCAT  | ACAAATGTAA | AACACATGCA | 1883       |            |            |            |      |
| CP014415.1 | ACAAATGCAT  | ACAAATGTAA | AACACATGCA | 1883       |            |            |            |      |
| CP014412.1 | ACAAATGCAT  | ACAAATGTAA | AACACATGCA | 1883       |            |            |            |      |
| CP014409.1 | ACAAATGCAT  | ACAAATGTAA | AACACATGCA | 1883       |            |            |            |      |
| CP014407.1 | ACAAATGCAT  | ACAAATGTAA | AACACATGCA | 1883       |            |            |            |      |
| CP014402.1 | ACAAATGCAT  | ACAAATGTAA | AACACATGCA | 1883       |            |            |            |      |
| CP014397.1 | ACAAATGCAT  | ACAAATGTAA | AACACATGCA | 1883       |            |            |            |      |
| CP014392.1 | ACAAATGCAT  | ACAAATGTAA | AACACATGCA | 1883       |            |            |            |      |
| CP014387.1 | ACAAATGCAT  | ACAAATGTAA | AACACATGCA | 1883       |            |            |            |      |
| CP014384.1 | ACAAATGCAT  | ACAAATGTAA | AACACATGCA | 1883       |            |            |            |      |
| CP014381.1 | ACAAATGCAT  | ACAAATGTAA | AACACATGCA | 1883       |            |            |            |      |
| CP014371.1 | ACAAATGCAT  | ACAAATGTAA | AACACATGCA | 1883       |            |            |            |      |
| CP014368.1 | ACAAATGCAT  | ACAAATGTAA | AACACATGCA | 1883       |            |            |            |      |
| CP014365.1 | ACAAATGCAT  | ACAAATGTAA | AACACATGCA | 1883       |            |            |            |      |
| CP014362.1 | ACAAATGCAT  | ACAAATGTAA | AACACATGCA | 1883       |            |            |            |      |
| CP014376.1 | ACAAATGCAT  | ACAAATGTAA | AACACATGCA | 1883       |            |            |            |      |
| CP009423.1 | ACAAATGCAT  | ACAAATGTAA | AACACATGCA | 1883       |            |            |            |      |
| CP016855.1 | ACAAATGCAT  | ACAAATGTAA | AACACATGCA | 1883       |            |            |            |      |
| CP013231.1 | ACAAATGCAT  | ACAAATGTAA | AACACATGCA | 1883       |            |            |            |      |
| CP010300.1 | ACAAATGCAT  | ACAAATGTAA | AACACATGCA | 1883       |            |            |            |      |
| CP010299.1 | ACAAATGCAT  | ACAAATGTAA | AACACATGCA | 1883       |            |            |            |      |
| CP010298.1 | ACAAATGCAT  | ACAAATGTAA | AACACATGCA | 1883       |            |            |            |      |
| CP010297.1 | ACAAATGCAT  | ACAAATGTAA | AACACATGCA | 1883       |            |            |            |      |
| CP010296.1 | ACAAATGCAT  | ACAAATGTAA | AACACATGCA | 1883       |            |            |            |      |
| CP010295.1 | ACAAATGCAT  | ACAAATGTAA | AACACATGCA | 1883       |            |            |            |      |
| CP007690.1 | ACAAATGCAT  | ACAAATGTAA | AACACATGCA | 1883       |            |            |            |      |
| CP007176.1 | ACAAATGCAT  | ACAAATGTAA | AACACATGCA | 1883       |            |            |            |      |
| CP000730.1 | ACAAATGCAT  | ACAAATGTAA | AACACATGCA | 1883       |            |            |            |      |
| CP000255.1 | ACAAATGCAT  | ACAAATGTAA | AACACATGCA | 1883       |            |            |            |      |
| CP007539.1 | ACAAATGCAT  | ACAAATGTAA | AACACATGCA | 1963       |            |            |            |      |
| CP007657.1 | ACAAATGCAT  | ACAAATGTAA | AACACATGCA | 1883       |            |            |            |      |
| AP014921.1 | ACAAATGCAT  | ACAAATGTAA | AACACATGCA | 1883       |            |            |            |      |
| AB436955.1 | ACAAATGCAT  | ACAAATGTAA | AACACATGCA | 1872       |            |            |            |      |
| AB489885.1 | ACAAATGCAT  | ACAAATGTAA | AACACATGCA | 1872       |            |            |            |      |
| AB489873.1 | ACAAATGCAT  | ACAAATGTAA | AACACATGCA | 1872       |            |            |            |      |
| AB489883.1 | ACAAATGCAT  | ACAAATGTAA | AACACATGCA | 1791       |            |            |            |      |
| AB489874.1 | ACAAATGCAT  | ACAAATGTAA | AACACATGCA | 1779       |            |            |            |      |
| LT615218.1 | ACAAATGCAT  | ATAACGTAA  | AACACATGCA | GATGGTACTG | CGACATATGG | GCCTAGAGTA | ACAAAAATAA | 2165 |
| AB436976.1 | ACAAATGCAT  | ATAACGTAA  | AACACATGCA | GATGGTACTG | CGACATATGG | GCCTAGAGTA | ACAAAAATAA | 2165 |
| AB489892.1 | ACAAATGCAT  | ATAACGTAA  | AACACATGCA | GATGGTACTG | CGACATATGG | GCCTAGAGTA | ACAAAAATAA | 2073 |
| AJ306908.1 | ACAAACGCAT  | ATAACGTAA  | AACACATGCA | GATGGTACTG | CGACATATGG | GCCTAGAGTA | ACAAAAATAA | 2165 |
| CP015646.1 | ACAAACGCAT  | ATAACGTAA  | AACACATGCA | GATGGTACTG | CGACATATGG | TCCTAGAGTA | ACAAAAATAA | 2165 |
| AB488510.1 | ACAAAGTGCAT | ATAACGTAA  | AACACATGCA |            |            |            |            | 1568 |
| EU105387.1 | ACAAAGTGCAT | ATAACGTAA  | AACACATGCA |            |            |            |            | 1520 |
| AB436975.1 | ACAAAGTGCAT | ATAACGTAA  | AACACATGCA |            |            |            |            | 2126 |
| AB488499.1 | ACAAAGTGCAT | ATAACGTAA  | AACACATGCA |            |            |            |            | 2034 |
| AJ309189.1 | ACAAAGTGCAT | ATAACGTAA  | AACACATGCA |            |            |            |            | 1386 |
| FR821779.1 | ACAAATGCAT  | ATAACGTAA  | AACACATGCA | GATGGTACTG | CGACATATGG | TCCTAGAGTA | ACAAAAATAA | 2150 |
| CP012593.1 | ACAAACGCAT  | ATAACGTAA  | AACACATGCA | GATGGT     |            |            |            | 1480 |
| CP012692.1 | ACAAACGCAT  | ATAACGTAA  | AACACATGCA | GATGGT     |            |            |            | 1480 |
| CP013955.1 | ACAAACGCAT  | ATAACGTAA  | AACACATGCA | GATGGT     |            |            |            | 1480 |
| CP013953.1 | ACAAACGCAT  | ATAACGTAA  | AACACATGCA | GATGGT     |            |            |            | 1480 |
| CP014064.1 | ACAAACGCAT  | ATAACGTAA  | AACACATGCA | GATGGT     |            |            |            | 1480 |
| LT009690.1 | ACAAACGCAT  | ATAACGTAA  | AACACATGCA | GATGGT     |            |            |            | 1480 |
| AP017320.1 | ACAAACGCAT  | ATAACGTAA  | AACACATGCA | GATGGT     |            |            |            | 1480 |
| CP010890.1 | ACAAACGCAT  | ATAACGTAA  | AACACATGCA | GATGGT     |            |            |            | 1480 |
| CP001844.2 | ACAAACGCAT  | ATAACGTAA  | AACACATGCA | GATGGT     |            |            |            | 1480 |
| CP001781.1 | ACAAACGCAT  | ATAACGTAA  | AACACATGCA | GATGGT     |            |            |            | 1480 |
| AB488501.1 | ACAAACGCAT  | ATAACGTAA  | AACACATGCA | GATGGT     |            |            |            | 1480 |
| AB489898.1 | ACAAACGCAT  | ATAACGTAA  | AACACATGCA | GATGGT     |            |            |            | 1480 |
| HE579073.1 | ACAAACGCAT  | ATAACGTAA  | AACACATGCA | GATGGT     |            |            |            | 1480 |
| HE579071.1 | ACAAACGCAT  | ATAACGTAA  | AACACATGCA | GATGGT     |            |            |            | 1480 |
| HE579069.1 | ACAAACGCAT  | ATAACGTAA  | AACACATGCA | GATGGT     |            |            |            | 1480 |
| HE579065.1 | ACAAACGCAT  | ATAACGTAA  | AACACATGCA | GATGGT     |            |            |            | 1480 |
| HE579063.1 | ACAAACGCAT  | ATAACGTAA  | AACACATGCA | GATGGT     |            |            |            | 1480 |

---

CP007670.1  
CP003033.1  
CP018205.1  
AP017377.1  
LT598688.1  
CP007676.1  
CP007672.1  
CP007674.1  
CP011526.1  
HF937103.1  
AP009351.1  
CP000046.1  
CP000253.1  
AC025591.8  
LT671859.1  
CP007499.1  
X17679.1  
CP007657.1  
CP014444.1  
CP014441.1  
CP014438.1  
CP014435.1  
CP014432.1  
CP014429.1  
CP014426.1  
CP014423.1  
CP014420.1  
CP014415.1  
CP014412.1  
CP014409.1  
CP014407.1  
CP014402.1  
CP014397.1  
CP014392.1  
CP014387.1  
CP014384.1  
CP014381.1  
CP014371.1  
CP014368.1  
CP014365.1  
CP014362.1  
CP014376.1  
CP009423.1  
CP016855.1  
CP013231.1  
CP010300.1  
CP010299.1  
CP010298.1  
CP010297.1  
CP010296.1  
CP010295.1  
CP007690.1  
CP007176.1  
CP000730.1  
CP000255.1  
CP007539.1  
CP007657.1  
AP014921.1  
AB436955.1  
AB489885.1  
AB489873.1  
AB489883.1  
AB489874.1  
LT615218.1  
AB436976.1  
AB489892.1  
AJ306908.1  
CP015646.1  
AB488510.1  
EU105387.1  
AB436975.1  
AB488499.1  
AJ309189.1  
FR821779.1  
CP012593.1  
CP012692.1  
CP013955.1  
CP013953.1  
CP014064.1  
LT009690.1  
AP017320.1  
CP010890.1  
CP001844.2  
CP001781.1  
AB488501.1  
AB489898.1  
HE579073.1  
HE579071.1  
HE579069.1  
HE579065.1  
HE579063.1

|            |            |             |             |            |            |            |           |     |     |      |
|------------|------------|-------------|-------------|------------|------------|------------|-----------|-----|-----|------|
| HE579061.1 | ACAAACGCAT | ATAACGTAAAC | AACACATGCA  | GATGGT     | ---        | ---        | ---       | --- | --- | 1480 |
| HE579059.1 | ACAAACGCAT | ATAACGTAAAC | AACACATGCA  | GATGGT     | ---        | ---        | ---       | --- | --- | 1480 |
| CP007657.1 | ACAAATGCAT | ACAATGTAAAC | AACACATGCA  | GATGGTACTG | GGACATATGG | GCCTAGAGTA | ACAAAAATA | --- | --- | 331  |
| CP007657.1 | ACAAATGCAT | ACAATGTAAAC | AACACATGCA  | GATGGTACTG | GGACATATGG | GCCTAGAGTA | ACAAAAATA | --- | --- | 331  |
| CP016861.1 | AAAGACATTA | ACTATATATT  | AACTAGAAATA | AAC        | ---        | ---        | ---       | --- | --- | 1889 |
| CP016863.1 | AAAGACATTA | ACTATATATT  | AACTAGAAATA | AAC        | ---        | ---        | ---       | --- | --- | 1886 |
| CP012119.1 | AAAGACATTA | ACTATATATT  | AACTAGAAATA | AAC        | ---        | ---        | ---       | --- | --- | 1889 |
| CP012120.1 | AAAGACATTA | ACTATATATT  | AACTAGAAATA | AAC        | ---        | ---        | ---       | --- | --- | 1889 |
| CP017094.1 | AAAGACATTA | ACTATATATT  | AACTAGAAATA | AAC        | ---        | ---        | ---       | --- | --- | 1888 |
| CP016858.1 | AAAGACATTA | ACTATATATT  | AACTAGAAATA | AAC        | ---        | ---        | ---       | --- | --- | 1889 |
| CP019563.1 | AAAGACATTA | ACTATATATT  | AACTAGAAATA | AAC        | ---        | ---        | ---       | --- | --- | 2165 |
| CP007454.1 | ACAAATGCAT | ACAATGTAAAC | AACACATGCA  | ---        | ---        | ---        | ---       | --- | --- | 1480 |

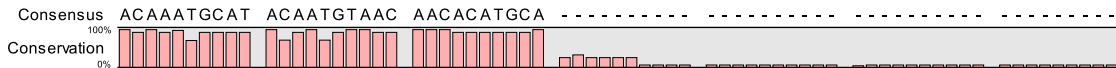

HE579061.1  
HE579059.1  
CP007657.1  
CP007657.1  
CP016861.1  
CP016863.1  
CP012119.1  
CP012120.1  
CP017094.1  
CP016858.1  
CP019563.1  
CP007454.1  
Consensus  
100%  
Conservation  
0%
